# Supplementary material for: Complex Pathways Towards Emergent Pastoral Settlements: New Research on the Bronze Age Xindian Culture of Northwest China
Source: Springer Nature journal article supplement (doi:10.1007/s10963-021-09160-w), 2021-12-01
Supplement: MOESM1 [file 20005330]

## Sheet: AppendixI_Xindian_survey_finds
Journal of World Prehistory, 34(4) Complex Pathways Towards Emergent Pastoral Settlements: New Research on the Bronze Age Xindian Culture of Northwest China Yitzchak Jaffe, Anke Hein, Andrew Womack, Katherine Brunson, Jade d’Alpoim Guedes, Rongzhen Guo, Jing Zhou, Jada Ko, Xiaohong Wu, Hui Wang, Shuicheng Li, Rowan Flad (corresponding author: rflad@fas.harvard.edu)
Collection number	Item Number	Collection year	Site	County	Collection unit	Object type	Material type	Object part	Weight (g)	Surface	Period	Paste	Color
FCN4502	1	2017	Xindian A	Lintao	17LX-I-001	ceramic sherd	ceramic	body	22.5	plain	Xindian	fine sand	orange yellow
FCN4502	2	2017	Xindian A	Lintao	17LX-I-001	ceramic sherd	ceramic	base	69.2	plain	modern	coarse sand	red
FCN4502	3	2017	Xindian A	Lintao	17LX-I-001	ceramic sherd	ceramic	body	9.5	slip	Xindian	fine sand	red
FCN4502	4	2017	Xindian A	Lintao	17LX-I-001	ceramic sherd	ceramic	body	6.2	slip+black pigment	Xindian	fine sand	orange
FCN4502	5	2017	Xindian A	Lintao	17LX-I-001	ceramic sherd	ceramic	body	5.5	black pigment	Xindian	fine sand	orange
FCN4502	6	2017	Xindian A	Lintao	17LX-I-001	ceramic sherd	ceramic	body	13	slip+black pigment	Xindian	fine sand	orange
FCN4502	7	2017	Xindian A	Lintao	17LX-I-001	ceramic sherd	ceramic	body	3.9	slip+black pigment	Xindian	fine sand	orange
FCN4502	8	2017	Xindian A	Lintao	17LX-I-001	ceramic sherd	ceramic	body	1.5	black pigment	Xindian	fine	orange yellow
FCN4503	1	2017	Xindian A	Lintao	17LX-I-005	ceramic sherd	ceramic	body	29.5	slip	Xindian	fine sand	orange
FCN4504	1	2017	Xindian A	Lintao	17LX-I-028	ceramic sherd	ceramic	body	5.1	plain	unclear	fine	yellow brown
FCN4505	1	2017	Xindian A	Lintao	17LX-I-034	ceramic sherd	ceramic	body	24	plain	Xindian	fine sand	orange
FCN4506	1	2017	Xindian A	Lintao	17LX-I-047	ceramic sherd	ceramic	rim	19	folded rim	Han	fine	black
FCN4507	1	2017	Xindian A	Lintao	17LX-I-017	ceramic sherd	ceramic	body	28.1	slip+black pigment	Xindian	fine sand	orange
FCN4507	2	2017	Xindian A	Lintao	17LX-I-017	ceramic sherd	ceramic	body	3.5	slip	Xindian	fine	grey
FCN4507	3	2017	Xindian A	Lintao	17LX-I-017	ceramic sherd	ceramic	shoulder	12.3	slip	Xindian	fine	grey
FCN4507	4	2017	Xindian A	Lintao	17LX-I-017	ceramic sherd	ceramic	body	4.1	black pigment	Xindian	coarse sand	orange
FCN4508	1	2017	Xindian A	Lintao	17LX-I-094	ceramic sherd	ceramic	rim	47.5	plain	Han	fine	grey
FCN4508	2	2017	Xindian A	Lintao	17LX-I-094	ceramic sherd	ceramic	body	6.1	plain	unclear	fine sand	orange
FCN4509	1	2017	Xindian A	Lintao	17LX-I-095	ceramic sherd	ceramic	rim	50.7	plain	Han	fine	grey
FCN4509	2	2017	Xindian A	Lintao	17LX-I-095	ceramic sherd	ceramic	rim	35.1	plain	Han	fine	grey
FCN4509	3	2017	Xindian A	Lintao	17LX-I-095	ceramic sherd	ceramic	body	19.5	fine cordmarked	unclear	fine	orange
FCN4510	1	2017	Xindian A	Lintao	17LX-I-110	ceramic sherd	ceramic	neck	22.2	slip+black pigment	Majiayao	fine sand	brown
FCN4511	1	2017	Xindian A	Lintao	17LX-I-155	ceramic sherd	ceramic	body	18.1	plain	Han	fine	grey
FCN4511	2	2017	Xindian A	Lintao	17LX-I-155	ceramic sherd	ceramic	body	11.9	plain	Han	fine	grey
FCN4512	1	2017	Xindian A	Lintao	17LX-I-161	ceramic sherd	ceramic	body	5.8	plain	unclear	fine sand	orange
FCN4513	1	2017	Xindian A	Lintao	17LX-I-164	ceramic sherd	ceramic	body	5.3	slip	unclear	fine sand	red
FCN4514	1	2017	Xindian A	Lintao	17LX-I-170	ceramic sherd	ceramic	body	17.8	plain	Han	fine	grey
FCN4514	2	2017	Xindian A	Lintao	17LX-I-170	ceramic sherd	ceramic	body	47.5	plain	Han	fine	grey
FCN4514	3	2017	Xindian A	Lintao	17LX-I-170	ceramic sherd	ceramic	body	46.8	plain	Han	fine	grey
FCN4514	4	2017	Xindian A	Lintao	17LX-I-170	ceramic sherd	ceramic	body	15.5	plain	Han	fine	grey
FCN4514	5	2017	Xindian A	Lintao	17LX-I-170	ceramic sherd	ceramic	body	4.3	plain	unclear	fine	grey
FCN4516	1	2017	Xindian A	Lintao	17LX-I-174	ceramic sherd	ceramic	body	19.8	impressions	Han	fine sand	brown
FCN4516	2	2017	Xindian A	Lintao	17LX-I-174	ceramic sherd	ceramic	body	7.3	plain	Han	fine sand	brown
FCN4516	3	2017	Xindian A	Lintao	17LX-I-174	ceramic sherd	ceramic	body	9.2	polish	Han	fine	light brown
FCN4517	1	2017	Xindian A	Lintao	17LX-I-175	ceramic sherd	ceramic	body	24.2	plain	Han	fine	grey
FCN4517	2	2017	Xindian A	Lintao	17LX-I-175	ceramic sherd	ceramic	body	30.5	plain	Han	fine	grey
FCN4517	3	2017	Xindian A	Lintao	17LX-I-175	ceramic sherd	ceramic	handle	113.9	plain	Xindian	fine sand	red brown
FCN4517	4	2017	Xindian A	Lintao	17LX-I-175	ceramic sherd	ceramic	body	23.4	plain	Han	fine	grey
FCN4517	5	2017	Xindian A	Lintao	17LX-I-175	ceramic sherd	ceramic	rim	24.7	plain	Xindian	fine	yellow brown
FCN4517	6	2017	Xindian A	Lintao	17LX-I-175	ceramic sherd	ceramic	body	12.4	crossed cordmarked	Xindian	fine	yellow brown
FCN4517	7	2017	Xindian A	Lintao	17LX-I-175	ceramic sherd	ceramic	body	12.4	crossed cordmarked	Xindian	fine	yellow brown
FCN4517	8	2017	Xindian A	Lintao	17LX-I-175	ceramic sherd	ceramic	body	26.7	impressions	unclear	coarse sand	orange yellow
FCN4518	1	2017	Xindian A	Lintao	17LX-I-178	ceramic sherd	ceramic	body	15.6	plain	unclear	fine	grey
FCN4518	2	2017	Xindian A	Lintao	17LX-I-178	ceramic sherd	ceramic	rim	66.5	plain	Han	fine	grey
FCN4518	3	2017	Xindian A	Lintao	17LX-I-178	ceramic sherd	ceramic	body	20.9	plain	Han	fine	grey
FCN4518	4	2017	Xindian A	Lintao	17LX-I-178	ceramic sherd	ceramic	handle	14.5	plain	unclear	fine	grey
FCN4518	5	2017	Xindian A	Lintao	17LX-I-178	ceramic sherd	ceramic	body	10.7	plain	Han	fine	grey
FCN4518	6	2017	Xindian A	Lintao	17LX-I-178	ceramic sherd	ceramic	body	11.3	glaze	modern	fine	brown
FCN4518	7	2017	Xindian A	Lintao	17LX-I-178	ceramic sherd	ceramic	body	9.5	plain	modern	fine	grey
FCN4519	1	2017	Xindian A	Lintao	17LX-I-180	ceramic sherd	ceramic	body	29.3	plain	modern	fine	grey
FCN4519	2	2017	Xindian A	Lintao	17LX-I-180	ceramic sherd	ceramic	base	51.3	plain	modern	coarse sand	yellow brown
FCN4519	3	2017	Xindian A	Lintao	17LX-I-180	ceramic sherd	ceramic	body	68	interior fabric	modern	fine	grey
FCN4519	4	2017	Xindian A	Lintao	17LX-I-180	ceramic sherd	ceramic	body	14.9	plain	Xindian	coarse sand	red
FCN4519	5	2017	Xindian A	Lintao	17LX-I-180	ceramic sherd	ceramic	body	22.8	plain	unclear	coarse sand	orange yellow
FCN4520	1	2017	Xindian A	Lintao	17LX-I-181	ceramic sherd	ceramic	body	21	plain	modern	fine	grey
FCN4521	1	2017	Xindian A	Lintao	17LX-I-182	ceramic sherd	ceramic	body	13.6	slip+black pigment	Xindian	fine sand	orange yellow
FCN4521	2	2017	Xindian A	Lintao	17LX-I-182	ceramic sherd	ceramic	rim	21	plain	Han	fine	grey
FCN4522	1	2017	Xindian A	Lintao	17LX-I-183	ceramic sherd	ceramic	body	5.3	plain	Han	fine	grey
FCN4522	2	2017	Xindian A	Lintao	17LX-I-183	ceramic sherd	ceramic	body	3.3	plain	Han	fine	grey
FCN4523	1	2017	Xindian A	Lintao	17LX-I-190	ceramic sherd	ceramic	body	3.7	plain	unclear	fine	yellow brown
FCN4524	1	2017	Xindian A	Lintao	17LX-I-206	ceramic sherd	ceramic	body	3.8	plain	unclear	fine	yellow brown
FCN4524	2	2017	Xindian A	Lintao	17LX-I-206	ceramic sherd	ceramic	body	8.2	plain	Xindian	fine	brown
FCN4524	3	2017	Xindian A	Lintao	17LX-I-206	ceramic sherd	ceramic	rim	8.5	plain	Xindian	fine sand	yellow brown
FCN4525	1	2017	Xindian A	Lintao	17LX-I-213	ceramic sherd	ceramic	body	4.9	plain	unclear	fine	grey
FCN4526	1	2017	Xindian A	Lintao	17LX-I-216	ceramic sherd	ceramic	body	16.1	plain	Han	fine	grey
FCN4526	2	2017	Xindian A	Lintao	17LX-I-216	ceramic sherd	ceramic	body	3.7	plain	Xindian	fine sand	red
FCN4527	1	2017	Xindian A	Lintao	17LX-I-247	ceramic sherd	ceramic	body	12.2	plain	Han	fine	grey
FCN5120	1	2017	Xindian A	Lintao	17LX-I-174	ceramic small find	ceramic	body	9	plain	unclear	fine	grey
FCN4501	1	2017	Xindian B	Lintao	17LX-III-Observation.1	ceramic sherd	ceramic	body	15	black pigment	Xindian	fine sand	brown
FCN4501	2	2017	Xindian B	Lintao	17LX-III-Observation.1	ceramic sherd	ceramic	body	4.6	plain	Xindian	coarse sand	orange
FCN4501	3	2017	Xindian B	Lintao	17LX-III-Observation.1	ceramic sherd	ceramic	body	4.7	plain	Xindian	coarse sand	orange
FCN4501	4	2017	Xindian B	Lintao	17LX-III-Observation.1	ceramic sherd	ceramic	body	2.6	plain	Xindian	coarse sand	orange
FCN4501	5	2017	Xindian B	Lintao	17LX-III-Observation.1	ceramic sherd	ceramic	body	2.2	slip+black pigment	Xindian	fine sand	red
FCN4501	6	2017	Xindian B	Lintao	17LX-III-Observation.1	ceramic sherd	ceramic	body	3.3	slip+black pigment	Xindian	fine sand	red
FCN4501	7	2017	Xindian B	Lintao	17LX-III-Observation.1	ceramic sherd	ceramic	body	2.1	slip+black pigment	Xindian	fine sand	red
FCN4501	8	2017	Xindian B	Lintao	17LX-III-Observation.1	ceramic sherd	ceramic	body	2.2	slip+black pigment	Xindian	fine sand	red
FCN4531	1	2017	Xindian B	Lintao	17LX-III-004	stone tool	stone		73		unclear	stone
FCN4528	1	2017	Xindian B	Lintao	17LX-III-004	ceramic sherd	ceramic	rim	122.3	appliqué+cordmarked+impressions	Xindian	coarse sand	yellow brown
FCN4528	2	2017	Xindian B	Lintao	17LX-III-004	ceramic sherd	ceramic	body	30.9	cordmarked	Xindian	coarse sand	red brown
FCN4528	3	2017	Xindian B	Lintao	17LX-III-004	ceramic sherd	ceramic	body	7.8	plain	Xindian	coarse sand	grey white (red brown)
FCN4528	4	2017	Xindian B	Lintao	17LX-III-004	ceramic sherd	ceramic	body	7.4	slip+black pigment	Xindian	fine sand	red brown
FCN4528	5	2017	Xindian B	Lintao	17LX-III-004	ceramic sherd	ceramic	rim	19.9	slip+black pigment	Xindian	coarse sand	orange
FCN4528	6	2017	Xindian B	Lintao	17LX-III-004	ceramic sherd	ceramic	body	9	slip	Xindian	fine sand	orange
FCN4528	7	2017	Xindian B	Lintao	17LX-III-004	ceramic sherd	ceramic	body	30.4	plain	Majiayao	fine	brown
FCN4528	8	2017	Xindian B	Lintao	17LX-III-004	ceramic sherd	ceramic	body	5.4	basket impresssions	unclear	fine	orange
FCN4528	9	2017	Xindian B	Lintao	17LX-III-004	ceramic sherd	ceramic	rim	13.6	slip+black pigment	Xindian	fine	brown
FCN4528	10	2017	Xindian B	Lintao	17LX-III-004	ceramic sherd	ceramic	body	11.2	plain	unclear	fine	orange yellow
FCN4528	11	2017	Xindian B	Lintao	17LX-III-004	ceramic sherd	ceramic	body	14.1	slip+brown pigment	Xindian	fine sand	grey
FCN4528	12	2017	Xindian B	Lintao	17LX-III-004	ceramic sherd	ceramic	body	2.6	cordmarked	unclear	coarse sand	orange
FCN4528	13	2017	Xindian B	Lintao	17LX-III-004	ceramic sherd	ceramic	body	3.5	plain	unclear	coarse sand	orange
FCN4528	14	2017	Xindian B	Lintao	17LX-III-004	ceramic sherd	ceramic	body	3.7	cordmarked	unclear	coarse sand	orange
FCN4528	15	2017	Xindian B	Lintao	17LX-III-004	ceramic sherd	ceramic	body	2.5	cordmarked+slip	unclear	fine	red brown
FCN4528	16	2017	Xindian B	Lintao	17LX-III-004	ceramic sherd	ceramic	body	2.8	cordmarked	unclear	fine sand	orange yellow
FCN4528	17	2017	Xindian B	Lintao	17LX-III-004	ceramic sherd	ceramic	body	4.7	cordmarked	unclear	fine sand	red brown
FCN4528	18	2017	Xindian B	Lintao	17LX-III-004	ceramic sherd	ceramic	body	1.6	slip	unclear	fine sand	black
FCN4528	19	2017	Xindian B	Lintao	17LX-III-004	ceramic sherd	ceramic	body	2.5	plain	unclear	coarse sand	orange
FCN4528	20	2017	Xindian B	Lintao	17LX-III-004	ceramic sherd	ceramic	rim	2.3	polish	Majiayao	fine	red
FCN4529	1	2017	Xindian B	Lintao	17LX-III-005	ceramic sherd	ceramic	body	10.7	cordmarked	Majiayao	fine sand	red brown
FCN4529	2	2017	Xindian B	Lintao	17LX-III-005	ceramic sherd	ceramic	body	7.4	cordmarked	Majiayao	fine sand	orange
FCN4529	3	2017	Xindian B	Lintao	17LX-III-005	ceramic sherd	ceramic	body	4.9	crossed cordmarked	Majiayao	coarse sand	brown
FCN4529	4	2017	Xindian B	Lintao	17LX-III-005	ceramic sherd	ceramic	body	4.9	crossed cordmarked	Majiayao	coarse sand	brown
FCN4529	5	2017	Xindian B	Lintao	17LX-III-005	ceramic sherd	ceramic	body	2.8	crossed cordmarked	Majiayao	fine	orange
FCN4529	6	2017	Xindian B	Lintao	17LX-III-005	ceramic sherd	ceramic	body	12.9	fine cordmarked	Qijia	coarse sand	red
FCN4529	7	2017	Xindian B	Lintao	17LX-III-005	ceramic sherd	ceramic	body	11	slip	Xindian	fine sand	orange
FCN4529	8	2017	Xindian B	Lintao	17LX-III-005	ceramic sherd	ceramic	body	10.6	plain	Xindian	fine sand	red brown
FCN4529	9	2017	Xindian B	Lintao	17LX-III-005	ceramic sherd	ceramic	body	2.6	black pigment	Xindian	fine sand	orange yellow
FCN4529	10	2017	Xindian B	Lintao	17LX-III-005	ceramic sherd	ceramic	body	4.3	plain	Xindian	fine sand	brown
FCN4529	11	2017	Xindian B	Lintao	17LX-III-005	ceramic sherd	ceramic	body	4.3	slip+fine cordmarked	Xindian	fine sand	red brown
FCN4529	12	2017	Xindian B	Lintao	17LX-III-005	ceramic sherd	ceramic	body	6.2	fine cordmarked	unclear	fine sand	orange
FCN4529	13	2017	Xindian B	Lintao	17LX-III-005	ceramic sherd	ceramic	body	4.2	slip+black pigment	Majiayao	fine	brown
FCN4529	14	2017	Xindian B	Lintao	17LX-III-005	ceramic sherd	ceramic	body	6.7	plain	Xindian	coarse sand	black brown
FCN4529	15	2017	Xindian B	Lintao	17LX-III-005	ceramic sherd	ceramic	body	7.7	slip+fine cordmarked	Xindian	fine sand	brown
FCN4529	16	2017	Xindian B	Lintao	17LX-III-005	ceramic sherd	ceramic	rim	1.9	plain	Qijia	fine	orange
FCN4529	17	2017	Xindian B	Lintao	17LX-III-005	ceramic sherd	ceramic	body	1.8	slip+black pigment+polish	Majiayao	fine	brown
FCN4529	18	2017	Xindian B	Lintao	17LX-III-005	ceramic sherd	ceramic	body	1.9	crossed cordmarked	Majiayao	coarse sand	red brown
FCN4529	19	2017	Xindian B	Lintao	17LX-III-005	ceramic sherd	ceramic	body	8.1	plain	unclear	fine sand	brown
FCN4529	20	2017	Xindian B	Lintao	17LX-III-005	ceramic sherd	ceramic	body	3	black pigment+polished	Majiayao	fine	orange
FCN4529	21	2017	Xindian B	Lintao	17LX-III-005	ceramic sherd	ceramic	body	1.7	plain	Qijia	fine	orange
FCN4529	22	2017	Xindian B	Lintao	17LX-III-005	ceramic sherd	ceramic	rim	1.4	plain	Qijia	fine	orange
FCN4529	23	2017	Xindian B	Lintao	17LX-III-005	ceramic sherd	ceramic	body	1.7	slip+black pigment	Majiayao	fine sand	orange
FCN4529	24	2017	Xindian B	Lintao	17LX-III-005	ceramic sherd	ceramic	body	1	polish	Majiayao	fine	orange
FCN4529	25	2017	Xindian B	Lintao	17LX-III-005	ceramic sherd	ceramic	body	1.4	black pigment+polished	Majiayao	fine	orange
FCN4621	1	2017	Xindian B	Lintao	17LX-III-017	ceramic sherd	ceramic	body	65.6	slip	Xindian	coarse sand	light brown
FCN4620	1	2017	Xindian B	Lintao	17LX-III-019	ceramic sherd	ceramic	base	76.1	cordmarked	Majiayao	coarse sand	light brown
FCN4620	2	2017	Xindian B	Lintao	17LX-III-019	ceramic sherd	ceramic	body	10.4	plain	unclear	fine	grey white
FCN4619	1	2017	Xindian B	Lintao	17LX-III-020	ceramic sherd	ceramic	body	22.5	cordmarked	unclear	coarse sand	red brown
FCN4619	2	2017	Xindian B	Lintao	17LX-III-020	ceramic sherd	ceramic	base	8.3	plain	unclear	fine	light brown
FCN4619	3	2017	Xindian B	Lintao	17LX-III-020	ceramic sherd	ceramic	handle	17.9	plain	Xindian	coarse sand	light brown
FCN4619	4	2017	Xindian B	Lintao	17LX-III-020	ceramic sherd	ceramic	body	8.7	plain	unclear	fine	red brown
FCN4619	5	2017	Xindian B	Lintao	17LX-III-020	ceramic sherd	ceramic	body	5.9	cordmarked	Majiayao	medium sand	yellow brown
FCN4619	6	2017	Xindian B	Lintao	17LX-III-020	ceramic sherd	ceramic	base	27.3	cordmarked	Qijia	coarse sand	red brown
FCN4619	7	2017	Xindian B	Lintao	17LX-III-020	ceramic sherd	ceramic	base	92.6	cordmarked	Xindian	coarse sand	orange
FCN4622	1	2017	Xindian B	Lintao	17LX-III-022	ceramic sherd	ceramic	body	33.5	cordmarked	Xindian	coarse sand	red brown
FCN4623	1	2017	Xindian B	Lintao	17LX-III-023	ceramic sherd	ceramic	neck	18	slip+black pigment+cordmarked	Xindian	fine sand	red brown
FCN4623	2	2017	Xindian B	Lintao	17LX-III-023	ceramic sherd	ceramic	body	25.9	cordmarked	Xindian	coarse sand	red brown
FCN4624	1	2017	Xindian B	Lintao	17LX-III-024	ceramic sherd	ceramic	body	9	black pigment	Majiayao	fine	light brown
FCN4625	1	2017	Xindian B	Lintao	17LX-III-025	ceramic sherd	ceramic	body	13.7	black pigment	Majiayao	fine	yellow brown
FCN4625	2	2017	Xindian B	Lintao	17LX-III-025	ceramic sherd	ceramic	body	5.6	black pigment	Majiayao	fine	light brown
FCN4625	3	2017	Xindian B	Lintao	17LX-III-025	ceramic sherd	ceramic	body	4.3	black pigment	Majiayao	fine	light brown
FCN4625	4	2017	Xindian B	Lintao	17LX-III-025	ceramic sherd	ceramic	body	2.3	fine cordmarked	Majiayao	medium sand	red brown
FCN4625	5	2017	Xindian B	Lintao	17LX-III-025	ceramic sherd	ceramic	body	1.7	black pigment	Majiayao	fine	red brown
FCN4625	6	2017	Xindian B	Lintao	17LX-III-025	ceramic sherd	ceramic	body	3.1	fine cordmarked	unclear	fine sand	red brown
FCN4625	7	2017	Xindian B	Lintao	17LX-III-025	ceramic sherd	ceramic	body	3.3	plain	unclear	fine	light brown
FCN4625	8	2017	Xindian B	Lintao	17LX-III-025	ceramic sherd	ceramic	body	4.3	fine cordmarked	unclear	fine sand	light brown
FCN4625	9	2017	Xindian B	Lintao	17LX-III-025	ceramic sherd	ceramic	body	3.9	plain	Majiayao	fine	red brown
FCN4625	10	2017	Xindian B	Lintao	17LX-III-025	ceramic sherd	ceramic	body	3	plain	Majiayao	fine	red brown
FCN4625	11	2017	Xindian B	Lintao	17LX-III-025	ceramic sherd	ceramic	body	8.6	cordmarked	unclear	coarse sand	brown
FCN4625	12	2017	Xindian B	Lintao	17LX-III-025	ceramic sherd	ceramic	body	9.9	crossed cordmarked	Majiayao	coarse sand	brown
FCN4625	13	2017	Xindian B	Lintao	17LX-III-025	ceramic sherd	ceramic	body	5.6	fine cordmarked	Majiayao	fine sand	light brown
FCN4625	14	2017	Xindian B	Lintao	17LX-III-025	ceramic sherd	ceramic	body	4.9	plain	Majiayao	fine sand	red brown
FCN4625	15	2017	Xindian B	Lintao	17LX-III-025	ceramic sherd	ceramic	body	7.4	cordmarked	Majiayao	fine sand	light brown
FCN4625	16	2017	Xindian B	Lintao	17LX-III-025	ceramic sherd	ceramic	body	1.2	fine cordmarked	Majiayao	fine sand	brown
FCN4625	17	2017	Xindian B	Lintao	17LX-III-025	ceramic sherd	ceramic	body	1.5	fine cordmarked	Majiayao	fine	red brown
FCN4626	1	2017	Xindian B	Lintao	17LX-III-026	ceramic sherd	ceramic	rim	53	cordmarked	unclear	coarse sand	grey
FCN4627	1	2017	Xindian B	Lintao	17LX-III-027	ceramic sherd	ceramic	rim	50.1	cordmarked+paddle impression	unclear	medium sand	red brown
FCN4628	1	2017	Xindian B	Lintao	17LX-III-030	ceramic sherd	ceramic	body	15	cordmarked	Majiayao	fine sand	grey
FCN4628	2	2017	Xindian B	Lintao	17LX-III-030	ceramic sherd	ceramic	body	7.7	black pigment	Majiayao	fine	grey brown
FCN4628	3	2017	Xindian B	Lintao	17LX-III-030	ceramic sherd	ceramic	rim	5.5	black pigment	Majiayao	fine	light brown
FCN4629	1	2017	Xindian B	Lintao	17LX-III-032	ceramic sherd	ceramic	body	29.7	crossed cordmarked	unclear	coarse sand	red brown
FCN4629	2	2017	Xindian B	Lintao	17LX-III-032	ceramic sherd	ceramic	body	65.4	cordmarked	unclear	coarse sand	red brown
FCN4629	3	2017	Xindian B	Lintao	17LX-III-032	ceramic sherd	ceramic	handle	47.1	plain	Xindian	coarse sand	red brown
FCN4629	4	2017	Xindian B	Lintao	17LX-III-032	ceramic sherd	ceramic	base	212.3	slip+red pigment	Xindian	coarse sand	orange
FCN4629	5	2017	Xindian B	Lintao	17LX-III-032	ceramic sherd	ceramic	body	96.8	slip+cordmarked	Xindian	coarse sand	red brown
FCN4631	1	2017	Xindian B	Lintao	17LX-III-033	bracelet	stone		13.1
FCN4630	1	2017	Xindian B	Lintao	17LX-III-033	ceramic sherd	ceramic	body	7.7	cordmarked	Qijia	fine sand	grey
FCN4630	2	2017	Xindian B	Lintao	17LX-III-033	ceramic sherd	ceramic	body	4.4	fine cordmarked	Majiayao	medium sand	orange
FCN4630	3	2017	Xindian B	Lintao	17LX-III-033	ceramic sherd	ceramic	base	10.8	cordmarked	Xindian	fine sand	grey black
FCN4630	4	2017	Xindian B	Lintao	17LX-III-033	ceramic sherd	ceramic	rim	13.6	slip+red pigment	Xindian	fine sand	light brown
FCN4630	5	2017	Xindian B	Lintao	17LX-III-033	ceramic sherd	ceramic	body	13.1	plain	Xindian	fine sand	brown
FCN4630	6	2017	Xindian B	Lintao	17LX-III-033	ceramic sherd	ceramic	body	2.1	plain	unclear	fine	red brown
FCN4630	7	2017	Xindian B	Lintao	17LX-III-033	ceramic sherd	ceramic	body	3.5	plain	unclear	medium sand	brown
FCN4630	8	2017	Xindian B	Lintao	17LX-III-033	ceramic sherd	ceramic	body	6.1	plain	unclear	medium sand	grey
FCN4630	9	2017	Xindian B	Lintao	17LX-III-033	ceramic sherd	ceramic	body	17.8	fine cordmarked	Xindian	coarse sand	red brown
FCN4630	10	2017	Xindian B	Lintao	17LX-III-033	ceramic sherd	ceramic	body	6.9	fine cordmarked	unclear	fine sand	red
FCN4632	1	2017	Xindian B	Lintao	17LX-III-034	ceramic sherd	ceramic	body	6.7	cordmarked	Majiayao	fine sand	light brown
FCN4632	2	2017	Xindian B	Lintao	17LX-III-034	ceramic sherd	ceramic	body	7.1	black pigment+fine cordmarked	Xindian	fine sand	red brown
FCN4632	3	2017	Xindian B	Lintao	17LX-III-034	ceramic sherd	ceramic	body	2.6	black pigment	Xindian	medium sand	grey
FCN4632	4	2017	Xindian B	Lintao	17LX-III-034	ceramic sherd	ceramic	body	9.2	plain	unclear	fine sand	light brown
FCN4632	5	2017	Xindian B	Lintao	17LX-III-034	ceramic sherd	ceramic	rim	20.9	plain	Majiayao	fine	red brown
FCN4633	1	2017	Xindian B	Lintao	17LX-III-035	ceramic sherd	ceramic	base	90.9	plain	Xindian	fine sand	orange
FCN4633	2	2017	Xindian B	Lintao	17LX-III-035	ceramic sherd	ceramic	body	30.1	black pigment	Majiayao	fine	orange yellow
FCN4633	3	2017	Xindian B	Lintao	17LX-III-035	ceramic sherd	ceramic	body	34.5	plain	Xindian	coarse sand	red
FCN4633	4	2017	Xindian B	Lintao	17LX-III-035	ceramic sherd	ceramic	body	23.5	fine cordmarked	Xindian	coarse sand	red
FCN4633	5	2017	Xindian B	Lintao	17LX-III-035	ceramic sherd	ceramic	body	21.6	fine cordmarked	Qjia	coarse sand	grey
FCN4633	6	2017	Xindian B	Lintao	17LX-III-035	ceramic sherd	ceramic	body	30.7	plain	unclear	coarse sand	orange
FCN4633	7	2017	Xindian B	Lintao	17LX-III-035	ceramic sherd	ceramic	body	15.8	black pigment+polished	Majiayao	fine	brown
FCN4633	8	2017	Xindian B	Lintao	17LX-III-035	ceramic sherd	ceramic	body	23	crossed cordmarked	Majiayao	coarse sand	light brown
FCN4633	9	2017	Xindian B	Lintao	17LX-III-035	ceramic sherd	ceramic	neck	23.4	black pigment	Xindian	fine sand	light brown
FCN4633	10	2017	Xindian B	Lintao	17LX-III-035	ceramic sherd	ceramic	handle	10.5	black pigment	Majiayao	fine	orange yellow
FCN4633	11	2017	Xindian B	Lintao	17LX-III-035	ceramic sherd	ceramic	rim	20	black pigment	Xindian	fine sand	orange
FCN4633	12	2017	Xindian B	Lintao	17LX-III-035	ceramic sherd	ceramic	body	6.5	black pigment+polished	Majiayao	fine	orange
FCN4633	13	2017	Xindian B	Lintao	17LX-III-035	ceramic sherd	ceramic	body	7	polish	Xindian	fine	orange yellow
FCN4633	14	2017	Xindian B	Lintao	17LX-III-035	ceramic sherd	ceramic	body	14	slip+black pigment	unclear	fine sand	light brown
FCN4633	15	2017	Xindian B	Lintao	17LX-III-035	ceramic sherd	ceramic	body	5.5	plain	Xindian	fine	orange
FCN4633	16	2017	Xindian B	Lintao	17LX-III-035	ceramic sherd	ceramic	body	24.7	fine cordmarked	Xindian	fine sand	orange
FCN4633	17	2017	Xindian B	Lintao	17LX-III-035	ceramic sherd	ceramic	body	5.2	plain	unclear	fine	grey
FCN4633	18	2017	Xindian B	Lintao	17LX-III-035	ceramic sherd	ceramic	body	6.1	crossed cordmarked	Qjia	coarse sand	brown
FCN4633	19	2017	Xindian B	Lintao	17LX-III-035	ceramic sherd	ceramic	body	34.2	fine cordmarked	Xindian	fine sand	orange
FCN4633	20	2017	Xindian B	Lintao	17LX-III-035	ceramic sherd	ceramic	body	11.7	black pigment	Xindian	fine sand	orange
FCN4633	21	2017	Xindian B	Lintao	17LX-III-035	ceramic sherd	ceramic	base	18.6	slip	unclear	fine sand	orange
FCN4633	22	2017	Xindian B	Lintao	17LX-III-035	ceramic sherd	ceramic	body	11	appliqué+cordmarked	Xindian	fine	brown
FCN4633	23	2017	Xindian B	Lintao	17LX-III-035	ceramic sherd	ceramic	body	6.1	crossed cordmarked	Qjia	fine sand	orange yellow
FCN4633	24	2017	Xindian B	Lintao	17LX-III-035	ceramic sherd	ceramic	body	4.5	plain	Xindian	coarse sand	orange
FCN4633	25	2017	Xindian B	Lintao	17LX-III-035	ceramic sherd	ceramic	body	3.9	plain	unclear	coarse sand	orange
FCN4633	26	2017	Xindian B	Lintao	17LX-III-035	ceramic sherd	ceramic	body	3.1	fine cordmarked	unclear	coarse sand	orange
FCN4633	27	2017	Xindian B	Lintao	17LX-III-035	ceramic sherd	ceramic	body	5.5	black pigment	Xindian	fine sand	light brown
FCN4633	28	2017	Xindian B	Lintao	17LX-III-035	ceramic sherd	ceramic	body	4.3	plain	unclear	fine	brown
FCN4633	29	2017	Xindian B	Lintao	17LX-III-035	ceramic sherd	ceramic	body	4.1	crossed cordmarked	Qjia	fine sand	orange
FCN4633	30	2017	Xindian B	Lintao	17LX-III-035	ceramic sherd	ceramic	body	4	plain	unclear	fine sand	grey
FCN4633	31	2017	Xindian B	Lintao	17LX-III-035	ceramic sherd	ceramic	body	9.2	plain	unclear	fine	orange yellow
FCN4633	32	2017	Xindian B	Lintao	17LX-III-035	ceramic sherd	ceramic	body	2.2	brown pigment+slip	Majiayao	fine	yellow brown
FCN4633	33	2017	Xindian B	Lintao	17LX-III-035	ceramic sherd	ceramic	body	5	polish	Qjia	fine	orange
FCN4633	34	2017	Xindian B	Lintao	17LX-III-035	ceramic sherd	ceramic	body	7.5	plain	unclear	fine sand	brown
FCN4633	35	2017	Xindian B	Lintao	17LX-III-035	ceramic sherd	ceramic	body	7.4	fine cordmarked	Majiayao	fine sand	orange
FCN4633	36	2017	Xindian B	Lintao	17LX-III-035	ceramic sherd	ceramic	body	5.2	fine cordmarked	Majiayao	coarse sand	orange
FCN4633	37	2017	Xindian B	Lintao	17LX-III-035	ceramic sherd	ceramic	body	8.2	crossed cordmarked	Majiayao	coarse sand	brown
FCN4633	38	2017	Xindian B	Lintao	17LX-III-035	ceramic sherd	ceramic	shoulder	12.3	plain	unclear	fine	grey
FCN4633	39	2017	Xindian B	Lintao	17LX-III-035	ceramic sherd	ceramic	body	7.2	fine cordmarked	unclear	coarse sand	orange yellow
FCN4633	40	2017	Xindian B	Lintao	17LX-III-035	ceramic sherd	ceramic	neck	11.4	fine cordmarked	unclear	fine sand	brown
FCN4633	41	2017	Xindian B	Lintao	17LX-III-035	ceramic sherd	ceramic	body	5.4	plain	unclear	coarse sand	orange
FCN4633	42	2017	Xindian B	Lintao	17LX-III-035	ceramic sherd	ceramic	body	23	slip	unclear	coarse sand	brown
FCN4633	43	2017	Xindian B	Lintao	17LX-III-035	ceramic sherd	ceramic	body	18.4	crossed cordmarked	Majiayao	coarse sand	brown
FCN4633	44	2017	Xindian B	Lintao	17LX-III-035	ceramic sherd	ceramic	rim	27	plain	Xindian	fine sand	orange
FCN4633	45	2017	Xindian B	Lintao	17LX-III-035	ceramic sherd	ceramic	rim	16.7	pinched decorated rim	unclear	fine sand	orange
FCN4633	46	2017	Xindian B	Lintao	17LX-III-035	ceramic sherd	ceramic	body	8.9	plain	Majiayao	fine sand	orange
FCN4633	47	2017	Xindian B	Lintao	17LX-III-035	ceramic sherd	ceramic	body	7.6	plain	Qjia	coarse sand	light brown
FCN4633	48	2017	Xindian B	Lintao	17LX-III-035	ceramic sherd	ceramic	body	13.6	fine cordmarked	Majiayao	fine sand	orange
FCN4633	49	2017	Xindian B	Lintao	17LX-III-035	ceramic sherd	ceramic	body	24.7	slip	Qjia	coarse sand	orange
FCN4633	50	2017	Xindian B	Lintao	17LX-III-035	ceramic sherd	ceramic	body	7.6	cordmarked	unclear	coarse sand	orange
FCN4633	51	2017	Xindian B	Lintao	17LX-III-035	ceramic sherd	ceramic	body	6.4	cordmarked	Qjia	fine sand	brown
FCN4633	52	2017	Xindian B	Lintao	17LX-III-035	ceramic sherd	ceramic	rim	4.6	plain	unclear	fine sand	orange
FCN4633	53	2017	Xindian B	Lintao	17LX-III-035	ceramic sherd	ceramic	body	4.2	black pigment	Xindian	fine	orange
FCN4633	54	2017	Xindian B	Lintao	17LX-III-035	ceramic sherd	ceramic	body	2.7	cordmarked+black pigment	Qjia	fine sand	brown
FCN4633	55	2017	Xindian B	Lintao	17LX-III-035	ceramic sherd	ceramic	body	17.8	plain	Qjia	fine sand	orange
FCN4633	56	2017	Xindian B	Lintao	17LX-III-035	ceramic sherd	ceramic	body	6.5	fine cordmarked+slip	Qjia	fine sand	orange
FCN4633	57	2017	Xindian B	Lintao	17LX-III-035	ceramic sherd	ceramic	body	9.5	plain	unclear	fine sand	orange
FCN4633	58	2017	Xindian B	Lintao	17LX-III-035	ceramic sherd	ceramic	body	6	plain	unclear	fine sand	orange yellow
FCN4633	59	2017	Xindian B	Lintao	17LX-III-035	ceramic sherd	ceramic	handle	6.7	appliqué+pinched	Qjia	fine	orange yellow
FCN4633	60	2017	Xindian B	Lintao	17LX-III-035	ceramic sherd	ceramic	body	9.4	fine cordmarked	Majiayao	fine sand	orange
FCN4633	61	2017	Xindian B	Lintao	17LX-III-035	ceramic sherd	ceramic	body	12.3	slip	Xindian	fine sand	orange
FCN4633	62	2017	Xindian B	Lintao	17LX-III-035	ceramic sherd	ceramic	body	4.4	plain	Majiayao	fine	orange yellow
FCN4634	1	2017	Xindian B	Lintao	17LX-III-036	ceramic sherd	ceramic	body	6.9	black pigment	Majiayao	fine sand	light brown
FCN4634	2	2017	Xindian B	Lintao	17LX-III-036	ceramic sherd	ceramic	body	3.5	black pigment	Majiayao	fine sand	light brown
FCN4634	3	2017	Xindian B	Lintao	17LX-III-036	ceramic sherd	ceramic	body	2.8	black pigment	Majiayao	fine sand	light brown
FCN4634	4	2017	Xindian B	Lintao	17LX-III-036	ceramic sherd	ceramic	body	1.6	polish+black pigment	Majiayao	fine	yellow brown
FCN4634	5	2017	Xindian B	Lintao	17LX-III-036	ceramic sherd	ceramic	body	4.8	cordmarked	Majiayao	fine sand	light brown
FCN4634	6	2017	Xindian B	Lintao	17LX-III-036	ceramic sherd	ceramic	body	5.5	fine cordmarked	Majiayao	fine sand	red brown (grey)
FCN4634	7	2017	Xindian B	Lintao	17LX-III-036	ceramic sherd	ceramic	body	9.4	cordmarked	Majiayao	fine sand	light brown
FCN4634	8	2017	Xindian B	Lintao	17LX-III-036	ceramic sherd	ceramic	body	15	crossed cordmarked+appliqué	Xindian	coarse sand	light brown
FCN4634	9	2017	Xindian B	Lintao	17LX-III-036	ceramic sherd	ceramic	body	6.7	fine cordmarked	Majiayao	fine sand	grey brown
FCN4634	10	2017	Xindian B	Lintao	17LX-III-036	ceramic sherd	ceramic	body	4.4	fine cordmarked	Majiayao	fine sand	red brown
FCN4634	11	2017	Xindian B	Lintao	17LX-III-036	ceramic sherd	ceramic	rim	12.4	plain	unclear	medium sand	red brown
FCN4634	12	2017	Xindian B	Lintao	17LX-III-036	ceramic sherd	ceramic	handle	6.1	appliqué+paddle impressions	Qjia	fine	light brown
FCN4634	13	2017	Xindian B	Lintao	17LX-III-036	ceramic sherd	ceramic	body	5.7	fine cordmarked	Majiayao	fine sand	light brown
FCN4634	14	2017	Xindian B	Lintao	17LX-III-036	ceramic sherd	ceramic	body	4.4	fine cordmarked	Majiayao	fine sand	red brown
FCN4634	15	2017	Xindian B	Lintao	17LX-III-036	ceramic sherd	ceramic	body	4.2	fine cordmarked	Majiayao	fine sand	orange
FCN4634	16	2017	Xindian B	Lintao	17LX-III-036	ceramic sherd	ceramic	body	15.5	cordmarked	unclear	medium sand	red
FCN4634	17	2017	Xindian B	Lintao	17LX-III-036	ceramic sherd	ceramic	body	9.3	fine cordmarked	Majiayao	medium sand	light brown
FCN4634	18	2017	Xindian B	Lintao	17LX-III-036	ceramic sherd	ceramic	body	3.3	plain	Majiayao	fine sand	red brown
FCN4634	19	2017	Xindian B	Lintao	17LX-III-036	ceramic sherd	ceramic	body	3.8	fine cordmarked	Majiayao	fine sand	grey
FCN4634	20	2017	Xindian B	Lintao	17LX-III-036	ceramic sherd	ceramic	body	8.1	plain	Majiayao	fine sand	light brown
FCN4634	21	2017	Xindian B	Lintao	17LX-III-036	ceramic sherd	ceramic	body	11.6	plain	Xindian	coarse sand	red brown
FCN4634	22	2017	Xindian B	Lintao	17LX-III-036	ceramic sherd	ceramic	body	19	cordmarked+appliqué	Majiayao	coarse sand	grey
FCN4634	23	2017	Xindian B	Lintao	17LX-III-036	ceramic sherd	ceramic	body	6.2	plain	unclear	medium sand	red brown
FCN4634	24	2017	Xindian B	Lintao	17LX-III-036	ceramic sherd	ceramic	body	1.8	plain	Majiayao	fine	red brown
FCN4634	25	2017	Xindian B	Lintao	17LX-III-036	ceramic sherd	ceramic	body	2.8	plain	Majiayao	fine sand	light brown
FCN4634	26	2017	Xindian B	Lintao	17LX-III-036	ceramic sherd	ceramic	body	5.8	fine cordmarked	Majiayao	fine sand	red brown
FCN4634	27	2017	Xindian B	Lintao	17LX-III-036	ceramic sherd	ceramic	body	10.2	black pigment	Majiayao	fine	grey
FCN4634	28	2017	Xindian B	Lintao	17LX-III-036	ceramic sherd	ceramic	body	9.1	plain	unclear	medium sand	red brown
FCN4634	29	2017	Xindian B	Lintao	17LX-III-036	ceramic sherd	ceramic	body	2.4	red pigment	Xindian	fine sand	orange
FCN4634	30	2017	Xindian B	Lintao	17LX-III-036	ceramic sherd	ceramic	body	4.3	red pigment	Xindian	medium sand	red brown
FCN4634	31	2017	Xindian B	Lintao	17LX-III-036	ceramic sherd	ceramic	body	4	fine cordmarked	Xindian	medium sand	red brown
FCN4634	32	2017	Xindian B	Lintao	17LX-III-036	ceramic sherd	ceramic	body	5.8	plain	unclear	medium sand	red brown
FCN4634	33	2017	Xindian B	Lintao	17LX-III-036	ceramic sherd	ceramic	body	4.3	fine cordmarked	Qjia	fine sand	light brown
FCN4634	34	2017	Xindian B	Lintao	17LX-III-036	ceramic sherd	ceramic	body	13.4	plain	unclear	fine sand	grey
FCN4634	35	2017	Xindian B	Lintao	17LX-III-036	ceramic sherd	ceramic	body	4.1	plain	unclear	medium sand	red brown
FCN4634	36	2017	Xindian B	Lintao	17LX-III-036	ceramic sherd	ceramic	body	2.4	slip	Xindian	fine sand	red brown
FCN4634	37	2017	Xindian B	Lintao	17LX-III-036	ceramic sherd	ceramic	body	13	plain	unclear	fine	grey
FCN4634	38	2017	Xindian B	Lintao	17LX-III-036	ceramic sherd	ceramic	body	2.9	plain	Qjia	fine sand	light brown
FCN4634	39	2017	Xindian B	Lintao	17LX-III-036	ceramic sherd	ceramic	body	2.7	plain	Qjia	fine sand	light brown
FCN4634	40	2017	Xindian B	Lintao	17LX-III-036	ceramic sherd	ceramic	body	2.8	black pigment	Xindian	medium sand	red brown
FCN4634	41	2017	Xindian B	Lintao	17LX-III-036	ceramic sherd	ceramic	body	4.2	plain	Xindian	medium sand	light brown
FCN4634	42	2017	Xindian B	Lintao	17LX-III-036	ceramic sherd	ceramic	body	9.9	pigment	Xindian	medium sand	red brown
FCN4634	43	2017	Xindian B	Lintao	17LX-III-036	ceramic sherd	ceramic	body	8.3	fine cordmarked+pigment	Xindian	coarse sand	red brown
FCN4634	44	2017	Xindian B	Lintao	17LX-III-036	ceramic sherd	ceramic	body	2.8	plain	Majiayao	fine sand	red brown
FCN4635	1	2017	Xindian B	Lintao	17LX-III-037	ceramic sherd	ceramic	base	68	crossed cordmarked	Majiayao	coarse sand	grey
FCN4635	2	2017	Xindian B	Lintao	17LX-III-037	ceramic sherd	ceramic	base	59	cordmarked	Majiayao	coarse sand	red brown
FCN4638	1	2017	Xindian B	Lintao	17LX-III-040	ceramic sherd	ceramic	body	72.9	cordmarked	Xindian	coarse sand	red brown
FCN4636	1	2017	Xindian B	Lintao	17LX-III-041	ceramic sherd	ceramic	body	56.4	cordmarked+appliqué	Majiayao	coarse sand	brown
FCN4636	2	2017	Xindian B	Lintao	17LX-III-041	ceramic sherd	ceramic	neck	9.1	plain	unclear	medium sand	red brown
FCN4636	3	2017	Xindian B	Lintao	17LX-III-041	ceramic sherd	ceramic	body	11.7	plain	unclear	medium sand	red brown
FCN4636	4	2017	Xindian B	Lintao	17LX-III-041	ceramic sherd	ceramic	body	6	black pigment	Majiayao	fine	light brown
FCN4636	5	2017	Xindian B	Lintao	17LX-III-041	ceramic sherd	ceramic	body	18.4	plain	unclear	fine sand	grey brown
FCN4636	6	2017	Xindian B	Lintao	17LX-III-041	ceramic sherd	ceramic	body	20	plain	Majiayao	fine	red brown
FCN4637	1	2017	Xindian B	Lintao	17LX-III-042	ceramic sherd	ceramic	base	40.1	plain	unclear	fine sand	red brown
FCN4637	2	2017	Xindian B	Lintao	17LX-III-042	ceramic sherd	ceramic	body	6.2	plain	Majiayao	fine	light brown
FCN4637	3	2017	Xindian B	Lintao	17LX-III-042	ceramic sherd	ceramic	body	32.3	slip+red pigment	Xindian	coarse sand	red brown
FCN4637	4	2017	Xindian B	Lintao	17LX-III-042	ceramic sherd	ceramic	body	11.7	plain	Majiayao	fine sand	light brown
FCN4637	5	2017	Xindian B	Lintao	17LX-III-042	ceramic sherd	ceramic	body	10.9	cordmarked	Qjia	medium sand	grey
FCN4637	6	2017	Xindian B	Lintao	17LX-III-042	ceramic sherd	ceramic	body	14.9	crossed cordmarked	Qjia	coarse sand	grey
FCN4639	1	2017	Xindian B	Lintao	17LX-III-043	ceramic sherd	ceramic	body	8.6	polish+black pigment	Majiayao	fine	light brown
FCN4639	2	2017	Xindian B	Lintao	17LX-III-043	ceramic sherd	ceramic	body	18.8	slip+black pigment	Xindian	coarse sand	red brown
FCN4639	3	2017	Xindian B	Lintao	17LX-III-043	ceramic sherd	ceramic	body	6.1	black pigment	Xindian	fine sand	red brown
FCN4639	4	2017	Xindian B	Lintao	17LX-III-043	ceramic sherd	ceramic	body	25	appliqué+cordmarked	Majiayao	coarse sand	grey
FCN4639	5	2017	Xindian B	Lintao	17LX-III-043	ceramic sherd	ceramic	rim	9	appliqué+paddle impressions	unclear	fine sand	light brown
FCN4639	6	2017	Xindian B	Lintao	17LX-III-043	ceramic sherd	ceramic	body	2.2	black pigment	Majiayao	fine	yellow brown
FCN4639	7	2017	Xindian B	Lintao	17LX-III-043	ceramic sherd	ceramic	body	3.2	black pigment	Xindian	fine sand	red brown
FCN4639	8	2017	Xindian B	Lintao	17LX-III-043	ceramic sherd	ceramic	body	1.8	black pigment	Majiayao	fine	light brown
FCN4639	9	2017	Xindian B	Lintao	17LX-III-043	ceramic sherd	ceramic	body	0.9	black pigment	Majiayao	fine	light brown
FCN4639	10	2017	Xindian B	Lintao	17LX-III-043	ceramic sherd	ceramic	base	3.4	plain	Xindian	fine	red brown

## Sheet: AppendixII_Huizuiwa_finds
Collection number	Item number	Collection year	Site	County	Collection unit	Collection method	Object type	Material type	Object part	Weight (g)	Surface	Period	Paste	Color
FCN0002	1	2012	Huizuiwa	Lintao	12LH-001	Surface collection	Ceramic sherd	ceramic	rim		appliqué + impressed	Xindian/Siwa	medium sand	red brown
FCN0002	2	2012	Huizuiwa	Lintao	12LH-002	Surface collection	Ceramic sherd	ceramic	rim		cordmarked + appliqué + impressed	Xindian	medium sand	red brown
FCN0002	3	2012	Huizuiwa	Lintao	12LH-003	Surface collection	stone disk	stone			N/A	Xindian	stone	N/A
FCN0002	4	2012	Huizuiwa	Lintao	12LH-004	Surface collection	stone knife	stone			N/A	Xindian	stone	N/A
FCN0002	5	2012	Huizuiwa	Lintao	12LH-005	Surface collection	Ceramic sherd	ceramic	handle		black pigment	Xindian	medium sand	red brown
FCN0002	6	2012	Huizuiwa	Lintao	12LH-006	Surface collection	Ceramic sherd	ceramic	rim		appliqué + impressed	Xindian	medium sand	red brown
FCN0002	7	2012	Huizuiwa	Lintao	12LH-007	Surface collection	Ceramic sherd	ceramic	rim		appliqué + impressed	Xindian	medium sand	red brown
FCN0002	8	2012	Huizuiwa	Lintao	12LH-008	Surface collection	Ceramic sherd	ceramic	rim		black pigment	Xindian	medium sand	red brown
FCN0002	9	2012	Huizuiwa	Lintao	12LH-009	Surface collection	Ceramic sherd	ceramic	neck		black pigment	Xindian	fine	orange yellow
FCN0002	10	2012	Huizuiwa	Lintao	12LH-010	Surface collection	Ceramic sherd	ceramic	foot		plain	Xindian	medium sand	red brown
FCN0002	11	2012	Huizuiwa	Lintao	12LH-011	Surface collection	Ceramic sherd	ceramic	base		cordmarked	post Warring States	fine	grey brown
FCN0002	12	2012	Huizuiwa	Lintao	12LH-012	Surface collection	Ceramic sherd	ceramic	rim		plain	Xindian	medium sand	red brown
FCN0002	13	2012	Huizuiwa	Lintao	12LH-013	Surface collection	Ceramic sherd	ceramic	handle		brown pigment	Xindian	fine	orange yellow
FCN0002	14	2012	Huizuiwa	Lintao	12LH-014	Surface collection	Ceramic sherd	ceramic	neck		black pigment	Xindian	medium sand	brown
FCN0002	15	2012	Huizuiwa	Lintao	12LH-015	Surface collection	Ceramic sherd	ceramic	rim		cordmarked + appliqué + impressed	Xindian	fine sand	orange
FCN0002	16	2012	Huizuiwa	Lintao	12LH-016	Surface collection	Ceramic sherd	ceramic	shoulder		incisions	post Warring States	fine sand	grey
FCN0002	17	2012	Huizuiwa	Lintao	12LH-017	Surface collection	Ceramic sherd	ceramic	shoulder		black pigment	Xindian	fine	brown
FCN0002	18	2012	Huizuiwa	Lintao	12LH-018	Surface collection	Ceramic sherd	ceramic	shoulder		black pigment	Xindian	fine	yellow brown
FCN0002	19	2012	Huizuiwa	Lintao	12LH-019	Surface collection	Ceramic sherd	ceramic	rim		plain	post Warring States	fine	grey
FCN0002	20	2012	Huizuiwa	Lintao	12LH-020	Surface collection	Ceramic sherd	ceramic	rim		cordmarked + appliqué	Xindian	fine	red
FCN0002	21	2012	Huizuiwa	Lintao	12LH-021	Surface collection	Ceramic sherd	ceramic	foot		plain	Xindian	fine sand	red brown
FCN0002	22	2012	Huizuiwa	Lintao	12LH-022	Surface collection	Ceramic sherd	ceramic	shoulder		black pigment	Xindian	fine sand	red
FCN0002	23	2012	Huizuiwa	Lintao	12LH-023	Surface collection	Ceramic sherd	ceramic	foot		plain	Xindian	fine sand	red brown
FCN0002	24	2012	Huizuiwa	Lintao	12LH-024	Surface collection	Ceramic sherd	ceramic	shoulder		cordmarked	post Warring States	fine	grey
FCN0002	25	2012	Huizuiwa	Lintao	12LH-025	Surface collection	Ceramic sherd	ceramic	rim		appliqué + impressed	Xindian	medium sand	orange yellow
FCN0002	26	2012	Huizuiwa	Lintao	12LH-026	Surface collection	Ceramic sherd	ceramic	shoulder		appliqué	Xindian	fine sand	grey brown
FCN0002	27	2012	Huizuiwa	Lintao	12LH-027	Surface collection	Ceramic sherd	ceramic	handle		slip + white pigment	Xindian	medium sand	brown
FCN0002	28	2012	Huizuiwa	Lintao	12LH-028	Surface collection	Ceramic sherd	ceramic	rim		appliqué + impressed	Xindian	medium sand	grey
FCN0002	29	2012	Huizuiwa	Lintao	12LH-029	Surface collection	Ceramic sherd	ceramic	rim		cordmarked + appliqué + impressed	Xindian	medium sand	red brown
FCN0002	30	2012	Huizuiwa	Lintao	12LH-030	Surface collection	Ceramic sherd	ceramic	foot		plain	Xindian	medium sand	brown
FCN0002	31	2012	Huizuiwa	Lintao	12LH-031	Surface collection	Ceramic sherd	ceramic	handle		plain	Xindian	medium sand	red brown
FCN0002	32	2012	Huizuiwa	Lintao	12LH-032	Surface collection	Ceramic sherd	ceramic	shoulder		black pigment	Xindian	medium sand	red brown
FCN0002	33	2012	Huizuiwa	Lintao	12LH-033	Surface collection	Ceramic sherd	ceramic	rim		cordmarked	Xindian	medium sand	black
FCN0002	34	2012	Huizuiwa	Lintao	12LH-034	Surface collection	Ceramic sherd	ceramic	handle		plain	Xindian	medium sand	orange
FCN0002	35	2012	Huizuiwa	Lintao	12LH-035	Surface collection	Ceramic sherd	ceramic	shoulder		black pigment	Xindian	medium sand	yellow brown
FCN0002	36	2012	Huizuiwa	Lintao	12LH-036	Surface collection	Ceramic sherd	ceramic	handle		black pigment	Xindian	fine	red
FCN0002	37	2012	Huizuiwa	Lintao	12LH-037	Surface collection	Ceramic sherd	ceramic	shoulder		black pigment	Xindian	fine	red brown
FCN0002	38	2012	Huizuiwa	Lintao	12LH-038	Surface collection	Ceramic sherd	ceramic	shoulder		black pigment	Xindian	medium sand	red brown
FCN0002	39	2012	Huizuiwa	Lintao	12LH-039	Surface collection	Ceramic sherd	ceramic	foot		plain	Xindian	medium sand	grey
FCN0002	40	2012	Huizuiwa	Lintao	12LH-040	Surface collection	Ceramic sherd	ceramic	shoulder		black pigment	Xindian	fine	red brown
FCN0002	41	2012	Huizuiwa	Lintao	12LH-041	Surface collection	Ceramic sherd	ceramic	handle		black pigment	Xindian	fine	red brown
FCN0002	42	2012	Huizuiwa	Lintao	12LH-042	Surface collection	Ceramic sherd	ceramic	handle		crossed cordmarked	Xindian	medium sand	grey
FCN0002	43	2012	Huizuiwa	Lintao	12LH-043	Surface collection	Ceramic sherd	ceramic	handle		black pigment	Xindian	fine sand	orange yellow
FCN0002	44	2012	Huizuiwa	Lintao	12LH-044	Surface collection	Ceramic sherd	ceramic	shoulder		crossed cordmarked	post Warring States	fine	grey
FCN0001	1	2012	Huizuiwa	Lintao	12LH-S001	Surface collection	Ceramic sherd	ceramic	shoulder		cordmarked	Xindian	medium sand	brown
FCN0001	2	2012	Huizuiwa	Lintao	12LH-S002	Surface collection	Ceramic sherd	ceramic	shoulder		plain	Xindian	medium sand	brown
FCN0001	3	2012	Huizuiwa	Lintao	12LH-S003	Surface collection	Ceramic sherd	ceramic	shoulder		cordmarked	Xindian	medium sand	brown
FCN0001	4	2012	Huizuiwa	Lintao	12LH-S004	Surface collection	Ceramic sherd	ceramic	shoulder		cordmarked	Xindian	medium sand	grey brown
FCN0001	5	2012	Huizuiwa	Lintao	12LH-S005	Surface collection	Ceramic sherd	ceramic	shoulder		cordmarked	Xindian	medium sand	grey brown
FCN0001	6	2012	Huizuiwa	Lintao	12LH-S006	Surface collection	Ceramic sherd	ceramic	shoulder		cordmarked	Xindian	medium sand	grey brown
FCN2388	1	2014	Huizuiwa	Lintao	14LH-II(C005)-002	Surface collection	Ceramic sherd	ceramic	body	9.5	fine cordmarked	Qijia	coarse sand	red brown
FCN2388	2	2014	Huizuiwa	Lintao	14LH-II(C005)-002	Surface collection	Ceramic sherd	ceramic	body	7.2	plain	Qijia	fine sand	red brown
FCN2388	3	2014	Huizuiwa	Lintao	14LH-II(C005)-002	Surface collection	Ceramic sherd	ceramic	body	3.6	plain	unclear	fine sand	red brown
FCN4719	33	2017	Huizuiwa	Lintao	17LH-T01-L06	Layer 3	Ceramic sherd	ceramic	body	16.5	appliqué	Xindian	fine sand	orange yellow
FCN4719	23	2017	Huizuiwa	Lintao	17LH-T01-L06	Layer 3	Ceramic sherd	ceramic	body	2.1	black pigment	Xindian	medium sand	orange yellow
FCN4719	1	2017	Huizuiwa	Lintao	17LH-T01-L06	Layer 3	Ceramic sherd	ceramic	body	24	black pigment	Xindian	medium sand	orange yellow
FCN4719	97	2017	Huizuiwa	Lintao	17LH-T01-L06	Layer 3	Ceramic sherd	ceramic	body	1.5	black pigment	Xindian	fine	orange
FCN4719	118	2017	Huizuiwa	Lintao	17LH-T01-L06	Layer 3	Ceramic sherd	ceramic	body	0.4	black pigment	Xindian	fine	orange
FCN4719	20	2017	Huizuiwa	Lintao	17LH-T01-L06	Layer 3	Ceramic sherd	ceramic	body	0.6	black pigment	Xindian	fine	orange yellow
FCN4719	21	2017	Huizuiwa	Lintao	17LH-T01-L06	Layer 3	Ceramic sherd	ceramic	body	1.2	black pigment	Xindian	fine	orange yellow
FCN4719	25	2017	Huizuiwa	Lintao	17LH-T01-L06	Layer 3	Ceramic sherd	ceramic	body	1	black pigment	Xindian	fine	orange yellow
FCN4719	26	2017	Huizuiwa	Lintao	17LH-T01-L06	Layer 3	Ceramic sherd	ceramic	body	1.1	black pigment	Xindian	fine	orange yellow
FCN4719	27	2017	Huizuiwa	Lintao	17LH-T01-L06	Layer 3	Ceramic sherd	ceramic	body	0.6	black pigment	Xindian	fine	orange yellow
FCN4719	29	2017	Huizuiwa	Lintao	17LH-T01-L06	Layer 3	Ceramic sherd	ceramic	body	1	black pigment	Xindian	fine	orange yellow
FCN4719	30	2017	Huizuiwa	Lintao	17LH-T01-L06	Layer 3	Ceramic sherd	ceramic	body	1.2	black pigment	Xindian	fine	orange yellow
FCN4719	31	2017	Huizuiwa	Lintao	17LH-T01-L06	Layer 3	Ceramic sherd	ceramic	body	0.4	black pigment	Xindian	fine	orange yellow
FCN4719	109	2017	Huizuiwa	Lintao	17LH-T01-L06	Layer 3	Ceramic sherd	ceramic	body	1.2	black pigment	Xindian	fine	orange yellow
FCN4719	115	2017	Huizuiwa	Lintao	17LH-T01-L06	Layer 3	Ceramic sherd	ceramic	body	0.5	black pigment	Xindian	fine	orange yellow
FCN4719	6	2017	Huizuiwa	Lintao	17LH-T01-L06	Layer 3	Ceramic sherd	ceramic	body	1.3	black pigment	Xindian	fine	orange yellow
FCN4719	32	2017	Huizuiwa	Lintao	17LH-T01-L06	Layer 3	Ceramic sherd	ceramic	body	0.7	black pigment	Xindian	fine	orange yellow
FCN4719	87	2017	Huizuiwa	Lintao	17LH-T01-L06	Layer 3	Ceramic sherd	ceramic	body	2.5	black pigment	Xindian	fine sand	grey
FCN4719	56	2017	Huizuiwa	Lintao	17LH-T01-L06	Layer 3	Ceramic sherd	ceramic	body	3.7	black pigment	Xindian	fine sand	orange
FCN4719	68	2017	Huizuiwa	Lintao	17LH-T01-L06	Layer 3	Ceramic sherd	ceramic	body	3	black pigment	Xindian	fine sand	orange
FCN4719	76	2017	Huizuiwa	Lintao	17LH-T01-L06	Layer 3	Ceramic sherd	ceramic	body	0.9	black pigment	Xindian	fine sand	orange
FCN4719	98	2017	Huizuiwa	Lintao	17LH-T01-L06	Layer 3	Ceramic sherd	ceramic	body	1.3	black pigment	Xindian	fine sand	orange
FCN4719	110	2017	Huizuiwa	Lintao	17LH-T01-L06	Layer 3	Ceramic sherd	ceramic	body	0.9	black pigment	Xindian	fine sand	orange
FCN4719	116	2017	Huizuiwa	Lintao	17LH-T01-L06	Layer 3	Ceramic sherd	ceramic	body	0.7	black pigment	Xindian	fine sand	orange
FCN4719	119	2017	Huizuiwa	Lintao	17LH-T01-L06	Layer 3	Ceramic sherd	ceramic	body	0.8	black pigment	Xindian	fine sand	orange
FCN4719	2	2017	Huizuiwa	Lintao	17LH-T01-L06	Layer 3	Ceramic sherd	ceramic	body	7	black pigment	Xindian	fine sand	orange
FCN4719	13	2017	Huizuiwa	Lintao	17LH-T01-L06	Layer 3	Ceramic sherd	ceramic	body	3.1	black pigment	Xindian	fine sand	orange yellow
FCN4719	16	2017	Huizuiwa	Lintao	17LH-T01-L06	Layer 3	Ceramic sherd	ceramic	body	2.1	black pigment	Xindian	fine sand	orange yellow
FCN4719	17	2017	Huizuiwa	Lintao	17LH-T01-L06	Layer 3	Ceramic sherd	ceramic	body	1.6	black pigment	Xindian	fine sand	orange yellow
FCN4719	18	2017	Huizuiwa	Lintao	17LH-T01-L06	Layer 3	Ceramic sherd	ceramic	body	4.7	black pigment	Xindian	fine sand	orange yellow
FCN4719	19	2017	Huizuiwa	Lintao	17LH-T01-L06	Layer 3	Ceramic sherd	ceramic	body	2.1	black pigment	Xindian	fine sand	orange yellow
FCN4719	22	2017	Huizuiwa	Lintao	17LH-T01-L06	Layer 3	Ceramic sherd	ceramic	body	2.6	black pigment	Xindian	fine sand	orange yellow
FCN4719	24	2017	Huizuiwa	Lintao	17LH-T01-L06	Layer 3	Ceramic sherd	ceramic	body	2.4	black pigment	Xindian	fine sand	orange yellow
FCN4719	28	2017	Huizuiwa	Lintao	17LH-T01-L06	Layer 3	Ceramic sherd	ceramic	body	1.1	black pigment	Xindian	fine sand	orange yellow
FCN4719	78	2017	Huizuiwa	Lintao	17LH-T01-L06	Layer 3	Ceramic sherd	ceramic	body	0.8	black pigment	Xindian	fine sand	orange yellow
FCN4719	63	2017	Huizuiwa	Lintao	17LH-T01-L06	Layer 3	Ceramic sherd	ceramic	body	3.5	black pigment	Xindian	fine sand	yellow brown
FCN4719	10	2017	Huizuiwa	Lintao	17LH-T01-L06	Layer 3	Ceramic sherd	ceramic	body	10.7	black pigment + fine cordmarked	Xindian	fine sand	brown
FCN4719	12	2017	Huizuiwa	Lintao	17LH-T01-L06	Layer 3	Ceramic sherd	ceramic	body	9.2	black pigment + fine cordmarked	Xindian	fine sand	orange
FCN4719	15	2017	Huizuiwa	Lintao	17LH-T01-L06	Layer 3	Ceramic sherd	ceramic	body	1.3	black pigment + fine cordmarked	Xindian	fine sand	orange yellow
FCN4719	107	2017	Huizuiwa	Lintao	17LH-T01-L06	Layer 3	Ceramic sherd	ceramic	body	1.4	black pigment + white pigment	Xindian	fine sand	orange
FCN4719	49	2017	Huizuiwa	Lintao	17LH-T01-L06	Layer 3	Ceramic sherd	ceramic	body	7.3	cordmarked	Xindian	fine sand	orange
FCN4719	4	2017	Huizuiwa	Lintao	17LH-T01-L06	Layer 3	Ceramic sherd	ceramic	body	12.7	fine cordmarked	Xindian	medium sand	brown
FCN4719	46	2017	Huizuiwa	Lintao	17LH-T01-L06	Layer 3	Ceramic sherd	ceramic	body	9.6	fine cordmarked	Xindian	medium sand	grey
FCN4719	38	2017	Huizuiwa	Lintao	17LH-T01-L06	Layer 3	Ceramic sherd	ceramic	body	41.7	fine cordmarked	Xindian	medium sand	orange
FCN4719	43	2017	Huizuiwa	Lintao	17LH-T01-L06	Layer 3	Ceramic sherd	ceramic	body	11.7	fine cordmarked	Xindian	medium sand	orange
FCN4719	44	2017	Huizuiwa	Lintao	17LH-T01-L06	Layer 3	Ceramic sherd	ceramic	body	10	fine cordmarked	Xindian	medium sand	orange
FCN4719	54	2017	Huizuiwa	Lintao	17LH-T01-L06	Layer 3	Ceramic sherd	ceramic	body	8	fine cordmarked	Xindian	medium sand	orange
FCN4719	57	2017	Huizuiwa	Lintao	17LH-T01-L06	Layer 3	Ceramic sherd	ceramic	body	3.7	fine cordmarked	Xindian	medium sand	orange
FCN4719	59	2017	Huizuiwa	Lintao	17LH-T01-L06	Layer 3	Ceramic sherd	ceramic	body	6.8	fine cordmarked	Xindian	medium sand	orange
FCN4719	60	2017	Huizuiwa	Lintao	17LH-T01-L06	Layer 3	Ceramic sherd	ceramic	body	10.7	fine cordmarked	Xindian	medium sand	orange
FCN4719	74	2017	Huizuiwa	Lintao	17LH-T01-L06	Layer 3	Ceramic sherd	ceramic	body	3.6	fine cordmarked	Xindian	medium sand	orange
FCN4719	102	2017	Huizuiwa	Lintao	17LH-T01-L06	Layer 3	Ceramic sherd	ceramic	body	4.8	fine cordmarked	Xindian	medium sand	orange yellow
FCN4719	79	2017	Huizuiwa	Lintao	17LH-T01-L06	Layer 3	Ceramic sherd	ceramic	body	1.3	fine cordmarked	Xindian	fine	orange
FCN4719	81	2017	Huizuiwa	Lintao	17LH-T01-L06	Layer 3	Ceramic sherd	ceramic	body	3.5	fine cordmarked	Xindian	fine sand	brown
FCN4719	91	2017	Huizuiwa	Lintao	17LH-T01-L06	Layer 3	Ceramic sherd	ceramic	body	3.7	fine cordmarked	Xindian	fine sand	brown
FCN4719	62	2017	Huizuiwa	Lintao	17LH-T01-L06	Layer 3	Ceramic sherd	ceramic	body	4.4	fine cordmarked	Xindian	fine sand	grey
FCN4719	34	2017	Huizuiwa	Lintao	17LH-T01-L06	Layer 3	Ceramic sherd	ceramic	base	8	fine cordmarked	Xindian	fine sand	grey
FCN4719	36	2017	Huizuiwa	Lintao	17LH-T01-L06	Layer 3	Ceramic sherd	ceramic	body	18.8	fine cordmarked	Xindian	fine sand	orange
FCN4719	40	2017	Huizuiwa	Lintao	17LH-T01-L06	Layer 3	Ceramic sherd	ceramic	body	8.3	fine cordmarked	Xindian	fine sand	orange
FCN4719	42	2017	Huizuiwa	Lintao	17LH-T01-L06	Layer 3	Ceramic sherd	ceramic	body	6.7	fine cordmarked	Xindian	fine sand	orange
FCN4719	45	2017	Huizuiwa	Lintao	17LH-T01-L06	Layer 3	Ceramic sherd	ceramic	body	9.4	fine cordmarked	Xindian	fine sand	orange
FCN4719	48	2017	Huizuiwa	Lintao	17LH-T01-L06	Layer 3	Ceramic sherd	ceramic	body	16.9	fine cordmarked	Xindian	fine sand	orange
FCN4719	50	2017	Huizuiwa	Lintao	17LH-T01-L06	Layer 3	Ceramic sherd	ceramic	body	10.1	fine cordmarked	Xindian	fine sand	orange
FCN4719	52	2017	Huizuiwa	Lintao	17LH-T01-L06	Layer 3	Ceramic sherd	ceramic	body	12.8	fine cordmarked	Xindian	fine sand	orange
FCN4719	64	2017	Huizuiwa	Lintao	17LH-T01-L06	Layer 3	Ceramic sherd	ceramic	body	3.8	fine cordmarked	Xindian	fine sand	orange
FCN4719	69	2017	Huizuiwa	Lintao	17LH-T01-L06	Layer 3	Ceramic sherd	ceramic	body	4	fine cordmarked	Xindian	fine sand	orange
FCN4719	71	2017	Huizuiwa	Lintao	17LH-T01-L06	Layer 3	Ceramic sherd	ceramic	body	4	fine cordmarked	Xindian	fine sand	orange
FCN4719	84	2017	Huizuiwa	Lintao	17LH-T01-L06	Layer 3	Ceramic sherd	ceramic	body	5.3	fine cordmarked	Xindian	fine sand	orange
FCN4719	89	2017	Huizuiwa	Lintao	17LH-T01-L06	Layer 3	Ceramic sherd	ceramic	body	4.1	fine cordmarked	Xindian	fine sand	orange
FCN4719	90	2017	Huizuiwa	Lintao	17LH-T01-L06	Layer 3	Ceramic sherd	ceramic	body	5.3	fine cordmarked	Xindian	fine sand	orange
FCN4719	94	2017	Huizuiwa	Lintao	17LH-T01-L06	Layer 3	Ceramic sherd	ceramic	body	2.7	fine cordmarked	Xindian	fine sand	orange
FCN4719	96	2017	Huizuiwa	Lintao	17LH-T01-L06	Layer 3	Ceramic sherd	ceramic	body	1.3	fine cordmarked	Xindian	fine sand	orange
FCN4719	104	2017	Huizuiwa	Lintao	17LH-T01-L06	Layer 3	Ceramic sherd	ceramic	body	5.3	fine cordmarked	Xindian	fine sand	orange
FCN4719	112	2017	Huizuiwa	Lintao	17LH-T01-L06	Layer 3	Ceramic sherd	ceramic	body	1.2	fine cordmarked	Xindian	fine sand	orange
FCN4719	113	2017	Huizuiwa	Lintao	17LH-T01-L06	Layer 3	Ceramic sherd	ceramic	body	1.3	fine cordmarked	Xindian	fine sand	orange
FCN4719	70	2017	Huizuiwa	Lintao	17LH-T01-L06	Layer 3	Ceramic sherd	ceramic	body	5.4	fine cordmarked	Xindian	fine sand	orange yellow
FCN4719	103	2017	Huizuiwa	Lintao	17LH-T01-L06	Layer 3	Ceramic sherd	ceramic	body	4.5	fine cordmarked	Xindian	fine sand	orange yellow
FCN4719	108	2017	Huizuiwa	Lintao	17LH-T01-L06	Layer 3	Ceramic sherd	ceramic	body	2.7	fine cordmarked	Xindian	fine sand	orange yellow
FCN4719	67	2017	Huizuiwa	Lintao	17LH-T01-L06	Layer 3	Ceramic sherd	ceramic	body	5.9	fine cordmarked	Xindian	fine sand	yellow brown
FCN4719	93	2017	Huizuiwa	Lintao	17LH-T01-L06	Layer 3	Ceramic sherd	ceramic	body	5.5	fine cordmarked	Xindian	fine sand	yellow brown
FCN4719	5	2017	Huizuiwa	Lintao	17LH-T01-L06	Layer 3	Ceramic sherd	ceramic	body	5.6	fine cordmarked + appliqué	Xindian	fine sand	orange
FCN4719	51	2017	Huizuiwa	Lintao	17LH-T01-L06	Layer 3	Ceramic sherd	ceramic	body	5.4	plain	Xindian	medium sand	brown
FCN4719	80	2017	Huizuiwa	Lintao	17LH-T01-L06	Layer 3	Ceramic sherd	ceramic	body	3.1	plain	Xindian	medium sand	grey
FCN4719	35	2017	Huizuiwa	Lintao	17LH-T01-L06	Layer 3	Ceramic sherd	ceramic	body	13.7	plain	Xindian	medium sand	grey brown
FCN4719	53	2017	Huizuiwa	Lintao	17LH-T01-L06	Layer 3	Ceramic sherd	ceramic	body	2.5	plain	Xindian	medium sand	orange
FCN4719	65	2017	Huizuiwa	Lintao	17LH-T01-L06	Layer 3	Ceramic sherd	ceramic	body	6.2	plain	Xindian	medium sand	orange
FCN4719	92	2017	Huizuiwa	Lintao	17LH-T01-L06	Layer 3	Ceramic sherd	ceramic	body	7.8	plain	Xindian	medium sand	orange
FCN4719	58	2017	Huizuiwa	Lintao	17LH-T01-L06	Layer 3	Ceramic sherd	ceramic	body	7.6	plain	Xindian	medium sand	yellow brown
FCN4719	73	2017	Huizuiwa	Lintao	17LH-T01-L06	Layer 3	Ceramic sherd	ceramic	body	3.7	plain	Xindian	medium sand	yellow brown
FCN4719	7	2017	Huizuiwa	Lintao	17LH-T01-L06	Layer 3	Ceramic sherd	ceramic	handle	10	plain	Xindian	fine sand	brown
FCN4719	37	2017	Huizuiwa	Lintao	17LH-T01-L06	Layer 3	Ceramic sherd	ceramic	body	12.6	plain	Xindian	fine sand	grey
FCN4719	39	2017	Huizuiwa	Lintao	17LH-T01-L06	Layer 3	Ceramic sherd	ceramic	body	11.1	plain	Xindian	fine sand	orange
FCN4719	41	2017	Huizuiwa	Lintao	17LH-T01-L06	Layer 3	Ceramic sherd	ceramic	body	4.1	plain	Xindian	fine sand	orange
FCN4719	47	2017	Huizuiwa	Lintao	17LH-T01-L06	Layer 3	Ceramic sherd	ceramic	body	6.8	plain	Xindian	fine sand	orange
FCN4719	61	2017	Huizuiwa	Lintao	17LH-T01-L06	Layer 3	Ceramic sherd	ceramic	body	2.5	plain	Xindian	fine sand	orange
FCN4719	66	2017	Huizuiwa	Lintao	17LH-T01-L06	Layer 3	Ceramic sherd	ceramic	body	1.8	plain	Xindian	fine sand	orange
FCN4719	75	2017	Huizuiwa	Lintao	17LH-T01-L06	Layer 3	Ceramic sherd	ceramic	body	1.7	plain	Xindian	fine sand	orange
FCN4719	77	2017	Huizuiwa	Lintao	17LH-T01-L06	Layer 3	Ceramic sherd	ceramic	body	8.4	plain	Xindian	fine sand	orange
FCN4719	83	2017	Huizuiwa	Lintao	17LH-T01-L06	Layer 3	Ceramic sherd	ceramic	body	1.4	plain	Xindian	fine sand	orange
FCN4719	86	2017	Huizuiwa	Lintao	17LH-T01-L06	Layer 3	Ceramic sherd	ceramic	body	3.1	plain	Xindian	fine sand	orange
FCN4719	99	2017	Huizuiwa	Lintao	17LH-T01-L06	Layer 3	Ceramic sherd	ceramic	body	2.9	plain	Xindian	fine sand	orange
FCN4719	105	2017	Huizuiwa	Lintao	17LH-T01-L06	Layer 3	Ceramic sherd	ceramic	body	2	plain	Xindian	fine sand	orange
FCN4719	114	2017	Huizuiwa	Lintao	17LH-T01-L06	Layer 3	Ceramic sherd	ceramic	body	0.9	plain	Xindian	fine sand	orange
FCN4719	9	2017	Huizuiwa	Lintao	17LH-T01-L06	Layer 3	Ceramic sherd	ceramic	handle	14.6	plain	Xindian	fine sand	orange
FCN4719	88	2017	Huizuiwa	Lintao	17LH-T01-L06	Layer 3	Ceramic sherd	ceramic	body	0.9	plain	Xindian	fine sand	orange yellow
FCN4719	100	2017	Huizuiwa	Lintao	17LH-T01-L06	Layer 3	Ceramic sherd	ceramic	body	2.9	plain	Xindian	fine sand	orange yellow
FCN4719	106	2017	Huizuiwa	Lintao	17LH-T01-L06	Layer 3	Ceramic sherd	ceramic	body	1.2	plain	Xindian	fine sand	orange yellow
FCN4719	111	2017	Huizuiwa	Lintao	17LH-T01-L06	Layer 3	Ceramic sherd	ceramic	body	1.6	plain	Xindian	fine sand	orange yellow
FCN4719	55	2017	Huizuiwa	Lintao	17LH-T01-L06	Layer 3	Ceramic sherd	ceramic	body	5.9	plain	Xindian	fine sand	yellow brown
FCN4719	8	2017	Huizuiwa	Lintao	17LH-T01-L06	Layer 3	Ceramic sherd	ceramic	handle	1.3	slip	Xindian	fine	orange
FCN4719	95	2017	Huizuiwa	Lintao	17LH-T01-L06	Layer 3	Ceramic sherd	ceramic	body	2.3	slip	Xindian	fine sand	orange
FCN4719	85	2017	Huizuiwa	Lintao	17LH-T01-L06	Layer 3	Ceramic sherd	ceramic	body	1.7	slip	Xindian	fine sand	yellow brown
FCN4719	3	2017	Huizuiwa	Lintao	17LH-T01-L06	Layer 3	Ceramic sherd	ceramic	body	11.3	slip + appliqué	Xindian	medium sand	orange
FCN4719	117	2017	Huizuiwa	Lintao	17LH-T01-L06	Layer 3	Ceramic sherd	ceramic	body	0.7	slip + black pigment	Xindian	fine	orange yellow
FCN4719	11	2017	Huizuiwa	Lintao	17LH-T01-L06	Layer 3	Ceramic sherd	ceramic	body	7.1	slip + black pigment	Xindian	fine sand	grey
FCN4719	72	2017	Huizuiwa	Lintao	17LH-T01-L06	Layer 3	Ceramic sherd	ceramic	body	2.4	slip + black pigment	Xindian	fine sand	orange
FCN4719	14	2017	Huizuiwa	Lintao	17LH-T01-L06	Layer 3	Ceramic sherd	ceramic	body	4.6	slip + black pigment	Xindian	fine sand	orange yellow
FCN4719	82	2017	Huizuiwa	Lintao	17LH-T01-L06	Layer 3	Ceramic sherd	ceramic	body	1	slip + black pigment	Xindian	fine sand	yellow
FCN4719	101	2017	Huizuiwa	Lintao	17LH-T01-L06	Layer 3	Ceramic sherd	ceramic	body	10.5	slip + fine cordmarked	Xindian	medium sand	orange
FCN4701	8	2017	Huizuiwa	Lintao	17LH-T1-L02	H1	Ceramic sherd	ceramic	handle	30	appliqué	Xindian	medium sand	orange
FCN4701	1	2017	Huizuiwa	Lintao	17LH-T1-L02	H1	Ceramic sherd	ceramic	body	9.2	appliqué	Xindian	fine sand	orange
FCN4701	2	2017	Huizuiwa	Lintao	17LH-T1-L02	H1	Ceramic sherd	ceramic	body	6.6	appliqué	Xindian	fine sand	orange
FCN4701	10	2017	Huizuiwa	Lintao	17LH-T1-L02	H1	Ceramic sherd	ceramic	body	14.8	black pigment	Xindian	medium sand	brown
FCN4701	24	2017	Huizuiwa	Lintao	17LH-T1-L02	H1	Ceramic sherd	ceramic	body	2.6	black pigment	Xindian	medium sand	brown
FCN4701	17	2017	Huizuiwa	Lintao	17LH-T1-L02	H1	Ceramic sherd	ceramic	body	10.5	black pigment	Xindian	medium sand	grey
FCN4701	37	2017	Huizuiwa	Lintao	17LH-T1-L02	H1	Ceramic sherd	ceramic	body	10	black pigment	Xindian	medium sand	orange
FCN4701	43	2017	Huizuiwa	Lintao	17LH-T1-L02	H1	Ceramic sherd	ceramic	body	14.4	black pigment	Xindian	medium sand	orange
FCN4701	69	2017	Huizuiwa	Lintao	17LH-T1-L02	H1	Ceramic sherd	ceramic	body	9.3	black pigment	Xindian	medium sand	orange
FCN4701	73	2017	Huizuiwa	Lintao	17LH-T1-L02	H1	Ceramic sherd	ceramic	body	6.9	black pigment	Xindian	medium sand	orange
FCN4701	25	2017	Huizuiwa	Lintao	17LH-T1-L02	H1	Ceramic sherd	ceramic	body	1	black pigment	Xindian	fine	orange yellow
FCN4701	110	2017	Huizuiwa	Lintao	17LH-T1-L02	H1	Ceramic sherd	ceramic	body	1.2	black pigment	Xindian	fine	orange yellow
FCN4701	113	2017	Huizuiwa	Lintao	17LH-T1-L02	H1	Ceramic sherd	ceramic	body	1	black pigment	Xindian	fine	orange yellow
FCN4701	22	2017	Huizuiwa	Lintao	17LH-T1-L02	H1	Ceramic sherd	ceramic	body	3.8	black pigment	Xindian	fine sand	grey
FCN4701	30	2017	Huizuiwa	Lintao	17LH-T1-L02	H1	Ceramic sherd	ceramic	body	24	black pigment	Xindian	fine sand	grey brown
FCN4701	16	2017	Huizuiwa	Lintao	17LH-T1-L02	H1	Ceramic sherd	ceramic	body	16.4	black pigment	Xindian	fine sand	orange
FCN4701	18	2017	Huizuiwa	Lintao	17LH-T1-L02	H1	Ceramic sherd	ceramic	body	6.8	black pigment	Xindian	fine sand	orange
FCN4701	26	2017	Huizuiwa	Lintao	17LH-T1-L02	H1	Ceramic sherd	ceramic	body	1.2	black pigment	Xindian	fine sand	orange
FCN4701	29	2017	Huizuiwa	Lintao	17LH-T1-L02	H1	Ceramic sherd	ceramic	body	5.2	black pigment	Xindian	fine sand	orange
FCN4701	78	2017	Huizuiwa	Lintao	17LH-T1-L02	H1	Ceramic sherd	ceramic	body	1.7	black pigment	Xindian	fine sand	orange
FCN4701	82	2017	Huizuiwa	Lintao	17LH-T1-L02	H1	Ceramic sherd	ceramic	body	1	black pigment	Xindian	fine sand	orange
FCN4701	102	2017	Huizuiwa	Lintao	17LH-T1-L02	H1	Ceramic sherd	ceramic	body	1.5	black pigment	Xindian	fine sand	orange
FCN4701	27	2017	Huizuiwa	Lintao	17LH-T1-L02	H1	Ceramic sherd	ceramic	body	0.7	black pigment	Xindian	fine sand	orange yellow
FCN4701	6	2017	Huizuiwa	Lintao	17LH-T1-L02	H1	Ceramic sherd	ceramic	body	1.1	black pigment	Xindian	fine sand	orange yellow
FCN4701	38	2017	Huizuiwa	Lintao	17LH-T1-L02	H1	Ceramic sherd	ceramic	body	12.5	black pigment	Xindian	fine sand	yellow brown
FCN4701	13	2017	Huizuiwa	Lintao	17LH-T1-L02	H1	Ceramic sherd	ceramic	shoulder	136.2	black pigment + fine cordmarked	Xindian	fine sand	orange
FCN4701	23	2017	Huizuiwa	Lintao	17LH-T1-L02	H1	Ceramic sherd	ceramic	body	1.2	black pigment + red pigment	Xindian	fine sand	grey
FCN4701	41	2017	Huizuiwa	Lintao	17LH-T1-L02	H1	Ceramic sherd	ceramic	body	6.1	crossed cordmarked	Xindian	fine sand	orange
FCN4701	4	2017	Huizuiwa	Lintao	17LH-T1-L02	H1	Ceramic sherd	ceramic	body	4	appliqué	Xindian	fine sand	grey
FCN4701	33	2017	Huizuiwa	Lintao	17LH-T1-L02	H1	Ceramic sherd	ceramic	body	15.4	fine cordmarked	Xindian	coarse sand	orange yellow
FCN4701	44	2017	Huizuiwa	Lintao	17LH-T1-L02	H1	Ceramic sherd	ceramic	body	10.3	fine cordmarked	Xindian	medium sand	orange
FCN4701	45	2017	Huizuiwa	Lintao	17LH-T1-L02	H1	Ceramic sherd	ceramic	body	7.7	fine cordmarked	Xindian	medium sand	orange
FCN4701	55	2017	Huizuiwa	Lintao	17LH-T1-L02	H1	Ceramic sherd	ceramic	body	12.7	fine cordmarked	Xindian	medium sand	orange
FCN4701	93	2017	Huizuiwa	Lintao	17LH-T1-L02	H1	Ceramic sherd	ceramic	body	3.2	fine cordmarked	Xindian	medium sand	orange
FCN4701	64	2017	Huizuiwa	Lintao	17LH-T1-L02	H1	Ceramic sherd	ceramic	body	7.5	fine cordmarked	Xindian	medium sand	orange yellow
FCN4701	7	2017	Huizuiwa	Lintao	17LH-T1-L02	H1	Ceramic sherd	ceramic	neck	78.6	fine cordmarked	Xindian	medium sand	orange yellow
FCN4701	77	2017	Huizuiwa	Lintao	17LH-T1-L02	H1	Ceramic sherd	ceramic	body	2.9	fine cordmarked	Xindian	fine	grey
FCN4701	81	2017	Huizuiwa	Lintao	17LH-T1-L02	H1	Ceramic sherd	ceramic	body	1.3	fine cordmarked	Xindian	fine	orange
FCN4701	50	2017	Huizuiwa	Lintao	17LH-T1-L02	H1	Ceramic sherd	ceramic	body	6.7	fine cordmarked	Xindian	fine sand	light brown
FCN4701	46	2017	Huizuiwa	Lintao	17LH-T1-L02	H1	Ceramic sherd	ceramic	body	8.1	fine cordmarked	Xindian	fine sand	grey
FCN4701	72	2017	Huizuiwa	Lintao	17LH-T1-L02	H1	Ceramic sherd	ceramic	body	2.9	fine cordmarked	Xindian	fine sand	grey
FCN4701	99	2017	Huizuiwa	Lintao	17LH-T1-L02	H1	Ceramic sherd	ceramic	body	1.2	fine cordmarked	Xindian	fine sand	grey
FCN4701	117	2017	Huizuiwa	Lintao	17LH-T1-L02	H1	Ceramic sherd	ceramic	body	1.2	fine cordmarked	Xindian	fine sand	grey
FCN4701	11	2017	Huizuiwa	Lintao	17LH-T1-L02	H1	Ceramic sherd	ceramic	base	11.6	fine cordmarked	Xindian	fine sand	grey
FCN4701	74	2017	Huizuiwa	Lintao	17LH-T1-L02	H1	Ceramic sherd	ceramic	body	3.5	fine cordmarked	Xindian	fine sand	grey brown
FCN4701	48	2017	Huizuiwa	Lintao	17LH-T1-L02	H1	Ceramic sherd	ceramic	body	5	fine cordmarked	Xindian	fine sand	orange
FCN4701	52	2017	Huizuiwa	Lintao	17LH-T1-L02	H1	Ceramic sherd	ceramic	body	3.8	fine cordmarked	Xindian	fine sand	orange
FCN4701	61	2017	Huizuiwa	Lintao	17LH-T1-L02	H1	Ceramic sherd	ceramic	body	3.1	fine cordmarked	Xindian	fine sand	orange
FCN4701	63	2017	Huizuiwa	Lintao	17LH-T1-L02	H1	Ceramic sherd	ceramic	body	4.7	fine cordmarked	Xindian	fine sand	orange
FCN4701	79	2017	Huizuiwa	Lintao	17LH-T1-L02	H1	Ceramic sherd	ceramic	body	3.1	fine cordmarked	Xindian	fine sand	orange
FCN4701	84	2017	Huizuiwa	Lintao	17LH-T1-L02	H1	Ceramic sherd	ceramic	body	2.2	fine cordmarked	Xindian	fine sand	orange
FCN4701	86	2017	Huizuiwa	Lintao	17LH-T1-L02	H1	Ceramic sherd	ceramic	body	2.1	fine cordmarked	Xindian	fine sand	orange
FCN4701	105	2017	Huizuiwa	Lintao	17LH-T1-L02	H1	Ceramic sherd	ceramic	body	0.9	fine cordmarked	Xindian	fine sand	orange
FCN4701	112	2017	Huizuiwa	Lintao	17LH-T1-L02	H1	Ceramic sherd	ceramic	body	1.9	fine cordmarked	Xindian	fine sand	orange
FCN4701	115	2017	Huizuiwa	Lintao	17LH-T1-L02	H1	Ceramic sherd	ceramic	body	0.5	fine cordmarked	Xindian	fine sand	orange
FCN4701	36	2017	Huizuiwa	Lintao	17LH-T1-L02	H1	Ceramic sherd	ceramic	body	4.3	fine cordmarked	Xindian	fine sand	orange yellow
FCN4701	97	2017	Huizuiwa	Lintao	17LH-T1-L02	H1	Ceramic sherd	ceramic	body	2.3	fine cordmarked	Xindian	fine sand	orange yellow
FCN4701	67	2017	Huizuiwa	Lintao	17LH-T1-L02	H1	Ceramic sherd	ceramic	body	6.2	fine cordmarked + lines	Xindian	fine sand	orange
FCN4701	121	2017	Huizuiwa	Lintao	17LH-T1-L02	H1	Ceramic sherd	ceramic	body	2.6	plain	Xindian	medium sand	light brown
FCN4701	3	2017	Huizuiwa	Lintao	17LH-T1-L02	H1	Ceramic sherd	ceramic	body	20.5	plain	Xindian	medium sand	grey
FCN4701	70	2017	Huizuiwa	Lintao	17LH-T1-L02	H1	Ceramic sherd	ceramic	body	3.3	plain	Xindian	medium sand	grey brown
FCN4701	39	2017	Huizuiwa	Lintao	17LH-T1-L02	H1	Ceramic sherd	ceramic	body	9.4	plain	Xindian	medium sand	orange
FCN4701	53	2017	Huizuiwa	Lintao	17LH-T1-L02	H1	Ceramic sherd	ceramic	body	9.3	plain	Xindian	medium sand	orange
FCN4701	59	2017	Huizuiwa	Lintao	17LH-T1-L02	H1	Ceramic sherd	ceramic	body	7.8	plain	Xindian	medium sand	orange
FCN4701	71	2017	Huizuiwa	Lintao	17LH-T1-L02	H1	Ceramic sherd	ceramic	body	9.6	plain	Xindian	medium sand	orange
FCN4701	94	2017	Huizuiwa	Lintao	17LH-T1-L02	H1	Ceramic sherd	ceramic	body	3.6	plain	Xindian	medium sand	orange
FCN4701	100	2017	Huizuiwa	Lintao	17LH-T1-L02	H1	Ceramic sherd	ceramic	body	2.3	plain	Xindian	medium sand	orange
FCN4701	107	2017	Huizuiwa	Lintao	17LH-T1-L02	H1	Ceramic sherd	ceramic	body	1.9	plain	Xindian	medium sand	orange
FCN4701	9	2017	Huizuiwa	Lintao	17LH-T1-L02	H1	Ceramic sherd	ceramic	base	29.5	plain	Xindian	medium sand	orange
FCN4701	54	2017	Huizuiwa	Lintao	17LH-T1-L02	H1	Ceramic sherd	ceramic	body	3.8	plain	Xindian	medium sand	orange yellow
FCN4701	75	2017	Huizuiwa	Lintao	17LH-T1-L02	H1	Ceramic sherd	ceramic	body	5.3	plain	Xindian	medium sand	orange yellow
FCN4701	89	2017	Huizuiwa	Lintao	17LH-T1-L02	H1	Ceramic sherd	ceramic	body	5	plain	Xindian	medium sand	orange yellow
FCN4701	92	2017	Huizuiwa	Lintao	17LH-T1-L02	H1	Ceramic sherd	ceramic	body	3.7	plain	Xindian	medium sand	orange yellow
FCN4701	88	2017	Huizuiwa	Lintao	17LH-T1-L02	H1	Ceramic sherd	ceramic	body	1.4	plain	Xindian	fine	grey
FCN4701	109	2017	Huizuiwa	Lintao	17LH-T1-L02	H1	Ceramic sherd	ceramic	body	1	plain	Xindian	fine	grey
FCN4701	118	2017	Huizuiwa	Lintao	17LH-T1-L02	H1	Ceramic sherd	ceramic	body	1.1	plain	Xindian	fine	grey
FCN4701	119	2017	Huizuiwa	Lintao	17LH-T1-L02	H1	Ceramic sherd	ceramic	body	1.1	plain	Xindian	fine	grey
FCN4701	95	2017	Huizuiwa	Lintao	17LH-T1-L02	H1	Ceramic sherd	ceramic	body	2.3	plain	Xindian	fine	orange
FCN4701	122	2017	Huizuiwa	Lintao	17LH-T1-L02	H1	Ceramic sherd	ceramic	body	1.1	plain	Xindian	fine	orange
FCN4701	12	2017	Huizuiwa	Lintao	17LH-T1-L02	H1	Ceramic sherd	ceramic	base	4	plain	Xindian	fine	orange
FCN4701	68	2017	Huizuiwa	Lintao	17LH-T1-L02	H1	Ceramic sherd	ceramic	body	2.5	plain	Xindian	fine	orange yellow
FCN4701	96	2017	Huizuiwa	Lintao	17LH-T1-L02	H1	Ceramic sherd	ceramic	body	0.8	plain	Xindian	fine	orange yellow
FCN4701	60	2017	Huizuiwa	Lintao	17LH-T1-L02	H1	Ceramic sherd	ceramic	body	6.7	plain	Xindian	fine sand	grey
FCN4701	116	2017	Huizuiwa	Lintao	17LH-T1-L02	H1	Ceramic sherd	ceramic	body	0.9	plain	Xindian	fine sand	grey
FCN4701	120	2017	Huizuiwa	Lintao	17LH-T1-L02	H1	Ceramic sherd	ceramic	body	4.4	plain	Xindian	fine sand	grey
FCN4701	31	2017	Huizuiwa	Lintao	17LH-T1-L02	H1	Ceramic sherd	ceramic	body	18.2	plain	Xindian	fine sand	orange
FCN4701	51	2017	Huizuiwa	Lintao	17LH-T1-L02	H1	Ceramic sherd	ceramic	body	5.6	plain	Xindian	fine sand	orange
FCN4701	58	2017	Huizuiwa	Lintao	17LH-T1-L02	H1	Ceramic sherd	ceramic	body	9.7	plain	Xindian	fine sand	orange
FCN4701	65	2017	Huizuiwa	Lintao	17LH-T1-L02	H1	Ceramic sherd	ceramic	body	4.9	plain	Xindian	fine sand	orange
FCN4701	66	2017	Huizuiwa	Lintao	17LH-T1-L02	H1	Ceramic sherd	ceramic	body	4.2	plain	Xindian	fine sand	orange
FCN4701	76	2017	Huizuiwa	Lintao	17LH-T1-L02	H1	Ceramic sherd	ceramic	body	2.9	plain	Xindian	fine sand	orange
FCN4701	85	2017	Huizuiwa	Lintao	17LH-T1-L02	H1	Ceramic sherd	ceramic	body	4.5	plain	Xindian	fine sand	orange
FCN4701	87	2017	Huizuiwa	Lintao	17LH-T1-L02	H1	Ceramic sherd	ceramic	body	3.3	plain	Xindian	fine sand	orange
FCN4701	98	2017	Huizuiwa	Lintao	17LH-T1-L02	H1	Ceramic sherd	ceramic	body	1.7	plain	Xindian	fine sand	orange
FCN4701	103	2017	Huizuiwa	Lintao	17LH-T1-L02	H1	Ceramic sherd	ceramic	body	1.8	plain	Xindian	fine sand	orange
FCN4701	104	2017	Huizuiwa	Lintao	17LH-T1-L02	H1	Ceramic sherd	ceramic	body	0.8	plain	Xindian	fine sand	orange
FCN4701	111	2017	Huizuiwa	Lintao	17LH-T1-L02	H1	Ceramic sherd	ceramic	body	0.9	plain	Xindian	fine sand	orange
FCN4701	5	2017	Huizuiwa	Lintao	17LH-T1-L02	H1	Ceramic sherd	ceramic	body	20.8	plain	Xindian	fine sand	orange
FCN4701	56	2017	Huizuiwa	Lintao	17LH-T1-L02	H1	Ceramic sherd	ceramic	body	8.6	plain	Xindian	fine sand	orange yellow
FCN4701	83	2017	Huizuiwa	Lintao	17LH-T1-L02	H1	Ceramic sherd	ceramic	body	1.6	plain	Xindian	fine sand	orange yellow
FCN4701	90	2017	Huizuiwa	Lintao	17LH-T1-L02	H1	Ceramic sherd	ceramic	body	1.9	plain	Xindian	fine sand	orange yellow
FCN4701	91	2017	Huizuiwa	Lintao	17LH-T1-L02	H1	Ceramic sherd	ceramic	body	4	plain	Xindian	fine sand	orange yellow
FCN4701	106	2017	Huizuiwa	Lintao	17LH-T1-L02	H1	Ceramic sherd	ceramic	body	1	plain	Xindian	fine sand	orange yellow
FCN4701	114	2017	Huizuiwa	Lintao	17LH-T1-L02	H1	Ceramic sherd	ceramic	body	1.6	plain	Xindian	fine sand	orange yellow
FCN4701	32	2017	Huizuiwa	Lintao	17LH-T1-L02	H1	Ceramic sherd	ceramic	body	15	plain	Xindian	coarse sand	orange yellow
FCN4701	47	2017	Huizuiwa	Lintao	17LH-T1-L02	H1	Ceramic sherd	ceramic	body	9.6	plain	Xindian	coarse sand	orange yellow
FCN4701	80	2017	Huizuiwa	Lintao	17LH-T1-L02	H1	Ceramic sherd	ceramic	body	2.2	polish	Xindian	fine	orange
FCN4701	62	2017	Huizuiwa	Lintao	17LH-T1-L02	H1	Ceramic sherd	ceramic	body	1.9	polish	Xindian	fine sand	orange yellow
FCN4701	101	2017	Huizuiwa	Lintao	17LH-T1-L02	H1	Ceramic sherd	ceramic	body	1	red pigment	Xindian	fine	orange
FCN4701	28	2017	Huizuiwa	Lintao	17LH-T1-L02	H1	Ceramic sherd	ceramic	body	0.6	red pigment	Xindian	fine	orange yellow
FCN4701	57	2017	Huizuiwa	Lintao	17LH-T1-L02	H1	Ceramic sherd	ceramic	body	10.8	slip	Xindian	fine sand	orange yellow
FCN4701	49	2017	Huizuiwa	Lintao	17LH-T1-L02	H1	Ceramic sherd	ceramic	body	8.3	slip	Xindian	coarse sand	orange
FCN4701	34	2017	Huizuiwa	Lintao	17LH-T1-L02	H1	Ceramic sherd	ceramic	body	27.9	slip	Xindian	coarse sand	yellow brown
FCN4701	40	2017	Huizuiwa	Lintao	17LH-T1-L02	H1	Ceramic sherd	ceramic	body	9.6	slip + black pigment	Xindian	medium sand	brown
FCN4701	20	2017	Huizuiwa	Lintao	17LH-T1-L02	H1	Ceramic sherd	ceramic	body	8.6	slip + black pigment	Xindian	medium sand	orange yellow
FCN4701	42	2017	Huizuiwa	Lintao	17LH-T1-L02	H1	Ceramic sherd	ceramic	body	12.6	slip + black pigment	Xindian	medium sand	yellow brown
FCN4701	108	2017	Huizuiwa	Lintao	17LH-T1-L02	H1	Ceramic sherd	ceramic	body	0.9	slip + black pigment	Xindian	fine	orange
FCN4701	21	2017	Huizuiwa	Lintao	17LH-T1-L02	H1	Ceramic sherd	ceramic	body	4.7	slip + black pigment	Xindian	fine sand	orange
FCN4701	14	2017	Huizuiwa	Lintao	17LH-T1-L02	H1	Ceramic sherd	ceramic	body	39.7	slip + black pigment	Xindian	coarse sand	orange
FCN4701	19	2017	Huizuiwa	Lintao	17LH-T1-L02	H1	Ceramic sherd	ceramic	body	4.9	slip + black pigment + fine cordmarked	Xindian	fine sand	orange
FCN4701	35	2017	Huizuiwa	Lintao	17LH-T1-L02	H1	Ceramic sherd	ceramic	body	26.3	slip + fine cordmarked	Xindian	medium sand	yellow brown
FCN4701	15	2017	Huizuiwa	Lintao	17LH-T1-L02	H1	Ceramic sherd	ceramic	body	50.7	slip + red pigment	Xindian	medium sand	grey brown
FCN4705	10	2017	Huizuiwa	Lintao	17LH-T1-L03	H1	Ceramic sherd	ceramic	body	15	black pigment	Xindian	medium sand	orange
FCN4705	12	2017	Huizuiwa	Lintao	17LH-T1-L03	H1	Ceramic sherd	ceramic	body	19.2	black pigment	Xindian	medium sand	orange
FCN4705	13	2017	Huizuiwa	Lintao	17LH-T1-L03	H1	Ceramic sherd	ceramic	body	7.1	black pigment	Xindian	medium sand	orange
FCN4705	14	2017	Huizuiwa	Lintao	17LH-T1-L03	H1	Ceramic sherd	ceramic	body	7.9	black pigment	Xindian	medium sand	orange
FCN4705	17	2017	Huizuiwa	Lintao	17LH-T1-L03	H1	Ceramic sherd	ceramic	body	0.9	black pigment	Xindian	fine	orange yellow
FCN4705	15	2017	Huizuiwa	Lintao	17LH-T1-L03	H1	Ceramic sherd	ceramic	body	0.7	black pigment	Xindian	fine sand	brown
FCN4705	2	2017	Huizuiwa	Lintao	17LH-T1-L03	H1	Ceramic sherd	ceramic	body	7.8	black pigment + appliqué	Xindian	fine sand	orange
FCN4705	9	2017	Huizuiwa	Lintao	17LH-T1-L03	H1	Ceramic sherd	ceramic	body	11.7	black pigment + red pigment + fine cordmarked	Xindian	fine	yellow brown
FCN4705	5	2017	Huizuiwa	Lintao	17LH-T1-L03	H1	Ceramic sherd	ceramic	body	39.8	cordmarked	Xindian	medium sand	orange
FCN4705	50	2017	Huizuiwa	Lintao	17LH-T1-L03	H1	Ceramic sherd	ceramic	body	1.4	appliqué	Xindian	fine sand	brown
FCN4705	18	2017	Huizuiwa	Lintao	17LH-T1-L03	H1	Ceramic sherd	ceramic	body	12.2	fine cordmarked	Xindian	medium sand	orange
FCN4705	36	2017	Huizuiwa	Lintao	17LH-T1-L03	H1	Ceramic sherd	ceramic	body	10.5	fine cordmarked	Xindian	medium sand	orange
FCN4705	43	2017	Huizuiwa	Lintao	17LH-T1-L03	H1	Ceramic sherd	ceramic	body	4.3	fine cordmarked	Xindian	medium sand	orange yellow
FCN4705	46	2017	Huizuiwa	Lintao	17LH-T1-L03	H1	Ceramic sherd	ceramic	body	3	fine cordmarked	Xindian	fine	orange
FCN4705	23	2017	Huizuiwa	Lintao	17LH-T1-L03	H1	Ceramic sherd	ceramic	body	4.1	fine cordmarked	Xindian	fine sand	brown
FCN4705	25	2017	Huizuiwa	Lintao	17LH-T1-L03	H1	Ceramic sherd	ceramic	body	13.1	fine cordmarked	Xindian	fine sand	brown
FCN4705	26	2017	Huizuiwa	Lintao	17LH-T1-L03	H1	Ceramic sherd	ceramic	body	13.2	fine cordmarked	Xindian	fine sand	orange
FCN4705	28	2017	Huizuiwa	Lintao	17LH-T1-L03	H1	Ceramic sherd	ceramic	body	16.6	fine cordmarked	Xindian	fine sand	orange
FCN4705	40	2017	Huizuiwa	Lintao	17LH-T1-L03	H1	Ceramic sherd	ceramic	body	12.2	fine cordmarked	Xindian	coarse sand	grey
FCN4705	45	2017	Huizuiwa	Lintao	17LH-T1-L03	H1	Ceramic sherd	ceramic	body	8.4	fine cordmarked	Qijia	fine sand	grey
FCN4705	11	2017	Huizuiwa	Lintao	17LH-T1-L03	H1	Ceramic sherd	ceramic	body	25.8	line incisions	Xindian	coarse sand	brown
FCN4705	24	2017	Huizuiwa	Lintao	17LH-T1-L03	H1	Ceramic sherd	ceramic	body	19.9	plain	Xindian	medium sand	grey
FCN4705	47	2017	Huizuiwa	Lintao	17LH-T1-L03	H1	Ceramic sherd	ceramic	body	23.5	plain	Xindian	medium sand	grey brown
FCN4705	22	2017	Huizuiwa	Lintao	17LH-T1-L03	H1	Ceramic sherd	ceramic	body	14.2	plain	Xindian	medium sand	orange
FCN4705	31	2017	Huizuiwa	Lintao	17LH-T1-L03	H1	Ceramic sherd	ceramic	body	11.7	plain	Xindian	medium sand	orange
FCN4705	4	2017	Huizuiwa	Lintao	17LH-T1-L03	H1	Ceramic sherd	ceramic	body	1.9	plain	Xindian	medium sand	orange
FCN4705	8	2017	Huizuiwa	Lintao	17LH-T1-L03	H1	Ceramic sherd	ceramic	handle	9.5	plain	Xindian	medium sand	orange
FCN4705	32	2017	Huizuiwa	Lintao	17LH-T1-L03	H1	Ceramic sherd	ceramic	body	5.4	plain	Xindian	medium sand	orange yellow
FCN4705	44	2017	Huizuiwa	Lintao	17LH-T1-L03	H1	Ceramic sherd	ceramic	body	4.5	plain	Xindian	medium sand	yellow brown
FCN4705	3	2017	Huizuiwa	Lintao	17LH-T1-L03	H1	Ceramic sherd	ceramic	body	1.5	plain	Xindian	fine	light brown
FCN4705	48	2017	Huizuiwa	Lintao	17LH-T1-L03	H1	Ceramic sherd	ceramic	body	1.1	plain	Xindian	fine	orange yellow
FCN4705	49	2017	Huizuiwa	Lintao	17LH-T1-L03	H1	Ceramic sherd	ceramic	body	0.9	plain	Xindian	fine	orange yellow
FCN4705	6	2017	Huizuiwa	Lintao	17LH-T1-L03	H1	Ceramic sherd	ceramic	base	4.4	plain	Xindian	fine sand	light brown
FCN4705	27	2017	Huizuiwa	Lintao	17LH-T1-L03	H1	Ceramic sherd	ceramic	body	6.8	plain	Xindian	fine sand	grey
FCN4705	30	2017	Huizuiwa	Lintao	17LH-T1-L03	H1	Ceramic sherd	ceramic	body	25.2	plain	Xindian	fine sand	grey
FCN4705	1	2017	Huizuiwa	Lintao	17LH-T1-L03	H1	Ceramic sherd	ceramic	body	10.4	plain	Xindian	fine sand	grey
FCN4705	37	2017	Huizuiwa	Lintao	17LH-T1-L03	H1	Ceramic sherd	ceramic	body	4.1	plain	Xindian	fine sand	grey brown
FCN4705	29	2017	Huizuiwa	Lintao	17LH-T1-L03	H1	Ceramic sherd	ceramic	body	12.6	plain	Xindian	fine sand	orange
FCN4705	33	2017	Huizuiwa	Lintao	17LH-T1-L03	H1	Ceramic sherd	ceramic	body	3.6	plain	Xindian	fine sand	orange
FCN4705	41	2017	Huizuiwa	Lintao	17LH-T1-L03	H1	Ceramic sherd	ceramic	body	9.6	plain	Xindian	fine sand	orange
FCN4705	42	2017	Huizuiwa	Lintao	17LH-T1-L03	H1	Ceramic sherd	ceramic	body	7.4	plain	Xindian	fine sand	orange
FCN4705	35	2017	Huizuiwa	Lintao	17LH-T1-L03	H1	Ceramic sherd	ceramic	body	14.8	plain	Xindian	coarse sand	orange
FCN4705	38	2017	Huizuiwa	Lintao	17LH-T1-L03	H1	Ceramic sherd	ceramic	body	10.7	plain	Xindian	coarse sand	orange
FCN4705	39	2017	Huizuiwa	Lintao	17LH-T1-L03	H1	Ceramic sherd	ceramic	body	6.5	plain	Xindian	coarse sand	orange
FCN4705	21	2017	Huizuiwa	Lintao	17LH-T1-L03	H1	Ceramic sherd	ceramic	body	11.4	plain	Majiayao	fine	grey
FCN4705	19	2017	Huizuiwa	Lintao	17LH-T1-L03	H1	Ceramic sherd	ceramic	body	8.4	slip	Xindian	medium sand	orange
FCN4705	34	2017	Huizuiwa	Lintao	17LH-T1-L03	H1	Ceramic sherd	ceramic	body	2.5	slip	Xindian	fine sand	grey brown
FCN4705	20	2017	Huizuiwa	Lintao	17LH-T1-L03	H1	Ceramic sherd	ceramic	body	34.9	slip	Xindian	coarse sand	orange
FCN4705	7	2017	Huizuiwa	Lintao	17LH-T1-L03	H1	Ceramic sherd	ceramic	handle	10.3	slip + black pigment	Xindian	medium sand	grey
FCN4705	16	2017	Huizuiwa	Lintao	17LH-T1-L03	H1	Ceramic sherd	ceramic	body	2.5	slip + black pigment	Xindian	fine sand	orange
FCN4710	12	2017	Huizuiwa	Lintao	17LH-T1-L04	H2	Ceramic sherd	ceramic	body	15.7	black pigment	Xindian	medium sand	orange
FCN4710	7	2017	Huizuiwa	Lintao	17LH-T1-L04	H2	Ceramic sherd	ceramic	body	0.7	black pigment	Xindian	fine	orange yellow
FCN4710	8	2017	Huizuiwa	Lintao	17LH-T1-L04	H2	Ceramic sherd	ceramic	body	2.2	black pigment	Xindian	fine sand	orange
FCN4710	18	2017	Huizuiwa	Lintao	17LH-T1-L04	H2	Ceramic sherd	ceramic	body	5.4	black pigment	Xindian	fine sand	orange
FCN4710	4	2017	Huizuiwa	Lintao	17LH-T1-L04	H2	Ceramic sherd	ceramic	body	10.4	black pigment	Xindian	coarse sand	orange
FCN4710	5	2017	Huizuiwa	Lintao	17LH-T1-L04	H2	Ceramic sherd	ceramic	base	3	black pigment + fine cordmarked	Xindian	fine sand	orange yellow
FCN4710	14	2017	Huizuiwa	Lintao	17LH-T1-L04	H2	Ceramic sherd	ceramic	body	20.1	fine cordmarked	Xindian	medium sand	orange
FCN4710	10	2017	Huizuiwa	Lintao	17LH-T1-L04	H2	Ceramic sherd	ceramic	body	4.2	fine cordmarked	Xindian	fine sand	orange
FCN4710	17	2017	Huizuiwa	Lintao	17LH-T1-L04	H2	Ceramic sherd	ceramic	body	4.8	fine cordmarked	Xindian	fine sand	orange
FCN4710	22	2017	Huizuiwa	Lintao	17LH-T1-L04	H2	Ceramic sherd	ceramic	body	3	fine cordmarked	Xindian	fine sand	orange
FCN4710	2	2017	Huizuiwa	Lintao	17LH-T1-L04	H2	Ceramic sherd	ceramic	body	31.3	fine cordmarked + appliqué	Xindian	medium sand	orange
FCN4710	13	2017	Huizuiwa	Lintao	17LH-T1-L04	H2	Ceramic sherd	ceramic	body	27.6	fine cordmarked + appliqué	Xindian	coarse sand	orange
FCN4710	24	2017	Huizuiwa	Lintao	17LH-T1-L04	H2	Ceramic sherd	ceramic	body	1.2	plain	Xindian	medium sand	brown
FCN4710	23	2017	Huizuiwa	Lintao	17LH-T1-L04	H2	Ceramic sherd	ceramic	body	2.4	plain	Xindian	fine	orange
FCN4710	25	2017	Huizuiwa	Lintao	17LH-T1-L04	H2	Ceramic sherd	ceramic	body	0.3	plain	Xindian	fine	orange yellow
FCN4710	19	2017	Huizuiwa	Lintao	17LH-T1-L04	H2	Ceramic sherd	ceramic	body	5.4	plain	Xindian	fine sand	grey
FCN4710	20	2017	Huizuiwa	Lintao	17LH-T1-L04	H2	Ceramic sherd	ceramic	body	3.4	plain	Xindian	fine sand	grey brown
FCN4710	6	2017	Huizuiwa	Lintao	17LH-T1-L04	H2	Ceramic sherd	ceramic	body	2.5	plain	Xindian	fine sand	orange
FCN4710	16	2017	Huizuiwa	Lintao	17LH-T1-L04	H2	Ceramic sherd	ceramic	base	9.1	plain	Xindian	fine sand	orange
FCN4710	15	2017	Huizuiwa	Lintao	17LH-T1-L04	H2	Ceramic sherd	ceramic	body	10.7	slip	Xindian	fine sand	orange
FCN4710	1	2017	Huizuiwa	Lintao	17LH-T1-L04	H2	Ceramic sherd	ceramic	body	34.2	slip + appliqué	Xindian	medium sand	brown
FCN4710	9	2017	Huizuiwa	Lintao	17LH-T1-L04	H2	Ceramic sherd	ceramic	body	1.3	slip + black pigment	Xindian	fine sand	orange
FCN4710	21	2017	Huizuiwa	Lintao	17LH-T1-L04	H2	Ceramic sherd	ceramic	body	4.5	slip + black pigment	Xindian	fine sand	orange
FCN4710	11	2017	Huizuiwa	Lintao	17LH-T1-L04	H2	Ceramic sherd	ceramic	body	79.2	slip + black pigment	Xindian	coarse sand	orange
FCN4710	3	2017	Huizuiwa	Lintao	17LH-T1-L04	H2	Ceramic sherd	ceramic	handle	58.3	slip + black pigment + fine cordmarked	Xindian	medium sand	orange
FCN4715	21	2017	Huizuiwa	Lintao	17LH-T1-L05	Layer 2	Ceramic sherd	ceramic	body	2.2	basket impressions	Qijia	fine	orange
FCN4715	6	2017	Huizuiwa	Lintao	17LH-T1-L05	Layer 2	Ceramic sherd	ceramic	body	0.5	black pigment	Xindian	fine	orange yellow
FCN4715	2	2017	Huizuiwa	Lintao	17LH-T1-L05	Layer 2	Ceramic sherd	ceramic	body	2.7	black pigment	Xindian	fine sand	orange
FCN4715	7	2017	Huizuiwa	Lintao	17LH-T1-L05	Layer 2	Ceramic sherd	ceramic	body	1.7	black pigment	Xindian	fine sand	orange yellow
FCN4715	1	2017	Huizuiwa	Lintao	17LH-T1-L05	Layer 2	Ceramic sherd	ceramic	body	17.5	black pigment + red pigment + incisions	Xindian	fine sand	orange
FCN4715	13	2017	Huizuiwa	Lintao	17LH-T1-L05	Layer 2	Ceramic sherd	ceramic	body	2.9	fine cordmarked	Xindian	fine sand	orange
FCN4715	19	2017	Huizuiwa	Lintao	17LH-T1-L05	Layer 2	Ceramic sherd	ceramic	body	3.7	fine cordmarked	Xindian	fine sand	orange yellow
FCN4715	20	2017	Huizuiwa	Lintao	17LH-T1-L05	Layer 2	Ceramic sherd	ceramic	body	3.9	fine cordmarked	Xindian	fine sand	orange yellow
FCN4715	22	2017	Huizuiwa	Lintao	17LH-T1-L05	Layer 2	Ceramic sherd	ceramic	body	3.5	line incisions	Xindian	fine sand	orange
FCN4715	17	2017	Huizuiwa	Lintao	17LH-T1-L05	Layer 2	Ceramic sherd	ceramic	body	4.1	plain	Xindian	medium sand	brown
FCN4715	11	2017	Huizuiwa	Lintao	17LH-T1-L05	Layer 2	Ceramic sherd	ceramic	base	12.8	plain	Xindian	medium sand	orange
FCN4715	18	2017	Huizuiwa	Lintao	17LH-T1-L05	Layer 2	Ceramic sherd	ceramic	body	0.7	plain	Xindian	fine	orange yellow
FCN4715	12	2017	Huizuiwa	Lintao	17LH-T1-L05	Layer 2	Ceramic sherd	ceramic	body	4.5	plain	Xindian	fine sand	orange
FCN4715	25	2017	Huizuiwa	Lintao	17LH-T1-L05	Layer 2	Ceramic sherd	ceramic	body	2.5	plain	Xindian	fine sand	orange
FCN4715	8	2017	Huizuiwa	Lintao	17LH-T1-L05	Layer 2	Ceramic sherd	ceramic	handle	11.2	plain	Xindian	fine sand	orange
FCN4715	15	2017	Huizuiwa	Lintao	17LH-T1-L05	Layer 2	Ceramic sherd	ceramic	body	2.2	plain	Xindian	fine sand	orange yellow
FCN4715	10	2017	Huizuiwa	Lintao	17LH-T1-L05	Layer 2	Ceramic sherd	ceramic	body	1.8	plain	Xindian	fine sand	orange yellow
FCN4715	24	2017	Huizuiwa	Lintao	17LH-T1-L05	Layer 2	Ceramic sherd	ceramic	body	3.7	plain	Xindian	fine sand	yellow brown
FCN4715	9	2017	Huizuiwa	Lintao	17LH-T1-L05	Layer 2	Ceramic sherd	ceramic	handle	10.5	plain	Xindian	coarse sand	orange
FCN4715	3	2017	Huizuiwa	Lintao	17LH-T1-L05	Layer 2	Ceramic sherd	ceramic	body	3.7	red pigment	Xindian	fine sand	orange
FCN4715	4	2017	Huizuiwa	Lintao	17LH-T1-L05	Layer 2	Ceramic sherd	ceramic	body	3.3	red pigment	Xindian	fine sand	orange
FCN4715	5	2017	Huizuiwa	Lintao	17LH-T1-L05	Layer 2	Ceramic sherd	ceramic	body	2.2	slip	Xindian	fine	grey
FCN4715	16	2017	Huizuiwa	Lintao	17LH-T1-L05	Layer 2	Ceramic sherd	ceramic	body	2.3	slip	Xindian	fine sand	orange yellow
FCN4715	23	2017	Huizuiwa	Lintao	17LH-T1-L05	Layer 2	Ceramic sherd	ceramic	body	3.2	slip	Xindian	fine sand	yellow brown
FCN4715	14	2017	Huizuiwa	Lintao	17LH-T1-L05	Layer 2	Ceramic sherd	ceramic	body	0.6	slip + black pigment	Xindian	fine	orange yellow
FCN4725	8	2017	Huizuiwa	Lintao	17LH-T1-L07	Layer 3	Ceramic sherd	ceramic	body	0.5	black pigment	Xindian	fine	orange
FCN4725	7	2017	Huizuiwa	Lintao	17LH-T1-L07	Layer 3	Ceramic sherd	ceramic	body	1.5	black pigment	Xindian	fine	orange (grey core)
FCN4725	4	2017	Huizuiwa	Lintao	17LH-T1-L07	Layer 3	Ceramic sherd	ceramic	body	1.5	slip + fine cordmarked	Xindian	medium sand	light brown (orange)
FCN4725	1	2017	Huizuiwa	Lintao	17LH-T1-L07	Layer 3	Ceramic sherd	ceramic	body	15.4	slip + fine cordmarked	Xindian	coarse sand	grey brown
FCN4725	5	2017	Huizuiwa	Lintao	17LH-T1-L07	Layer 3	Ceramic sherd	ceramic	body	2.4	plain	Xindian	medium sand	orange yellow (grey)
FCN4725	3	2017	Huizuiwa	Lintao	17LH-T1-L07	Layer 3	Ceramic sherd	ceramic	body	3.3	plain	Xindian	fine	orange
FCN4725	2	2017	Huizuiwa	Lintao	17LH-T1-L07	Layer 3	Ceramic sherd	ceramic	body	5.3	plain	Xindian	fine sand	grey (orange core)
FCN4725	6	2017	Huizuiwa	Lintao	17LH-T1-L07	Layer 3	Ceramic sherd	ceramic	body	1.3	slip + black pigment	Xindian	medium sand	orange yellow (grey)
FCN4729	69	2017	Huizuiwa	Lintao	17LH-T1-L08	Layer 3	Ceramic sherd	ceramic	body	4.4	appliqué	Xindian	fine	grey
FCN4729	3	2017	Huizuiwa	Lintao	17LH-T1-L08	Layer 3	Ceramic sherd	ceramic	body	10.8	appliqué	Xindian	fine sand	light brown (grey core)
FCN4729	55	2017	Huizuiwa	Lintao	17LH-T1-L08	Layer 3	Ceramic sherd	ceramic	body	4.2	black pigment	Xindian	medium sand	grey
FCN4729	48	2017	Huizuiwa	Lintao	17LH-T1-L08	Layer 3	Ceramic sherd	ceramic	body	9.1	black pigment	Xindian	medium sand	grey brown
FCN4729	22	2017	Huizuiwa	Lintao	17LH-T1-L08	Layer 3	Ceramic sherd	ceramic	handle	17.4	black pigment	Xindian	medium sand	orange
FCN4729	97	2017	Huizuiwa	Lintao	17LH-T1-L08	Layer 3	Ceramic sherd	ceramic	body	4	black pigment	Xindian	medium sand	red brown (grey)
FCN4729	142	2017	Huizuiwa	Lintao	17LH-T1-L08	Layer 3	Ceramic sherd	ceramic	body	4.6	black pigment	Xindian	medium sand	red brown (grey)
FCN4729	112	2017	Huizuiwa	Lintao	17LH-T1-L08	Layer 3	Ceramic sherd	ceramic	body	1.6	black pigment	Xindian	fine	light brown
FCN4729	18	2017	Huizuiwa	Lintao	17LH-T1-L08	Layer 3	Ceramic sherd	ceramic	body	3.1	black pigment	Xindian	fine	grey
FCN4729	175	2017	Huizuiwa	Lintao	17LH-T1-L08	Layer 3	Ceramic sherd	ceramic	body	1.6	black pigment	Xindian	fine	grey brown
FCN4729	161	2017	Huizuiwa	Lintao	17LH-T1-L08	Layer 3	Ceramic sherd	ceramic	body	1.9	black pigment	Xindian	fine	orange (grey core)
FCN4729	185	2017	Huizuiwa	Lintao	17LH-T1-L08	Layer 3	Ceramic sherd	ceramic	body	1.9	black pigment	Xindian	fine	orange yellow
FCN4729	9	2017	Huizuiwa	Lintao	17LH-T1-L08	Layer 3	Ceramic sherd	ceramic	body	5.8	black pigment	Xindian	fine	orange yellow (grey)
FCN4729	17	2017	Huizuiwa	Lintao	17LH-T1-L08	Layer 3	Ceramic sherd	ceramic	body	2.4	black pigment	Xindian	fine	yellow brown
FCN4729	37	2017	Huizuiwa	Lintao	17LH-T1-L08	Layer 3	Ceramic sherd	ceramic	body	9	black pigment	Xindian	fine sand	light brown (grey core)
FCN4729	116	2017	Huizuiwa	Lintao	17LH-T1-L08	Layer 3	Ceramic sherd	ceramic	body	2.2	black pigment	Xindian	fine sand	grey (red core)
FCN4729	29	2017	Huizuiwa	Lintao	17LH-T1-L08	Layer 3	Ceramic sherd	ceramic	body	8	black pigment	Xindian	fine sand	grey
FCN4729	34	2017	Huizuiwa	Lintao	17LH-T1-L08	Layer 3	Ceramic sherd	ceramic	body	1.9	black pigment	Xindian	fine sand	grey
FCN4729	38	2017	Huizuiwa	Lintao	17LH-T1-L08	Layer 3	Ceramic sherd	ceramic	body	6.5	black pigment	Xindian	fine sand	grey
FCN4729	159	2017	Huizuiwa	Lintao	17LH-T1-L08	Layer 3	Ceramic sherd	ceramic	body	2.4	black pigment	Xindian	fine sand	grey
FCN4729	122	2017	Huizuiwa	Lintao	17LH-T1-L08	Layer 3	Ceramic sherd	ceramic	body	4.9	black pigment	Xindian	fine sand	grey (orange core)
FCN4729	68	2017	Huizuiwa	Lintao	17LH-T1-L08	Layer 3	Ceramic sherd	ceramic	body	12.1	black pigment	Xindian	fine sand	grey brown
FCN4729	72	2017	Huizuiwa	Lintao	17LH-T1-L08	Layer 3	Ceramic sherd	ceramic	body	6.1	black pigment	Xindian	fine sand	orange
FCN4729	13	2017	Huizuiwa	Lintao	17LH-T1-L08	Layer 3	Ceramic sherd	ceramic	body	3.3	black pigment	Xindian	fine sand	orange
FCN4729	118	2017	Huizuiwa	Lintao	17LH-T1-L08	Layer 3	Ceramic sherd	ceramic	body	4	black pigment	Xindian	fine sand	orange (grey core)
FCN4729	184	2017	Huizuiwa	Lintao	17LH-T1-L08	Layer 3	Ceramic sherd	ceramic	body	1.7	black pigment	Xindian	fine sand	orange yellow
FCN4729	15	2017	Huizuiwa	Lintao	17LH-T1-L08	Layer 3	Ceramic sherd	ceramic	body	2.6	black pigment	Xindian	fine sand	orange yellow (grey)
FCN4729	16	2017	Huizuiwa	Lintao	17LH-T1-L08	Layer 3	Ceramic sherd	ceramic	body	2.2	black pigment	Xindian	fine sand	orange yellow (grey)
FCN4729	31	2017	Huizuiwa	Lintao	17LH-T1-L08	Layer 3	Ceramic sherd	ceramic	body	5.4	black pigment	Xindian	fine sand	red
FCN4729	169	2017	Huizuiwa	Lintao	17LH-T1-L08	Layer 3	Ceramic sherd	ceramic	body	2.6	black pigment	Xindian	fine sand	red
FCN4729	64	2017	Huizuiwa	Lintao	17LH-T1-L08	Layer 3	Ceramic sherd	ceramic	body	8.2	black pigment	Xindian	fine sand	red brown
FCN4729	132	2017	Huizuiwa	Lintao	17LH-T1-L08	Layer 3	Ceramic sherd	ceramic	body	2.3	black pigment	Xindian	fine sand	yellow brown
FCN4729	53	2017	Huizuiwa	Lintao	17LH-T1-L08	Layer 3	Ceramic sherd	ceramic	body	14.7	black pigment	Xindian	coarse sand	orange
FCN4729	61	2017	Huizuiwa	Lintao	17LH-T1-L08	Layer 3	Ceramic sherd	ceramic	body	12.3	black pigment	Xindian	coarse sand	orange
FCN4729	71	2017	Huizuiwa	Lintao	17LH-T1-L08	Layer 3	Ceramic sherd	ceramic	body	8	black pigment	Xindian	coarse sand	orange
FCN4729	101	2017	Huizuiwa	Lintao	17LH-T1-L08	Layer 3	Ceramic sherd	ceramic	body	9	black pigment	Xindian	coarse sand	orange
FCN4729	133	2017	Huizuiwa	Lintao	17LH-T1-L08	Layer 3	Ceramic sherd	ceramic	body	9	black pigment	Xindian	coarse sand	orange (grey core)
FCN4729	140	2017	Huizuiwa	Lintao	17LH-T1-L08	Layer 3	Ceramic sherd	ceramic	body	2.9	black pigment	Xindian	coarse sand	red
FCN4729	65	2017	Huizuiwa	Lintao	17LH-T1-L08	Layer 3	Ceramic sherd	ceramic	body	4.2	black pigment + fine cordmarked	Xindian	medium sand	red
FCN4729	23	2017	Huizuiwa	Lintao	17LH-T1-L08	Layer 3	Ceramic sherd	ceramic	body	9.4	black pigment + polish	Xindian	fine	yellow brown
FCN4729	11	2017	Huizuiwa	Lintao	17LH-T1-L08	Layer 3	Ceramic sherd	ceramic	body	6.6	black pigment + red pigment	Xindian	fine sand	grey brown
FCN4729	86	2017	Huizuiwa	Lintao	17LH-T1-L08	Layer 3	Ceramic sherd	ceramic	body	2.6	black pigment + red pigment + white pigment	Xindian	fine	red brown
FCN4729	30	2017	Huizuiwa	Lintao	17LH-T1-L08	Layer 3	Ceramic sherd	ceramic	body	11.7	black pigment + white pigment	Xindian	medium sand	brown
FCN4729	40	2017	Huizuiwa	Lintao	17LH-T1-L08	Layer 3	Ceramic sherd	ceramic	body	3	black pigment + white pigment	Xindian	medium sand	orange
FCN4729	10	2017	Huizuiwa	Lintao	17LH-T1-L08	Layer 3	Ceramic sherd	ceramic	body	6.1	black pigment + white pigment	Xindian	medium sand	orange (brown)
FCN4729	104	2017	Huizuiwa	Lintao	17LH-T1-L08	Layer 3	Ceramic sherd	ceramic	body	4.4	black pigment + white pigment	Xindian	medium sand	orange (grey core)
FCN4729	177	2017	Huizuiwa	Lintao	17LH-T1-L08	Layer 3	Ceramic sherd	ceramic	body	1.5	black pigment + white pigment	Xindian	fine	light brown (orange)
FCN4729	146	2017	Huizuiwa	Lintao	17LH-T1-L08	Layer 3	Ceramic sherd	ceramic	body	2.5	black pigment + white pigment	Xindian	fine	orange (grey core)
FCN4729	167	2017	Huizuiwa	Lintao	17LH-T1-L08	Layer 3	Ceramic sherd	ceramic	body	1.7	black pigment + white pigment	Xindian	fine	red brown
FCN4729	54	2017	Huizuiwa	Lintao	17LH-T1-L08	Layer 3	Ceramic sherd	ceramic	body	4.7	black pigment + white pigment	Xindian	fine sand	grey
FCN4729	126	2017	Huizuiwa	Lintao	17LH-T1-L08	Layer 3	Ceramic sherd	ceramic	body	1.2	black pigment + white pigment	Xindian	fine sand	grey (red core)
FCN4729	12	2017	Huizuiwa	Lintao	17LH-T1-L08	Layer 3	Ceramic sherd	ceramic	body	4.5	black pigment + white pigment	Xindian	fine sand	orange
FCN4729	35	2017	Huizuiwa	Lintao	17LH-T1-L08	Layer 3	Ceramic sherd	ceramic	body	1.5	black pigment + white pigment	Xindian	fine sand	orange yellow
FCN4729	41	2017	Huizuiwa	Lintao	17LH-T1-L08	Layer 3	Ceramic sherd	ceramic	body	0.6	black pigment + white pigment	Xindian	fine sand	orange yellow (grey)
FCN4729	42	2017	Huizuiwa	Lintao	17LH-T1-L08	Layer 3	Ceramic sherd	ceramic	body	5	black pigment + white pigment	Xindian	fine sand	orange yellow (grey)
FCN4729	33	2017	Huizuiwa	Lintao	17LH-T1-L08	Layer 3	Ceramic sherd	ceramic	body	11.9	black pigment + white pigment	Xindian	fine sand	yellow brown
FCN4729	32	2017	Huizuiwa	Lintao	17LH-T1-L08	Layer 3	Ceramic sherd	ceramic	body	23.7	black pigment + white pigment	Xindian	coarse sand	grey (red core)
FCN4729	98	2017	Huizuiwa	Lintao	17LH-T1-L08	Layer 3	Ceramic sherd	ceramic	body	2.7	fine cordmarked	Xindian	medium sand	light brown
FCN4729	135	2017	Huizuiwa	Lintao	17LH-T1-L08	Layer 3	Ceramic sherd	ceramic	body	3.3	fine cordmarked	Xindian	medium sand	light brown (orange)
FCN4729	149	2017	Huizuiwa	Lintao	17LH-T1-L08	Layer 3	Ceramic sherd	ceramic	body	4.4	fine cordmarked	Xindian	medium sand	grey
FCN4729	134	2017	Huizuiwa	Lintao	17LH-T1-L08	Layer 3	Ceramic sherd	ceramic	body	4	fine cordmarked	Xindian	medium sand	grey (brown core)
FCN4729	164	2017	Huizuiwa	Lintao	17LH-T1-L08	Layer 3	Ceramic sherd	ceramic	body	1.5	fine cordmarked	Xindian	medium sand	grey (brown core)
FCN4729	156	2017	Huizuiwa	Lintao	17LH-T1-L08	Layer 3	Ceramic sherd	ceramic	body	2.1	fine cordmarked	Xindian	medium sand	grey (orange core)
FCN4729	39	2017	Huizuiwa	Lintao	17LH-T1-L08	Layer 3	Ceramic sherd	ceramic	body	17.2	fine cordmarked	Xindian	medium sand	grey (red core)
FCN4729	82	2017	Huizuiwa	Lintao	17LH-T1-L08	Layer 3	Ceramic sherd	ceramic	body	8.5	fine cordmarked	Xindian	medium sand	grey brown
FCN4729	141	2017	Huizuiwa	Lintao	17LH-T1-L08	Layer 3	Ceramic sherd	ceramic	body	8.6	fine cordmarked	Xindian	medium sand	grey brown
FCN4729	57	2017	Huizuiwa	Lintao	17LH-T1-L08	Layer 3	Ceramic sherd	ceramic	body	12.2	fine cordmarked	Xindian	medium sand	grey brown (orange)
FCN4729	63	2017	Huizuiwa	Lintao	17LH-T1-L08	Layer 3	Ceramic sherd	ceramic	body	16.4	fine cordmarked	Xindian	medium sand	grey brown (red)
FCN4729	67	2017	Huizuiwa	Lintao	17LH-T1-L08	Layer 3	Ceramic sherd	ceramic	body	6.9	fine cordmarked	Xindian	medium sand	red brown
FCN4729	145	2017	Huizuiwa	Lintao	17LH-T1-L08	Layer 3	Ceramic sherd	ceramic	body	3.1	fine cordmarked	Xindian	fine	grey
FCN4729	107	2017	Huizuiwa	Lintao	17LH-T1-L08	Layer 3	Ceramic sherd	ceramic	body	2.8	fine cordmarked	Xindian	fine	grey brown
FCN4729	105	2017	Huizuiwa	Lintao	17LH-T1-L08	Layer 3	Ceramic sherd	ceramic	body	2.3	fine cordmarked	Xindian	fine	orange (grey core)
FCN4729	27	2017	Huizuiwa	Lintao	17LH-T1-L08	Layer 3	Ceramic sherd	ceramic	body	9.7	fine cordmarked	Xindian	fine sand	brown
FCN4729	152	2017	Huizuiwa	Lintao	17LH-T1-L08	Layer 3	Ceramic sherd	ceramic	body	4	fine cordmarked	Xindian	fine sand	light brown (grey core)
FCN4729	115	2017	Huizuiwa	Lintao	17LH-T1-L08	Layer 3	Ceramic sherd	ceramic	body	2.7	fine cordmarked	Xindian	fine sand	grey
FCN4729	96	2017	Huizuiwa	Lintao	17LH-T1-L08	Layer 3	Ceramic sherd	ceramic	body	3.3	fine cordmarked	Xindian	fine sand	grey (orange core)
FCN4729	153	2017	Huizuiwa	Lintao	17LH-T1-L08	Layer 3	Ceramic sherd	ceramic	body	3	fine cordmarked	Xindian	fine sand	grey (orange core)
FCN4729	162	2017	Huizuiwa	Lintao	17LH-T1-L08	Layer 3	Ceramic sherd	ceramic	body	3.4	fine cordmarked	Xindian	fine sand	grey (orange core)
FCN4729	178	2017	Huizuiwa	Lintao	17LH-T1-L08	Layer 3	Ceramic sherd	ceramic	body	1.7	fine cordmarked	Xindian	fine sand	grey (orange core)
FCN4729	66	2017	Huizuiwa	Lintao	17LH-T1-L08	Layer 3	Ceramic sherd	ceramic	body	2.3	fine cordmarked	Xindian	fine sand	grey brown
FCN4729	88	2017	Huizuiwa	Lintao	17LH-T1-L08	Layer 3	Ceramic sherd	ceramic	body	3.8	fine cordmarked	Xindian	fine sand	orange
FCN4729	91	2017	Huizuiwa	Lintao	17LH-T1-L08	Layer 3	Ceramic sherd	ceramic	body	3.1	fine cordmarked	Xindian	fine sand	orange
FCN4729	127	2017	Huizuiwa	Lintao	17LH-T1-L08	Layer 3	Ceramic sherd	ceramic	body	5.6	fine cordmarked	Xindian	fine sand	orange
FCN4729	47	2017	Huizuiwa	Lintao	17LH-T1-L08	Layer 3	Ceramic sherd	ceramic	body	7	fine cordmarked	Xindian	fine sand	orange (grey core)
FCN4729	80	2017	Huizuiwa	Lintao	17LH-T1-L08	Layer 3	Ceramic sherd	ceramic	body	5.4	fine cordmarked	Xindian	fine sand	orange (grey core)
FCN4729	106	2017	Huizuiwa	Lintao	17LH-T1-L08	Layer 3	Ceramic sherd	ceramic	body	8.7	fine cordmarked	Xindian	fine sand	orange (grey core)
FCN4729	120	2017	Huizuiwa	Lintao	17LH-T1-L08	Layer 3	Ceramic sherd	ceramic	body	1.6	fine cordmarked	Xindian	fine sand	orange (grey core)
FCN4729	84	2017	Huizuiwa	Lintao	17LH-T1-L08	Layer 3	Ceramic sherd	ceramic	body	8.3	fine cordmarked	Xindian	fine sand	orange yellow (grey)
FCN4729	93	2017	Huizuiwa	Lintao	17LH-T1-L08	Layer 3	Ceramic sherd	ceramic	body	2.3	fine cordmarked	Xindian	fine sand	red
FCN4729	147	2017	Huizuiwa	Lintao	17LH-T1-L08	Layer 3	Ceramic sherd	ceramic	body	5.1	fine cordmarked	Xindian	fine sand	red
FCN4729	108	2017	Huizuiwa	Lintao	17LH-T1-L08	Layer 3	Ceramic sherd	ceramic	body	5	fine cordmarked	Xindian	coarse sand	light brown (grey core)
FCN4729	99	2017	Huizuiwa	Lintao	17LH-T1-L08	Layer 3	Ceramic sherd	ceramic	body	8	fine cordmarked	Xindian	coarse sand	grey (orange core)
FCN4729	74	2017	Huizuiwa	Lintao	17LH-T1-L08	Layer 3	Ceramic sherd	ceramic	body	11.4	fine cordmarked	Xindian	coarse sand	grey brown (red)
FCN4729	150	2017	Huizuiwa	Lintao	17LH-T1-L08	Layer 3	Ceramic sherd	ceramic	body	4.2	fine cordmarked	Xindian	coarse sand	orange
FCN4729	28	2017	Huizuiwa	Lintao	17LH-T1-L08	Layer 3	Ceramic sherd	ceramic	body	19.7	fine cordmarked	Xindian	coarse sand	orange yellow
FCN4729	56	2017	Huizuiwa	Lintao	17LH-T1-L08	Layer 3	Ceramic sherd	ceramic	body	14.1	fine cordmarked	Xindian	coarse sand	orange yellow (grey brown)
FCN4729	94	2017	Huizuiwa	Lintao	17LH-T1-L08	Layer 3	Ceramic sherd	ceramic	body	9.3	fine cordmarked	Xindian	coarse sand	red
FCN4729	83	2017	Huizuiwa	Lintao	17LH-T1-L08	Layer 3	Ceramic sherd	ceramic	body	7.2	fine cordmarked	Xindian	coarse sand	red (grey)
FCN4729	4	2017	Huizuiwa	Lintao	17LH-T1-L08	Layer 3	Ceramic sherd	ceramic	body	8.4	fine cordmarked + appliqué	Xindian	fine sand	light brown
FCN4729	14	2017	Huizuiwa	Lintao	17LH-T1-L08	Layer 3	Ceramic sherd	ceramic	body	4.6	fine cordmarked + appliqué	Xindian	fine sand	light brown
FCN4729	1	2017	Huizuiwa	Lintao	17LH-T1-L08	Layer 3	Ceramic sherd	ceramic	body	50.2	slip + fine cordmarked	Xindian	medium sand	grey (orange core)
FCN4729	45	2017	Huizuiwa	Lintao	17LH-T1-L08	Layer 3	Ceramic sherd	ceramic	body	18.2	slip + fine cordmarked	Xindian	medium sand	grey (orange core)
FCN4729	148	2017	Huizuiwa	Lintao	17LH-T1-L08	Layer 3	Ceramic sherd	ceramic	body	3.1	slip + fine cordmarked	Xindian	medium sand	orange
FCN4729	124	2017	Huizuiwa	Lintao	17LH-T1-L08	Layer 3	Ceramic sherd	ceramic	body	2.5	slip + fine cordmarked	Xindian	fine	grey
FCN4729	90	2017	Huizuiwa	Lintao	17LH-T1-L08	Layer 3	Ceramic sherd	ceramic	body	4.6	slip + fine cordmarked	Xindian	fine sand	grey (red core)
FCN4729	70	2017	Huizuiwa	Lintao	17LH-T1-L08	Layer 3	Ceramic sherd	ceramic	body	9.7	slip + fine cordmarked	Xindian	fine sand	orange yellow (grey)
FCN4729	51	2017	Huizuiwa	Lintao	17LH-T1-L08	Layer 3	Ceramic sherd	ceramic	body	15.7	slip + fine cordmarked	Xindian	coarse sand	light brown (grey core)
FCN4729	92	2017	Huizuiwa	Lintao	17LH-T1-L08	Layer 3	Ceramic sherd	ceramic	body	10.1	slip + fine cordmarked	Xindian	coarse sand	grey (red core)
FCN4729	44	2017	Huizuiwa	Lintao	17LH-T1-L08	Layer 3	Ceramic sherd	ceramic	body	3.3	slip + black pigment + fine cordmarked	Xindian	fine	light brown
FCN4729	46	2017	Huizuiwa	Lintao	17LH-T1-L08	Layer 3	Ceramic sherd	ceramic	body	11.4	line incisions	Xindian	coarse sand	orange (grey core)
FCN4729	110	2017	Huizuiwa	Lintao	17LH-T1-L08	Layer 3	Ceramic sherd	ceramic	body	3.3	plain	Xindian	medium sand	light brown
FCN4729	111	2017	Huizuiwa	Lintao	17LH-T1-L08	Layer 3	Ceramic sherd	ceramic	body	3.5	plain	Xindian	medium sand	light brown
FCN4729	160	2017	Huizuiwa	Lintao	17LH-T1-L08	Layer 3	Ceramic sherd	ceramic	body	2.5	plain	Xindian	medium sand	light brown
FCN4729	75	2017	Huizuiwa	Lintao	17LH-T1-L08	Layer 3	Ceramic sherd	ceramic	body	10.2	plain	Xindian	medium sand	light brown (grey core)
FCN4729	79	2017	Huizuiwa	Lintao	17LH-T1-L08	Layer 3	Ceramic sherd	ceramic	body	8.1	plain	Xindian	medium sand	grey
FCN4729	103	2017	Huizuiwa	Lintao	17LH-T1-L08	Layer 3	Ceramic sherd	ceramic	body	5.2	plain	Xindian	medium sand	grey (brown core)
FCN4729	52	2017	Huizuiwa	Lintao	17LH-T1-L08	Layer 3	Ceramic sherd	ceramic	body	15.6	plain	Xindian	medium sand	grey (red core)
FCN4729	151	2017	Huizuiwa	Lintao	17LH-T1-L08	Layer 3	Ceramic sherd	ceramic	body	5	plain	Xindian	medium sand	grey
FCN4729	102	2017	Huizuiwa	Lintao	17LH-T1-L08	Layer 3	Ceramic sherd	ceramic	body	7.4	plain	Xindian	medium sand	grey (orange core)
FCN4729	59	2017	Huizuiwa	Lintao	17LH-T1-L08	Layer 3	Ceramic sherd	ceramic	body	8.1	plain	Xindian	medium sand	grey (red brown core)
FCN4729	81	2017	Huizuiwa	Lintao	17LH-T1-L08	Layer 3	Ceramic sherd	ceramic	body	8.7	plain	Xindian	medium sand	grey brown
FCN4729	155	2017	Huizuiwa	Lintao	17LH-T1-L08	Layer 3	Ceramic sherd	ceramic	body	3.7	plain	Xindian	medium sand	grey brown
FCN4729	173	2017	Huizuiwa	Lintao	17LH-T1-L08	Layer 3	Ceramic sherd	ceramic	body	2.7	plain	Xindian	medium sand	grey brown
FCN4729	2	2017	Huizuiwa	Lintao	17LH-T1-L08	Layer 3	Ceramic sherd	ceramic	body	11	plain	Xindian	medium sand	orange (grey core)
FCN4729	7	2017	Huizuiwa	Lintao	17LH-T1-L08	Layer 3	Ceramic sherd	ceramic	body	3.1	plain	Xindian	fine	light brown
FCN4729	166	2017	Huizuiwa	Lintao	17LH-T1-L08	Layer 3	Ceramic sherd	ceramic	body	1.9	plain	Xindian	fine	grey
FCN4729	181	2017	Huizuiwa	Lintao	17LH-T1-L08	Layer 3	Ceramic sherd	ceramic	body	0.7	plain	Xindian	fine	grey (brown core)
FCN4729	130	2017	Huizuiwa	Lintao	17LH-T1-L08	Layer 3	Ceramic sherd	ceramic	body	5.7	plain	Xindian	fine	grey
FCN4729	154	2017	Huizuiwa	Lintao	17LH-T1-L08	Layer 3	Ceramic sherd	ceramic	body	2.5	plain	Xindian	fine	grey
FCN4729	113	2017	Huizuiwa	Lintao	17LH-T1-L08	Layer 3	Ceramic sherd	ceramic	body	2.5	plain	Xindian	fine	grey (orange core)
FCN4729	76	2017	Huizuiwa	Lintao	17LH-T1-L08	Layer 3	Ceramic sherd	ceramic	body	10.2	plain	Xindian	fine	grey brown
FCN4729	8	2017	Huizuiwa	Lintao	17LH-T1-L08	Layer 3	Ceramic sherd	ceramic	body	5.4	plain	Xindian	fine	grey brown
FCN4729	171	2017	Huizuiwa	Lintao	17LH-T1-L08	Layer 3	Ceramic sherd	ceramic	body	0.8	plain	Xindian	fine	orange
FCN4729	172	2017	Huizuiwa	Lintao	17LH-T1-L08	Layer 3	Ceramic sherd	ceramic	body	1.4	plain	Xindian	fine	orange (red brown)
FCN4729	182	2017	Huizuiwa	Lintao	17LH-T1-L08	Layer 3	Ceramic sherd	ceramic	body	2	plain	Xindian	fine	orange yellow (grey)
FCN4729	5	2017	Huizuiwa	Lintao	17LH-T1-L08	Layer 3	Ceramic sherd	ceramic	body	2.1	plain	Xindian	fine sand	light brown (grey core)
FCN4729	165	2017	Huizuiwa	Lintao	17LH-T1-L08	Layer 3	Ceramic sherd	ceramic	body	2.4	plain	Xindian	fine sand	light brown (grey core)
FCN4729	50	2017	Huizuiwa	Lintao	17LH-T1-L08	Layer 3	Ceramic sherd	ceramic	body	6.2	plain	Xindian	fine sand	light brown (grey core)
FCN4729	176	2017	Huizuiwa	Lintao	17LH-T1-L08	Layer 3	Ceramic sherd	ceramic	body	2.4	plain	Xindian	fine sand	grey
FCN4729	163	2017	Huizuiwa	Lintao	17LH-T1-L08	Layer 3	Ceramic sherd	ceramic	body	1.6	plain	Xindian	fine sand	grey (brown core)
FCN4729	138	2017	Huizuiwa	Lintao	17LH-T1-L08	Layer 3	Ceramic sherd	ceramic	body	4	plain	Xindian	fine sand	grey (red core)
FCN4729	144	2017	Huizuiwa	Lintao	17LH-T1-L08	Layer 3	Ceramic sherd	ceramic	body	3.7	plain	Xindian	fine sand	grey (red core)
FCN4729	168	2017	Huizuiwa	Lintao	17LH-T1-L08	Layer 3	Ceramic sherd	ceramic	body	1.7	plain	Xindian	fine sand	grey
FCN4729	21	2017	Huizuiwa	Lintao	17LH-T1-L08	Layer 3	Ceramic sherd	ceramic	base	3	plain	Xindian	fine sand	grey
FCN4729	26	2017	Huizuiwa	Lintao	17LH-T1-L08	Layer 3	Ceramic sherd	ceramic	base	8.2	plain	Xindian	fine sand	grey
FCN4729	170	2017	Huizuiwa	Lintao	17LH-T1-L08	Layer 3	Ceramic sherd	ceramic	body	2.7	plain	Xindian	fine sand	grey (brown core)
FCN4729	139	2017	Huizuiwa	Lintao	17LH-T1-L08	Layer 3	Ceramic sherd	ceramic	body	2.7	plain	Xindian	fine sand	grey (red core)
FCN4729	137	2017	Huizuiwa	Lintao	17LH-T1-L08	Layer 3	Ceramic sherd	ceramic	body	3.6	plain	Xindian	fine sand	grey brown (orange)
FCN4729	179	2017	Huizuiwa	Lintao	17LH-T1-L08	Layer 3	Ceramic sherd	ceramic	body	0.7	plain	Xindian	fine sand	orange
FCN4729	6	2017	Huizuiwa	Lintao	17LH-T1-L08	Layer 3	Ceramic sherd	ceramic	body	2.1	plain	Xindian	fine sand	orange
FCN4729	136	2017	Huizuiwa	Lintao	17LH-T1-L08	Layer 3	Ceramic sherd	ceramic	body	2.2	plain	Xindian	fine sand	red
FCN4729	129	2017	Huizuiwa	Lintao	17LH-T1-L08	Layer 3	Ceramic sherd	ceramic	body	3.4	plain	Xindian	fine sand	red (grey)
FCN4729	117	2017	Huizuiwa	Lintao	17LH-T1-L08	Layer 3	Ceramic sherd	ceramic	body	1.5	plain	Xindian	fine sand	red brown
FCN4729	109	2017	Huizuiwa	Lintao	17LH-T1-L08	Layer 3	Ceramic sherd	ceramic	body	7	plain	Xindian	coarse sand	light brown (grey core)
FCN4729	100	2017	Huizuiwa	Lintao	17LH-T1-L08	Layer 3	Ceramic sherd	ceramic	body	10.7	plain	Xindian	coarse sand	grey (orange core)
FCN4729	19	2017	Huizuiwa	Lintao	17LH-T1-L08	Layer 3	Ceramic sherd	ceramic	base	17.8	plain	Xindian	coarse sand	grey (orange yellow)
FCN4729	20	2017	Huizuiwa	Lintao	17LH-T1-L08	Layer 3	Ceramic sherd	ceramic	base	19.4	plain	Xindian	coarse sand	grey (orange yellow)
FCN4729	62	2017	Huizuiwa	Lintao	17LH-T1-L08	Layer 3	Ceramic sherd	ceramic	body	12.6	plain	Xindian	coarse sand	orange
FCN4729	95	2017	Huizuiwa	Lintao	17LH-T1-L08	Layer 3	Ceramic sherd	ceramic	body	7.3	plain	Xindian	coarse sand	orange
FCN4729	157	2017	Huizuiwa	Lintao	17LH-T1-L08	Layer 3	Ceramic sherd	ceramic	body	7.1	plain	Xindian	coarse sand	orange
FCN4729	60	2017	Huizuiwa	Lintao	17LH-T1-L08	Layer 3	Ceramic sherd	ceramic	body	16.4	plain	Xindian	coarse sand	orange (grey core)
FCN4729	87	2017	Huizuiwa	Lintao	17LH-T1-L08	Layer 3	Ceramic sherd	ceramic	body	11.7	plain	Xindian	coarse sand	yellow brown (orange)
FCN4729	58	2017	Huizuiwa	Lintao	17LH-T1-L08	Layer 3	Ceramic sherd	ceramic	body	16.7	plain	Xindian	coarse sand	yellow brown (white)
FCN4729	123	2017	Huizuiwa	Lintao	17LH-T1-L08	Layer 3	Ceramic sherd	ceramic	body	1.1	plain	Qijia	fine	grey
FCN4729	125	2017	Huizuiwa	Lintao	17LH-T1-L08	Layer 3	Ceramic sherd	ceramic	body	3.8	plain	Qijia	fine	grey
FCN4729	158	2017	Huizuiwa	Lintao	17LH-T1-L08	Layer 3	Ceramic sherd	ceramic	body	2.5	plain	Qijia	fine	grey brown
FCN4729	186	2017	Huizuiwa	Lintao	17LH-T1-L08	Layer 3	Burnt earth	Fired earth	N/A	2.4	plain	Xindian	fine	light brown
FCN4729	25	2017	Huizuiwa	Lintao	17LH-T1-L08	Layer 3	Ceramic sherd	ceramic	body	19.5	polish	Xindian	fine sand	grey brown
FCN4729	114	2017	Huizuiwa	Lintao	17LH-T1-L08	Layer 3	Ceramic sherd	ceramic	body	2.5	slip	Xindian	fine	orange
FCN4729	77	2017	Huizuiwa	Lintao	17LH-T1-L08	Layer 3	Ceramic sherd	ceramic	body	6	slip	Xindian	fine sand	light brown
FCN4729	73	2017	Huizuiwa	Lintao	17LH-T1-L08	Layer 3	Ceramic sherd	ceramic	body	5.3	slip	Xindian	fine sand	light brown (grey core)
FCN4729	89	2017	Huizuiwa	Lintao	17LH-T1-L08	Layer 3	Ceramic sherd	ceramic	body	5.3	slip	Xindian	fine sand	orange
FCN4729	119	2017	Huizuiwa	Lintao	17LH-T1-L08	Layer 3	Ceramic sherd	ceramic	body	2.3	slip	Xindian	fine sand	orange
FCN4729	121	2017	Huizuiwa	Lintao	17LH-T1-L08	Layer 3	Ceramic sherd	ceramic	body	4.1	slip	Xindian	fine sand	orange (grey core)
FCN4729	183	2017	Huizuiwa	Lintao	17LH-T1-L08	Layer 3	Ceramic sherd	ceramic	body	2.2	slip	Xindian	fine sand	orange yellow (brown)
FCN4729	85	2017	Huizuiwa	Lintao	17LH-T1-L08	Layer 3	Ceramic sherd	ceramic	body	8.9	slip	Xindian	coarse sand	orange
FCN4729	78	2017	Huizuiwa	Lintao	17LH-T1-L08	Layer 3	Ceramic sherd	ceramic	body	10.2	slip	Xindian	coarse sand	yellow brown (white)
FCN4729	174	2017	Huizuiwa	Lintao	17LH-T1-L08	Layer 3	Ceramic sherd	ceramic	body	1.6	slip + black pigment	Xindian	medium sand	yellow brown
FCN4729	36	2017	Huizuiwa	Lintao	17LH-T1-L08	Layer 3	Ceramic sherd	ceramic	body	1.4	slip + black pigment	Xindian	fine	orange (grey core)
FCN4729	49	2017	Huizuiwa	Lintao	17LH-T1-L08	Layer 3	Ceramic sherd	ceramic	body	4.1	slip + black pigment	Xindian	fine	orange (grey brown)
FCN4729	143	2017	Huizuiwa	Lintao	17LH-T1-L08	Layer 3	Ceramic sherd	ceramic	body	3.8	slip + black pigment	Xindian	fine	orange yellow
FCN4729	128	2017	Huizuiwa	Lintao	17LH-T1-L08	Layer 3	Ceramic sherd	ceramic	body	3.9	slip + black pigment	Xindian	fine sand	orange
FCN4729	43	2017	Huizuiwa	Lintao	17LH-T1-L08	Layer 3	Ceramic sherd	ceramic	body	2.6	slip + black pigment	Xindian	fine sand	orange (grey core)
FCN4729	24	2017	Huizuiwa	Lintao	17LH-T1-L08	Layer 3	Ceramic sherd	ceramic	base	14.7	slip + black pigment	Xindian	fine sand	yellow brown (grey)
FCN4729	180	2017	Huizuiwa	Lintao	17LH-T1-L08	Layer 3	Ceramic sherd	ceramic	body	0.8	white pigment	Xindian	fine	orange
FCN4729	131	2017	Huizuiwa	Lintao	17LH-T1-L08	Layer 3	Ceramic sherd	ceramic	body	3.2	white pigment	Xindian	coarse sand	orange (grey core)
FCN4733	1	2017	Huizuiwa	Lintao	17LH-T1-L08	Layer 3	Ceramic sherd	ceramic	body	2.3	plain	Xindian	fine	light brown
FCN4737	57	2017	Huizuiwa	Lintao	17LH-T1-L09	Layer 3	Ceramic sherd	ceramic	body	1.4	appliqué	Xindian	fine sand	orange
FCN4737	12	2017	Huizuiwa	Lintao	17LH-T1-L09	Layer 3	Ceramic sherd	ceramic	body	6.8	black pigment	Xindian	medium sand	orange
FCN4737	36	2017	Huizuiwa	Lintao	17LH-T1-L09	Layer 3	Ceramic sherd	ceramic	body	2.7	black pigment	Xindian	fine	orange
FCN4737	58	2017	Huizuiwa	Lintao	17LH-T1-L09	Layer 3	Ceramic sherd	ceramic	body	0.6	black pigment	Xindian	fine	orange
FCN4737	63	2017	Huizuiwa	Lintao	17LH-T1-L09	Layer 3	Ceramic sherd	ceramic	body	0.6	black pigment	Xindian	fine	orange
FCN4737	6	2017	Huizuiwa	Lintao	17LH-T1-L09	Layer 3	Ceramic sherd	ceramic	body	7.1	black pigment	Xindian	fine sand	orange
FCN4737	19	2017	Huizuiwa	Lintao	17LH-T1-L09	Layer 3	Ceramic sherd	ceramic	body	7	black pigment	Xindian	fine sand	orange
FCN4737	39	2017	Huizuiwa	Lintao	17LH-T1-L09	Layer 3	Ceramic sherd	ceramic	body	4	black pigment	Xindian	fine sand	orange
FCN4737	43	2017	Huizuiwa	Lintao	17LH-T1-L09	Layer 3	Ceramic sherd	ceramic	body	1.8	black pigment	Xindian	fine sand	orange
FCN4737	47	2017	Huizuiwa	Lintao	17LH-T1-L09	Layer 3	Ceramic sherd	ceramic	body	1.5	black pigment	Xindian	fine sand	orange
FCN4737	54	2017	Huizuiwa	Lintao	17LH-T1-L09	Layer 3	Ceramic sherd	ceramic	handle	2	black pigment	Xindian	fine sand	orange
FCN4737	27	2017	Huizuiwa	Lintao	17LH-T1-L09	Layer 3	Ceramic sherd	ceramic	body	4.6	black pigment	Xindian	fine sand	orange yellow
FCN4737	24	2017	Huizuiwa	Lintao	17LH-T1-L09	Layer 3	Ceramic sherd	ceramic	handle	10	black pigment	Xindian	fine sand	orange yellow
FCN4737	3	2017	Huizuiwa	Lintao	17LH-T1-L09	Layer 3	Ceramic sherd	ceramic	handle	4.7	black pigment	Xindian	fine sand	yellow brown
FCN4737	61	2017	Huizuiwa	Lintao	17LH-T1-L09	Layer 3	Ceramic sherd	ceramic	body	1	black pigment + red pigment	Xindian	fine sand	orange yellow
FCN4737	21	2017	Huizuiwa	Lintao	17LH-T1-L09	Layer 3	Ceramic sherd	ceramic	body	4.3	cordmarked	Xindian	fine sand	orange
FCN4737	13	2017	Huizuiwa	Lintao	17LH-T1-L09	Layer 3	Ceramic sherd	ceramic	body	6.5	fine cordmarked	Xindian	medium sand	grey
FCN4737	34	2017	Huizuiwa	Lintao	17LH-T1-L09	Layer 3	Ceramic sherd	ceramic	body	4.8	fine cordmarked	Xindian	medium sand	grey
FCN4737	40	2017	Huizuiwa	Lintao	17LH-T1-L09	Layer 3	Ceramic sherd	ceramic	body	2.5	fine cordmarked	Xindian	medium sand	grey
FCN4737	5	2017	Huizuiwa	Lintao	17LH-T1-L09	Layer 3	Ceramic sherd	ceramic	body	12.7	fine cordmarked	Xindian	medium sand	orange
FCN4737	10	2017	Huizuiwa	Lintao	17LH-T1-L09	Layer 3	Ceramic sherd	ceramic	body	8.9	fine cordmarked	Xindian	medium sand	orange
FCN4737	11	2017	Huizuiwa	Lintao	17LH-T1-L09	Layer 3	Ceramic sherd	ceramic	body	8.1	fine cordmarked	Xindian	medium sand	orange
FCN4737	25	2017	Huizuiwa	Lintao	17LH-T1-L09	Layer 3	Ceramic sherd	ceramic	body	12.1	fine cordmarked	Xindian	medium sand	orange
FCN4737	33	2017	Huizuiwa	Lintao	17LH-T1-L09	Layer 3	Ceramic sherd	ceramic	body	5.6	fine cordmarked	Xindian	medium sand	orange
FCN4737	1	2017	Huizuiwa	Lintao	17LH-T1-L09	Layer 3	Ceramic sherd	ceramic	body	23	fine cordmarked	Xindian	medium sand	orange yellow
FCN4737	30	2017	Huizuiwa	Lintao	17LH-T1-L09	Layer 3	Ceramic sherd	ceramic	body	9.6	fine cordmarked	Xindian	medium sand	orange yellow
FCN4737	22	2017	Huizuiwa	Lintao	17LH-T1-L09	Layer 3	Ceramic sherd	ceramic	body	6.6	fine cordmarked	Xindian	fine sand	grey
FCN4737	50	2017	Huizuiwa	Lintao	17LH-T1-L09	Layer 3	Ceramic sherd	ceramic	body	3.2	fine cordmarked	Xindian	fine sand	grey
FCN4737	7	2017	Huizuiwa	Lintao	17LH-T1-L09	Layer 3	Ceramic sherd	ceramic	body	8.4	fine cordmarked	Xindian	fine sand	orange
FCN4737	8	2017	Huizuiwa	Lintao	17LH-T1-L09	Layer 3	Ceramic sherd	ceramic	body	14.2	fine cordmarked	Xindian	fine sand	orange
FCN4737	48	2017	Huizuiwa	Lintao	17LH-T1-L09	Layer 3	Ceramic sherd	ceramic	body	1.8	fine cordmarked	Xindian	fine sand	orange
FCN4737	51	2017	Huizuiwa	Lintao	17LH-T1-L09	Layer 3	Ceramic sherd	ceramic	body	1.2	fine cordmarked	Xindian	fine sand	orange
FCN4737	55	2017	Huizuiwa	Lintao	17LH-T1-L09	Layer 3	Ceramic sherd	ceramic	body	1.5	fine cordmarked	Xindian	fine sand	orange
FCN4737	62	2017	Huizuiwa	Lintao	17LH-T1-L09	Layer 3	Ceramic sherd	ceramic	body	1.8	fine cordmarked	Xindian	fine sand	orange
FCN4737	2	2017	Huizuiwa	Lintao	17LH-T1-L09	Layer 3	Ceramic sherd	ceramic	foot	22.7	fine cordmarked	Xindian	coarse sand	orange
FCN4737	45	2017	Huizuiwa	Lintao	17LH-T1-L09	Layer 3	Ceramic sherd	ceramic	body	3.8	plain	Xindian	medium sand	brown
FCN4737	59	2017	Huizuiwa	Lintao	17LH-T1-L09	Layer 3	Ceramic sherd	ceramic	body	2.9	plain	Xindian	medium sand	brown
FCN4737	4	2017	Huizuiwa	Lintao	17LH-T1-L09	Layer 3	Ceramic sherd	ceramic	body	11	plain	Xindian	medium sand	grey
FCN4737	26	2017	Huizuiwa	Lintao	17LH-T1-L09	Layer 3	Ceramic sherd	ceramic	body	7.9	plain	Xindian	medium sand	orange
FCN4737	38	2017	Huizuiwa	Lintao	17LH-T1-L09	Layer 3	Ceramic sherd	ceramic	body	3.7	plain	Xindian	medium sand	orange
FCN4737	60	2017	Huizuiwa	Lintao	17LH-T1-L09	Layer 3	Ceramic sherd	ceramic	body	1.2	plain	Xindian	fine	grey
FCN4737	20	2017	Huizuiwa	Lintao	17LH-T1-L09	Layer 3	Ceramic sherd	ceramic	body	2.9	plain	Xindian	fine	orange
FCN4737	37	2017	Huizuiwa	Lintao	17LH-T1-L09	Layer 3	Ceramic sherd	ceramic	body	2.8	plain	Xindian	fine	orange
FCN4737	56	2017	Huizuiwa	Lintao	17LH-T1-L09	Layer 3	Ceramic sherd	ceramic	body	1	plain	Xindian	fine	orange yellow
FCN4737	41	2017	Huizuiwa	Lintao	17LH-T1-L09	Layer 3	Ceramic sherd	ceramic	body	2	plain	Xindian	fine sand	brown
FCN4737	32	2017	Huizuiwa	Lintao	17LH-T1-L09	Layer 3	Ceramic sherd	ceramic	body	3.5	plain	Xindian	fine sand	grey
FCN4737	16	2017	Huizuiwa	Lintao	17LH-T1-L09	Layer 3	Ceramic sherd	ceramic	body	9.5	plain	Xindian	fine sand	orange
FCN4737	31	2017	Huizuiwa	Lintao	17LH-T1-L09	Layer 3	Ceramic sherd	ceramic	body	1	plain	Xindian	fine sand	orange
FCN4737	35	2017	Huizuiwa	Lintao	17LH-T1-L09	Layer 3	Ceramic sherd	ceramic	body	3.5	plain	Xindian	fine sand	orange
FCN4737	42	2017	Huizuiwa	Lintao	17LH-T1-L09	Layer 3	Ceramic sherd	ceramic	body	3.9	plain	Xindian	fine sand	orange
FCN4737	52	2017	Huizuiwa	Lintao	17LH-T1-L09	Layer 3	Ceramic sherd	ceramic	body	1.9	plain	Xindian	fine sand	orange
FCN4737	53	2017	Huizuiwa	Lintao	17LH-T1-L09	Layer 3	Ceramic sherd	ceramic	body	2.1	plain	Xindian	fine sand	orange
FCN4737	14	2017	Huizuiwa	Lintao	17LH-T1-L09	Layer 3	Ceramic sherd	ceramic	body	7.3	plain	Xindian	fine sand	white
FCN4737	49	2017	Huizuiwa	Lintao	17LH-T1-L09	Layer 3	Ceramic sherd	ceramic	body	2.5	plain	Xindian	fine sand	yellow brown
FCN4737	46	2017	Huizuiwa	Lintao	17LH-T1-L09	Layer 3	Ceramic sherd	ceramic	body	1.1	slip	Xindian	fine	orange
FCN4737	17	2017	Huizuiwa	Lintao	17LH-T1-L09	Layer 3	Ceramic sherd	ceramic	body	18.5	slip + black pigment	Xindian	medium sand	orange
FCN4737	9	2017	Huizuiwa	Lintao	17LH-T1-L09	Layer 3	Ceramic sherd	ceramic	body	9	slip + black pigment	Xindian	fine sand	grey
FCN4737	18	2017	Huizuiwa	Lintao	17LH-T1-L09	Layer 3	Ceramic sherd	ceramic	body	5.4	slip + black pigment	Xindian	fine sand	orange
FCN4737	44	2017	Huizuiwa	Lintao	17LH-T1-L09	Layer 3	Ceramic sherd	ceramic	body	1.8	slip + black pigment	Xindian	fine sand	orange
FCN4737	29	2017	Huizuiwa	Lintao	17LH-T1-L09	Layer 3	Ceramic sherd	ceramic	body	5.2	slip + black pigment	Xindian	fine sand	orange yellow
FCN4737	28	2017	Huizuiwa	Lintao	17LH-T1-L09	Layer 3	Ceramic sherd	ceramic	body	3.6	slip + black pigment + red pigment	Xindian	fine sand	orange yellow
FCN4737	15	2017	Huizuiwa	Lintao	17LH-T1-L09	Layer 3	Ceramic sherd	ceramic	body	7.8	slip + fine cordmarked	Xindian	medium sand	orange
FCN4737	23	2017	Huizuiwa	Lintao	17LH-T1-L09	Layer 3	Ceramic sherd	ceramic	body	8.4	slip + white pigment	Xindian	fine sand	orange
FCN4742	30	2017	Huizuiwa	Lintao	17LH-T1-L10	Layer 3	Ceramic sherd	ceramic	body	6	appliqué	Xindian	medium sand	grey brown
FCN4742	9	2017	Huizuiwa	Lintao	17LH-T1-L10	Layer 3	Ceramic sherd	ceramic	body	10.4	appliqué	Xindian	medium sand	orange
FCN4742	11	2017	Huizuiwa	Lintao	17LH-T1-L10	Layer 3	Ceramic sherd	ceramic	body	12.9	appliqué	Xindian	fine sand	orange yellow
FCN4742	37	2017	Huizuiwa	Lintao	17LH-T1-L10	Layer 3	Ceramic sherd	ceramic	body	6.4	appliqué + incisions	Xindian	fine	orange
FCN4742	31	2017	Huizuiwa	Lintao	17LH-T1-L10	Layer 3	Ceramic sherd	ceramic	body	2.7	black pigment	Xindian	fine	grey
FCN4742	54	2017	Huizuiwa	Lintao	17LH-T1-L10	Layer 3	Ceramic sherd	ceramic	body	1.1	black pigment	Xindian	fine	grey
FCN4742	61	2017	Huizuiwa	Lintao	17LH-T1-L10	Layer 3	Ceramic sherd	ceramic	body	1	black pigment	Xindian	fine	grey
FCN4742	35	2017	Huizuiwa	Lintao	17LH-T1-L10	Layer 3	Ceramic sherd	ceramic	body	3.9	black pigment	Xindian	fine	grey brown
FCN4742	13	2017	Huizuiwa	Lintao	17LH-T1-L10	Layer 3	Ceramic sherd	ceramic	body	3.2	black pigment	Xindian	fine	orange yellow
FCN4742	34	2017	Huizuiwa	Lintao	17LH-T1-L10	Layer 3	Ceramic sherd	ceramic	body	1.6	black pigment	Xindian	fine	orange yellow
FCN4742	56	2017	Huizuiwa	Lintao	17LH-T1-L10	Layer 3	Ceramic sherd	ceramic	body	0.8	black pigment	Xindian	fine	orange yellow
FCN4742	69	2017	Huizuiwa	Lintao	17LH-T1-L10	Layer 3	Ceramic sherd	ceramic	body	0.6	black pigment	Xindian	fine	orange yellow
FCN4742	70	2017	Huizuiwa	Lintao	17LH-T1-L10	Layer 3	Ceramic sherd	ceramic	body	1.2	black pigment	Xindian	fine	orange yellow
FCN4742	71	2017	Huizuiwa	Lintao	17LH-T1-L10	Layer 3	Ceramic sherd	ceramic	body	1.5	black pigment	Xindian	fine sand	grey brown
FCN4742	74	2017	Huizuiwa	Lintao	17LH-T1-L10	Layer 3	Ceramic sherd	ceramic	body	1.2	black pigment	Xindian	fine sand	grey brown
FCN4742	73	2017	Huizuiwa	Lintao	17LH-T1-L10	Layer 3	Ceramic sherd	ceramic	body	1.2	black pigment	Xindian	fine sand	orange
FCN4742	25	2017	Huizuiwa	Lintao	17LH-T1-L10	Layer 3	Ceramic sherd	ceramic	body	4.1	black pigment	Xindian	fine sand	orange
FCN4742	75	2017	Huizuiwa	Lintao	17LH-T1-L10	Layer 3	Ceramic sherd	ceramic	body	1.6	black pigment	Xindian	fine sand	orange yellow
FCN4742	48	2017	Huizuiwa	Lintao	17LH-T1-L10	Layer 3	Ceramic sherd	ceramic	body	1	black pigment + fine cordmarked	Xindian	fine	orange yellow
FCN4742	16	2017	Huizuiwa	Lintao	17LH-T1-L10	Layer 3	Ceramic sherd	ceramic	body	8	black pigment + fine cordmarked	Xindian	fine sand	grey brown
FCN4742	47	2017	Huizuiwa	Lintao	17LH-T1-L10	Layer 3	Ceramic sherd	ceramic	body	1.1	black pigment + red pigment	Xindian	fine	orange yellow
FCN4742	1	2017	Huizuiwa	Lintao	17LH-T1-L10	Layer 3	Ceramic sherd	ceramic	body	63.7	fine cordmarked	Xindian	medium sand	orange
FCN4742	5	2017	Huizuiwa	Lintao	17LH-T1-L10	Layer 3	Ceramic sherd	ceramic	body	14.5	fine cordmarked	Xindian	medium sand	orange
FCN4742	6	2017	Huizuiwa	Lintao	17LH-T1-L10	Layer 3	Ceramic sherd	ceramic	body	18.2	fine cordmarked	Xindian	medium sand	orange
FCN4742	21	2017	Huizuiwa	Lintao	17LH-T1-L10	Layer 3	Ceramic sherd	ceramic	body	6.2	fine cordmarked	Xindian	medium sand	orange
FCN4742	26	2017	Huizuiwa	Lintao	17LH-T1-L10	Layer 3	Ceramic sherd	ceramic	body	5.2	fine cordmarked	Xindian	medium sand	orange
FCN4742	18	2017	Huizuiwa	Lintao	17LH-T1-L10	Layer 3	Ceramic sherd	ceramic	body	6	fine cordmarked	Xindian	fine sand	grey brown
FCN4742	20	2017	Huizuiwa	Lintao	17LH-T1-L10	Layer 3	Ceramic sherd	ceramic	body	4.3	fine cordmarked	Xindian	fine sand	orange
FCN4742	51	2017	Huizuiwa	Lintao	17LH-T1-L10	Layer 3	Ceramic sherd	ceramic	body	1.6	fine cordmarked	Xindian	fine sand	orange
FCN4742	62	2017	Huizuiwa	Lintao	17LH-T1-L10	Layer 3	Ceramic sherd	ceramic	body	2.2	fine cordmarked	Xindian	fine sand	orange
FCN4742	65	2017	Huizuiwa	Lintao	17LH-T1-L10	Layer 3	Ceramic sherd	ceramic	body	1	fine cordmarked	Xindian	fine sand	orange
FCN4742	42	2017	Huizuiwa	Lintao	17LH-T1-L10	Layer 3	Ceramic sherd	ceramic	body	1.9	fine cordmarked	Xindian	fine sand	orange yellow
FCN4742	17	2017	Huizuiwa	Lintao	17LH-T1-L10	Layer 3	Ceramic sherd	ceramic	body	12	fine cordmarked	Xindian	coarse sand	grey brown
FCN4742	7	2017	Huizuiwa	Lintao	17LH-T1-L10	Layer 3	Ceramic sherd	ceramic	body	12.9	fine cordmarked + incisions	Xindian	fine sand	orange
FCN4742	8	2017	Huizuiwa	Lintao	17LH-T1-L10	Layer 3	Ceramic sherd	ceramic	body	13.5	plain	Xindian	medium sand	orange
FCN4742	27	2017	Huizuiwa	Lintao	17LH-T1-L10	Layer 3	Ceramic sherd	ceramic	body	3.3	plain	Xindian	medium sand	orange
FCN4742	29	2017	Huizuiwa	Lintao	17LH-T1-L10	Layer 3	Ceramic sherd	ceramic	body	5.5	plain	Xindian	medium sand	orange
FCN4742	41	2017	Huizuiwa	Lintao	17LH-T1-L10	Layer 3	Ceramic sherd	ceramic	body	7.1	plain	Xindian	medium sand	orange
FCN4742	59	2017	Huizuiwa	Lintao	17LH-T1-L10	Layer 3	Ceramic sherd	ceramic	body	2.2	plain	Xindian	medium sand	orange
FCN4742	39	2017	Huizuiwa	Lintao	17LH-T1-L10	Layer 3	Ceramic sherd	ceramic	body	4.1	plain	Xindian	medium sand	orange
FCN4742	45	2017	Huizuiwa	Lintao	17LH-T1-L10	Layer 3	Ceramic sherd	ceramic	body	3	plain	Xindian	fine	grey
FCN4742	53	2017	Huizuiwa	Lintao	17LH-T1-L10	Layer 3	Ceramic sherd	ceramic	body	1.2	plain	Xindian	fine	grey
FCN4742	67	2017	Huizuiwa	Lintao	17LH-T1-L10	Layer 3	Ceramic sherd	ceramic	body	1.1	plain	Xindian	fine	grey
FCN4742	15	2017	Huizuiwa	Lintao	17LH-T1-L10	Layer 3	Ceramic sherd	ceramic	base	7.3	plain	Xindian	fine	grey
FCN4742	68	2017	Huizuiwa	Lintao	17LH-T1-L10	Layer 3	Ceramic sherd	ceramic	body	1	plain	Xindian	fine	orange
FCN4742	44	2017	Huizuiwa	Lintao	17LH-T1-L10	Layer 3	Ceramic sherd	ceramic	body	1.8	plain	Xindian	fine	orange yellow
FCN4742	66	2017	Huizuiwa	Lintao	17LH-T1-L10	Layer 3	Ceramic sherd	ceramic	body	0.9	plain	Xindian	fine	white
FCN4742	43	2017	Huizuiwa	Lintao	17LH-T1-L10	Layer 3	Ceramic sherd	ceramic	body	2.7	plain	Xindian	fine sand	brown
FCN4742	2	2017	Huizuiwa	Lintao	17LH-T1-L10	Layer 3	Ceramic sherd	ceramic	body	20.2	plain	Xindian	fine sand	grey
FCN4742	19	2017	Huizuiwa	Lintao	17LH-T1-L10	Layer 3	Ceramic sherd	ceramic	body	7.7	plain	Xindian	fine sand	grey
FCN4742	52	2017	Huizuiwa	Lintao	17LH-T1-L10	Layer 3	Ceramic sherd	ceramic	body	1.8	plain	Xindian	fine sand	grey
FCN4742	55	2017	Huizuiwa	Lintao	17LH-T1-L10	Layer 3	Ceramic sherd	ceramic	body	2.4	plain	Xindian	fine sand	grey
FCN4742	57	2017	Huizuiwa	Lintao	17LH-T1-L10	Layer 3	Ceramic sherd	ceramic	body	1.6	plain	Xindian	fine sand	grey
FCN4742	64	2017	Huizuiwa	Lintao	17LH-T1-L10	Layer 3	Ceramic sherd	ceramic	body	1.7	plain	Xindian	fine sand	grey
FCN4742	76	2017	Huizuiwa	Lintao	17LH-T1-L10	Layer 3	Ceramic sherd	ceramic	body	1.5	plain	Xindian	fine sand	grey
FCN4742	28	2017	Huizuiwa	Lintao	17LH-T1-L10	Layer 3	Ceramic sherd	ceramic	body	3.2	plain	Xindian	fine sand	orange
FCN4742	49	2017	Huizuiwa	Lintao	17LH-T1-L10	Layer 3	Ceramic sherd	ceramic	body	2	plain	Xindian	fine sand	orange
FCN4742	32	2017	Huizuiwa	Lintao	17LH-T1-L10	Layer 3	Ceramic sherd	ceramic	body	2.3	plain	Xindian	fine sand	orange yellow
FCN4742	77	2017	Huizuiwa	Lintao	17LH-T1-L10	Layer 3	Ceramic sherd	ceramic	body	1.2	plain	Xindian	fine sand	orange yellow
FCN4742	78	2017	Huizuiwa	Lintao	17LH-T1-L10	Layer 3	Ceramic sherd	ceramic	body	0.8	plain	Xindian	fine sand	orange yellow
FCN4742	12	2017	Huizuiwa	Lintao	17LH-T1-L10	Layer 3	Ceramic sherd	ceramic	body	6.6	slip	Xindian	medium sand	orange
FCN4742	58	2017	Huizuiwa	Lintao	17LH-T1-L10	Layer 3	Ceramic sherd	ceramic	body	1.3	slip	Xindian	fine	yellow brown
FCN4742	40	2017	Huizuiwa	Lintao	17LH-T1-L10	Layer 3	Ceramic sherd	ceramic	body	4.4	slip + black pigment	Xindian	medium sand	grey
FCN4742	50	2017	Huizuiwa	Lintao	17LH-T1-L10	Layer 3	Ceramic sherd	ceramic	body	0.7	slip + black pigment	Xindian	fine	grey brown
FCN4742	72	2017	Huizuiwa	Lintao	17LH-T1-L10	Layer 3	Ceramic sherd	ceramic	body	0.6	slip + black pigment	Xindian	fine	grey brown
FCN4742	63	2017	Huizuiwa	Lintao	17LH-T1-L10	Layer 3	Ceramic sherd	ceramic	body	0.5	slip + black pigment	Xindian	fine	orange
FCN4742	4	2017	Huizuiwa	Lintao	17LH-T1-L10	Layer 3	Ceramic sherd	ceramic	body	13	slip + black pigment	Xindian	fine sand	grey brown
FCN4742	3	2017	Huizuiwa	Lintao	17LH-T1-L10	Layer 3	Ceramic sherd	ceramic	body	11.5	slip + black pigment	Xindian	fine sand	orange
FCN4742	10	2017	Huizuiwa	Lintao	17LH-T1-L10	Layer 3	Ceramic sherd	ceramic	body	9.8	slip + black pigment	Xindian	fine sand	orange
FCN4742	38	2017	Huizuiwa	Lintao	17LH-T1-L10	Layer 3	Ceramic sherd	ceramic	body	3.3	slip + black pigment	Xindian	fine sand	orange
FCN4742	46	2017	Huizuiwa	Lintao	17LH-T1-L10	Layer 3	Ceramic sherd	ceramic	body	2.1	slip + black pigment	Xindian	fine sand	orange
FCN4742	22	2017	Huizuiwa	Lintao	17LH-T1-L10	Layer 3	Ceramic sherd	ceramic	body	5.5	slip + black pigment	Xindian	fine sand	orange yellow
FCN4742	33	2017	Huizuiwa	Lintao	17LH-T1-L10	Layer 3	Ceramic sherd	ceramic	body	3.1	slip + black pigment	Xindian	fine sand	orange yellow
FCN4742	36	2017	Huizuiwa	Lintao	17LH-T1-L10	Layer 3	Ceramic sherd	ceramic	body	7.5	slip + black pigment + fine cordmarked	Xindian	medium sand	grey brown
FCN4742	24	2017	Huizuiwa	Lintao	17LH-T1-L10	Layer 3	Ceramic sherd	ceramic	body	9.5	slip + black pigment + fine cordmarked	Xindian	medium sand	orange
FCN4742	14	2017	Huizuiwa	Lintao	17LH-T1-L10	Layer 3	Ceramic sherd	ceramic	body	6.1	slip + black pigment + fine cordmarked	Xindian	fine	grey brown
FCN4742	23	2017	Huizuiwa	Lintao	17LH-T1-L10	Layer 3	Ceramic sherd	ceramic	body	3.7	slip + black pigment + red pigment	Xindian	fine	orange yellow
FCN4742	60	2017	Huizuiwa	Lintao	17LH-T1-L10	Layer 3	Ceramic sherd	ceramic	body	4.2	slip + fine cordmarked	Xindian	medium sand	orange
FCN4748	19	2017	Huizuiwa	Lintao	17LH-T1-L11	H4	Ceramic sherd	ceramic	body	7.4	appliqué	Xindian	medium sand	orange
FCN4748	10	2017	Huizuiwa	Lintao	17LH-T1-L11	H4	Ceramic sherd	ceramic	body	8.1	black pigment	Xindian	medium sand	orange
FCN4748	17	2017	Huizuiwa	Lintao	17LH-T1-L11	H4	Ceramic sherd	ceramic	body	7.3	black pigment	Xindian	medium sand	orange
FCN4748	20	2017	Huizuiwa	Lintao	17LH-T1-L11	H4	Ceramic sherd	ceramic	handle	8.8	black pigment	Xindian	medium sand	orange
FCN4748	36	2017	Huizuiwa	Lintao	17LH-T1-L11	H4	Ceramic sherd	ceramic	body	3.3	black pigment	Xindian	fine	orange yellow
FCN4748	80	2017	Huizuiwa	Lintao	17LH-T1-L11	H4	Ceramic sherd	ceramic	body	2.4	black pigment	Xindian	fine sand	grey
FCN4748	102	2017	Huizuiwa	Lintao	17LH-T1-L11	H4	Ceramic sherd	ceramic	body	0.8	black pigment	Xindian	fine sand	grey
FCN4748	66	2017	Huizuiwa	Lintao	17LH-T1-L11	H4	Ceramic sherd	ceramic	body	3.1	black pigment	Xindian	fine sand	grey brown
FCN4748	13	2017	Huizuiwa	Lintao	17LH-T1-L11	H4	Ceramic sherd	ceramic	body	5.8	black pigment	Xindian	fine sand	orange
FCN4748	30	2017	Huizuiwa	Lintao	17LH-T1-L11	H4	Ceramic sherd	ceramic	body	2.6	black pigment	Xindian	fine sand	orange
FCN4748	35	2017	Huizuiwa	Lintao	17LH-T1-L11	H4	Ceramic sherd	ceramic	body	2.8	black pigment	Xindian	fine sand	orange
FCN4748	71	2017	Huizuiwa	Lintao	17LH-T1-L11	H4	Ceramic sherd	ceramic	body	1.9	black pigment	Xindian	fine sand	orange
FCN4748	91	2017	Huizuiwa	Lintao	17LH-T1-L11	H4	Ceramic sherd	ceramic	body	1.3	black pigment	Xindian	fine sand	orange
FCN4748	95	2017	Huizuiwa	Lintao	17LH-T1-L11	H4	Ceramic sherd	ceramic	body	1.2	black pigment	Xindian	fine sand	orange
FCN4748	101	2017	Huizuiwa	Lintao	17LH-T1-L11	H4	Ceramic sherd	ceramic	body	0.6	black pigment	Xindian	fine sand	orange
FCN4748	56	2017	Huizuiwa	Lintao	17LH-T1-L11	H4	Ceramic sherd	ceramic	handle	3.4	black pigment	Xindian	fine sand	orange
FCN4748	84	2017	Huizuiwa	Lintao	17LH-T1-L11	H4	Ceramic sherd	ceramic	handle	1.6	black pigment	Xindian	fine sand	orange
FCN4748	41	2017	Huizuiwa	Lintao	17LH-T1-L11	H4	Ceramic sherd	ceramic	body	2.4	black pigment	Xindian	fine sand	orange yellow
FCN4748	75	2017	Huizuiwa	Lintao	17LH-T1-L11	H4	Ceramic sherd	ceramic	body	2.1	black pigment	Xindian	fine sand	orange yellow
FCN4748	11	2017	Huizuiwa	Lintao	17LH-T1-L11	H4	Ceramic sherd	ceramic	body	3.4	black pigment + red pigment	Xindian	fine sand	grey
FCN4748	76	2017	Huizuiwa	Lintao	17LH-T1-L11	H4	Ceramic sherd	ceramic	body	3.5	black pigment + white pigment	Xindian	fine sand	orange
FCN4748	98	2017	Huizuiwa	Lintao	17LH-T1-L11	H4	Ceramic sherd	ceramic	handle	1.7	black pigment + white pigment	Xindian	fine sand	orange
FCN4748	18	2017	Huizuiwa	Lintao	17LH-T1-L11	H4	Ceramic sherd	ceramic	body	14.3	fine cordmarked	Xindian	medium sand	grey brown
FCN4748	92	2017	Huizuiwa	Lintao	17LH-T1-L11	H4	Ceramic sherd	ceramic	body	2.7	fine cordmarked	Xindian	medium sand	grey brown
FCN4748	16	2017	Huizuiwa	Lintao	17LH-T1-L11	H4	Ceramic sherd	ceramic	body	15.3	fine cordmarked	Xindian	medium sand	orange
FCN4748	46	2017	Huizuiwa	Lintao	17LH-T1-L11	H4	Ceramic sherd	ceramic	body	3.2	fine cordmarked	Xindian	medium sand	orange
FCN4748	52	2017	Huizuiwa	Lintao	17LH-T1-L11	H4	Ceramic sherd	ceramic	body	5.7	fine cordmarked	Xindian	medium sand	orange
FCN4748	54	2017	Huizuiwa	Lintao	17LH-T1-L11	H4	Ceramic sherd	ceramic	body	5.7	fine cordmarked	Xindian	medium sand	orange
FCN4748	63	2017	Huizuiwa	Lintao	17LH-T1-L11	H4	Ceramic sherd	ceramic	body	2.7	fine cordmarked	Xindian	medium sand	orange
FCN4748	9	2017	Huizuiwa	Lintao	17LH-T1-L11	H4	Ceramic sherd	ceramic	base	8	fine cordmarked	Xindian	medium sand	orange
FCN4748	33	2017	Huizuiwa	Lintao	17LH-T1-L11	H4	Ceramic sherd	ceramic	body	6.8	fine cordmarked	Xindian	medium sand	orange yellow
FCN4748	4	2017	Huizuiwa	Lintao	17LH-T1-L11	H4	Ceramic sherd	ceramic	body	13.6	fine cordmarked	Xindian	fine	grey
FCN4748	7	2017	Huizuiwa	Lintao	17LH-T1-L11	H4	Ceramic sherd	ceramic	body	9.9	fine cordmarked	Xindian	fine sand	grey
FCN4748	8	2017	Huizuiwa	Lintao	17LH-T1-L11	H4	Ceramic sherd	ceramic	body	9.1	fine cordmarked	Xindian	fine sand	grey
FCN4748	38	2017	Huizuiwa	Lintao	17LH-T1-L11	H4	Ceramic sherd	ceramic	body	4.2	fine cordmarked	Xindian	fine sand	grey
FCN4748	6	2017	Huizuiwa	Lintao	17LH-T1-L11	H4	Ceramic sherd	ceramic	body	11.6	fine cordmarked	Xindian	fine sand	orange
FCN4748	14	2017	Huizuiwa	Lintao	17LH-T1-L11	H4	Ceramic sherd	ceramic	body	4.9	fine cordmarked	Xindian	fine sand	orange
FCN4748	25	2017	Huizuiwa	Lintao	17LH-T1-L11	H4	Ceramic sherd	ceramic	body	4	fine cordmarked	Xindian	fine sand	orange
FCN4748	28	2017	Huizuiwa	Lintao	17LH-T1-L11	H4	Ceramic sherd	ceramic	body	5.3	fine cordmarked	Xindian	fine sand	orange
FCN4748	47	2017	Huizuiwa	Lintao	17LH-T1-L11	H4	Ceramic sherd	ceramic	body	4.7	fine cordmarked	Xindian	fine sand	orange
FCN4748	60	2017	Huizuiwa	Lintao	17LH-T1-L11	H4	Ceramic sherd	ceramic	body	3.3	fine cordmarked	Xindian	fine sand	orange
FCN4748	62	2017	Huizuiwa	Lintao	17LH-T1-L11	H4	Ceramic sherd	ceramic	body	2.6	fine cordmarked	Xindian	fine sand	orange
FCN4748	64	2017	Huizuiwa	Lintao	17LH-T1-L11	H4	Ceramic sherd	ceramic	body	3.4	fine cordmarked	Xindian	fine sand	orange
FCN4748	79	2017	Huizuiwa	Lintao	17LH-T1-L11	H4	Ceramic sherd	ceramic	body	1.8	fine cordmarked	Xindian	fine sand	orange
FCN4748	81	2017	Huizuiwa	Lintao	17LH-T1-L11	H4	Ceramic sherd	ceramic	body	2.2	fine cordmarked	Xindian	fine sand	orange
FCN4748	82	2017	Huizuiwa	Lintao	17LH-T1-L11	H4	Ceramic sherd	ceramic	body	3.8	fine cordmarked	Xindian	fine sand	orange
FCN4748	100	2017	Huizuiwa	Lintao	17LH-T1-L11	H4	Ceramic sherd	ceramic	body	1	fine cordmarked	Xindian	fine sand	orange
FCN4748	87	2017	Huizuiwa	Lintao	17LH-T1-L11	H4	Ceramic sherd	ceramic	body	1.4	fine cordmarked	Xindian	fine sand	orange
FCN4748	55	2017	Huizuiwa	Lintao	17LH-T1-L11	H4	Ceramic sherd	ceramic	base	4.5	fine cordmarked	Xindian	fine sand	orange
FCN4748	21	2017	Huizuiwa	Lintao	17LH-T1-L11	H4	Ceramic sherd	ceramic	body	3.4	fine cordmarked	Xindian	fine sand	orange yellow
FCN4748	49	2017	Huizuiwa	Lintao	17LH-T1-L11	H4	Ceramic sherd	ceramic	body	1.8	fine cordmarked	Xindian	fine sand	orange yellow
FCN4748	58	2017	Huizuiwa	Lintao	17LH-T1-L11	H4	Ceramic sherd	ceramic	body	2.1	fine cordmarked	Xindian	fine sand	orange yellow
FCN4748	50	2017	Huizuiwa	Lintao	17LH-T1-L11	H4	Ceramic sherd	ceramic	body	5.6	fine cordmarked + appliqué	Xindian	fine sand	orange
FCN4748	61	2017	Huizuiwa	Lintao	17LH-T1-L11	H4	Ceramic sherd	ceramic	body	5.1	black pigment + incisions	Xindian	fine sand	orange
FCN4748	23	2017	Huizuiwa	Lintao	17LH-T1-L11	H4	Ceramic sherd	ceramic	body	6.3	plain	Xindian	medium sand	grey
FCN4748	51	2017	Huizuiwa	Lintao	17LH-T1-L11	H4	Ceramic sherd	ceramic	body	4.8	plain	Xindian	medium sand	grey brown
FCN4748	42	2017	Huizuiwa	Lintao	17LH-T1-L11	H4	Ceramic sherd	ceramic	body	4.5	plain	Xindian	medium sand	orange
FCN4748	43	2017	Huizuiwa	Lintao	17LH-T1-L11	H4	Ceramic sherd	ceramic	body	3.2	plain	Xindian	medium sand	orange
FCN4748	69	2017	Huizuiwa	Lintao	17LH-T1-L11	H4	Ceramic sherd	ceramic	body	4	plain	Xindian	medium sand	orange
FCN4748	73	2017	Huizuiwa	Lintao	17LH-T1-L11	H4	Ceramic sherd	ceramic	body	3.6	plain	Xindian	medium sand	orange
FCN4748	88	2017	Huizuiwa	Lintao	17LH-T1-L11	H4	Ceramic sherd	ceramic	body	2.4	plain	Xindian	medium sand	orange
FCN4748	27	2017	Huizuiwa	Lintao	17LH-T1-L11	H4	Ceramic sherd	ceramic	body	4	plain	Xindian	fine	grey
FCN4748	48	2017	Huizuiwa	Lintao	17LH-T1-L11	H4	Ceramic sherd	ceramic	body	1.1	plain	Xindian	fine	grey
FCN4748	83	2017	Huizuiwa	Lintao	17LH-T1-L11	H4	Ceramic sherd	ceramic	body	1.3	plain	Xindian	fine	grey
FCN4748	53	2017	Huizuiwa	Lintao	17LH-T1-L11	H4	Ceramic sherd	ceramic	body	2.7	plain	Xindian	fine	grey brown
FCN4748	44	2017	Huizuiwa	Lintao	17LH-T1-L11	H4	Ceramic sherd	ceramic	body	1.3	plain	Xindian	fine	orange
FCN4748	96	2017	Huizuiwa	Lintao	17LH-T1-L11	H4	Ceramic sherd	ceramic	body	1.2	plain	Xindian	fine	orange
FCN4748	57	2017	Huizuiwa	Lintao	17LH-T1-L11	H4	Ceramic sherd	ceramic	body	1.9	plain	Xindian	fine	orange yellow
FCN4748	59	2017	Huizuiwa	Lintao	17LH-T1-L11	H4	Ceramic sherd	ceramic	body	2.7	plain	Xindian	fine	orange yellow
FCN4748	70	2017	Huizuiwa	Lintao	17LH-T1-L11	H4	Ceramic sherd	ceramic	body	1.1	plain	Xindian	fine	orange yellow
FCN4748	72	2017	Huizuiwa	Lintao	17LH-T1-L11	H4	Ceramic sherd	ceramic	body	1.4	plain	Xindian	fine	orange yellow
FCN4748	22	2017	Huizuiwa	Lintao	17LH-T1-L11	H4	Ceramic sherd	ceramic	body	3.9	plain	Xindian	fine sand	orange
FCN4748	31	2017	Huizuiwa	Lintao	17LH-T1-L11	H4	Ceramic sherd	ceramic	body	2.6	plain	Xindian	fine sand	orange
FCN4748	39	2017	Huizuiwa	Lintao	17LH-T1-L11	H4	Ceramic sherd	ceramic	body	3.9	plain	Xindian	fine sand	orange
FCN4748	40	2017	Huizuiwa	Lintao	17LH-T1-L11	H4	Ceramic sherd	ceramic	body	4.3	plain	Xindian	fine sand	orange
FCN4748	65	2017	Huizuiwa	Lintao	17LH-T1-L11	H4	Ceramic sherd	ceramic	body	3.9	plain	Xindian	fine sand	orange
FCN4748	85	2017	Huizuiwa	Lintao	17LH-T1-L11	H4	Ceramic sherd	ceramic	body	2.8	plain	Xindian	fine sand	orange
FCN4748	86	2017	Huizuiwa	Lintao	17LH-T1-L11	H4	Ceramic sherd	ceramic	body	2.6	plain	Xindian	fine sand	orange
FCN4748	89	2017	Huizuiwa	Lintao	17LH-T1-L11	H4	Ceramic sherd	ceramic	body	2.4	plain	Xindian	fine sand	orange
FCN4748	90	2017	Huizuiwa	Lintao	17LH-T1-L11	H4	Ceramic sherd	ceramic	body	1.8	plain	Xindian	fine sand	orange
FCN4748	93	2017	Huizuiwa	Lintao	17LH-T1-L11	H4	Ceramic sherd	ceramic	body	1.3	plain	Xindian	fine sand	orange
FCN4748	94	2017	Huizuiwa	Lintao	17LH-T1-L11	H4	Ceramic sherd	ceramic	body	2.5	plain	Xindian	fine sand	orange
FCN4748	97	2017	Huizuiwa	Lintao	17LH-T1-L11	H4	Ceramic sherd	ceramic	body	1.5	plain	Xindian	fine sand	orange
FCN4748	99	2017	Huizuiwa	Lintao	17LH-T1-L11	H4	Ceramic sherd	ceramic	body	1.4	plain	Xindian	fine sand	orange
FCN4748	74	2017	Huizuiwa	Lintao	17LH-T1-L11	H4	Ceramic sherd	ceramic	body	2.5	plain	Xindian	fine sand	orange yellow
FCN4748	78	2017	Huizuiwa	Lintao	17LH-T1-L11	H4	Ceramic sherd	ceramic	body	1.6	plain	Xindian	fine sand	orange yellow
FCN4748	24	2017	Huizuiwa	Lintao	17LH-T1-L11	H4	Ceramic sherd	ceramic	body	7.2	plain	Xindian	coarse sand	orange
FCN4748	29	2017	Huizuiwa	Lintao	17LH-T1-L11	H4	Ceramic sherd	ceramic	body	8.8	slip	Xindian	medium sand	orange
FCN4748	32	2017	Huizuiwa	Lintao	17LH-T1-L11	H4	Ceramic sherd	ceramic	body	9.2	slip	Xindian	medium sand	orange yellow
FCN4748	26	2017	Huizuiwa	Lintao	17LH-T1-L11	H4	Ceramic sherd	ceramic	body	5	slip	Xindian	fine sand	orange
FCN4748	68	2017	Huizuiwa	Lintao	17LH-T1-L11	H4	Ceramic sherd	ceramic	body	1.8	slip	Xindian	fine sand	orange
FCN4748	1	2017	Huizuiwa	Lintao	17LH-T1-L11	H4	Ceramic sherd	ceramic	body	123.8	slip	Xindian	coarse sand	orange
FCN4748	34	2017	Huizuiwa	Lintao	17LH-T1-L11	H4	Ceramic sherd	ceramic	body	10.6	slip	Xindian	coarse sand	orange
FCN4748	2	2017	Huizuiwa	Lintao	17LH-T1-L11	H4	Ceramic sherd	ceramic	body	27	slip	Xindian	coarse sand	orange yellow
FCN4748	15	2017	Huizuiwa	Lintao	17LH-T1-L11	H4	Ceramic sherd	ceramic	body	9	slip + black pigment	Xindian	medium sand	grey brown
FCN4748	3	2017	Huizuiwa	Lintao	17LH-T1-L11	H4	Ceramic sherd	ceramic	body	17.7	slip + black pigment	Xindian	medium sand	orange
FCN4748	37	2017	Huizuiwa	Lintao	17LH-T1-L11	H4	Ceramic sherd	ceramic	body	11.1	slip + black pigment	Xindian	medium sand	orange
FCN4748	77	2017	Huizuiwa	Lintao	17LH-T1-L11	H4	Ceramic sherd	ceramic	body	1	slip + black pigment	Xindian	fine	orange yellow
FCN4748	45	2017	Huizuiwa	Lintao	17LH-T1-L11	H4	Ceramic sherd	ceramic	body	4.3	slip + black pigment	Xindian	fine sand	grey
FCN4748	67	2017	Huizuiwa	Lintao	17LH-T1-L11	H4	Ceramic sherd	ceramic	body	3	slip + black pigment	Xindian	fine sand	orange
FCN4748	12	2017	Huizuiwa	Lintao	17LH-T1-L11	H4	Ceramic sherd	ceramic	body	2.6	slip + black pigment + red pigment	Xindian	fine	orange
FCN4748	5	2017	Huizuiwa	Lintao	17LH-T1-L11	H4	Ceramic sherd	ceramic	body	14.4	slip + red pigment	Xindian	fine sand	orange
FCN4755	23	2017	Huizuiwa	Lintao	17LH-T1-L12	H3	Ceramic sherd	ceramic	body	8.4	black pigment	Xindian	fine sand	orange
FCN4755	32	2017	Huizuiwa	Lintao	17LH-T1-L12	H3	Ceramic sherd	ceramic	body	2.6	black pigment	Xindian	fine sand	orange
FCN4755	33	2017	Huizuiwa	Lintao	17LH-T1-L12	H3	Ceramic sherd	ceramic	body	1.8	black pigment	Xindian	fine sand	orange
FCN4755	38	2017	Huizuiwa	Lintao	17LH-T1-L12	H3	Ceramic sherd	ceramic	body	2.3	black pigment	Xindian	fine sand	orange
FCN4755	46	2017	Huizuiwa	Lintao	17LH-T1-L12	H3	Ceramic sherd	ceramic	body	1.8	black pigment	Xindian	fine sand	orange
FCN4755	55	2017	Huizuiwa	Lintao	17LH-T1-L12	H3	Ceramic sherd	ceramic	body	1.2	black pigment	Xindian	fine sand	orange yellow
FCN4755	8	2017	Huizuiwa	Lintao	17LH-T1-L12	H3	Ceramic sherd	ceramic	handle	9.5	black pigment	Xindian	fine sand	orange yellow
FCN4755	1	2017	Huizuiwa	Lintao	17LH-T1-L12	H3	Ceramic sherd	ceramic	body	58.4	brown pigment	Xindian	medium sand	orange
FCN4755	48	2017	Huizuiwa	Lintao	17LH-T1-L12	H3	Ceramic sherd	ceramic	body	2	brown pigment	Xindian	fine sand	orange
FCN4755	49	2017	Huizuiwa	Lintao	17LH-T1-L12	H3	Ceramic sherd	ceramic	body	2.7	brown pigment	Xindian	fine sand	orange
FCN4755	30	2017	Huizuiwa	Lintao	17LH-T1-L12	H3	Ceramic sherd	ceramic	body	5.7	fine cordmarked	Xindian	medium sand	grey
FCN4755	2	2017	Huizuiwa	Lintao	17LH-T1-L12	H3	Ceramic sherd	ceramic	body	34.7	fine cordmarked	Xindian	medium sand	orange
FCN4755	19	2017	Huizuiwa	Lintao	17LH-T1-L12	H3	Ceramic sherd	ceramic	body	6.3	fine cordmarked	Xindian	medium sand	orange
FCN4755	42	2017	Huizuiwa	Lintao	17LH-T1-L12	H3	Ceramic sherd	ceramic	body	3.8	fine cordmarked	Xindian	medium sand	orange
FCN4755	3	2017	Huizuiwa	Lintao	17LH-T1-L12	H3	Ceramic sherd	ceramic	base	92.5	fine cordmarked	Xindian	medium sand	orange
FCN4755	27	2017	Huizuiwa	Lintao	17LH-T1-L12	H3	Ceramic sherd	ceramic	body	2.8	fine cordmarked	Xindian	fine sand	grey
FCN4755	34	2017	Huizuiwa	Lintao	17LH-T1-L12	H3	Ceramic sherd	ceramic	body	4.8	fine cordmarked	Xindian	fine sand	grey
FCN4755	39	2017	Huizuiwa	Lintao	17LH-T1-L12	H3	Ceramic sherd	ceramic	body	2.4	fine cordmarked	Xindian	fine sand	grey
FCN4755	54	2017	Huizuiwa	Lintao	17LH-T1-L12	H3	Ceramic sherd	ceramic	body	3.1	fine cordmarked	Xindian	fine sand	grey
FCN4755	24	2017	Huizuiwa	Lintao	17LH-T1-L12	H3	Ceramic sherd	ceramic	body	4.8	fine cordmarked	Xindian	fine sand	orange
FCN4755	31	2017	Huizuiwa	Lintao	17LH-T1-L12	H3	Ceramic sherd	ceramic	body	3.9	fine cordmarked	Xindian	fine sand	orange
FCN4755	35	2017	Huizuiwa	Lintao	17LH-T1-L12	H3	Ceramic sherd	ceramic	body	3	fine cordmarked	Xindian	fine sand	orange
FCN4755	36	2017	Huizuiwa	Lintao	17LH-T1-L12	H3	Ceramic sherd	ceramic	body	4.2	fine cordmarked	Xindian	fine sand	orange
FCN4755	45	2017	Huizuiwa	Lintao	17LH-T1-L12	H3	Ceramic sherd	ceramic	body	2.5	fine cordmarked	Xindian	fine sand	orange
FCN4755	52	2017	Huizuiwa	Lintao	17LH-T1-L12	H3	Ceramic sherd	ceramic	body	2.5	fine cordmarked	Xindian	fine sand	orange yellow
FCN4755	9	2017	Huizuiwa	Lintao	17LH-T1-L12	H3	Ceramic sherd	ceramic	handle	14.1	fine cordmarked	Xindian	fine sand	orange yellow
FCN4755	60	2017	Huizuiwa	Lintao	17LH-T1-L12	H3	Ceramic sherd	ceramic	body	1.3	fine cordmarked	Xindian	fine sand	yellow brown
FCN4755	11	2017	Huizuiwa	Lintao	17LH-T1-L12	H3	Ceramic sherd	ceramic	body	18.6	fine cordmarked	Xindian	coarse sand	grey
FCN4755	4	2017	Huizuiwa	Lintao	17LH-T1-L12	H3	Ceramic sherd	ceramic	handle	24.3	black pigment + fine cordmarked	Xindian	fine sand	orange
FCN4755	58	2017	Huizuiwa	Lintao	17LH-T1-L12	H3	Ceramic sherd	ceramic	body	0.9	incisions	Xindian	fine	grey brown
FCN4755	17	2017	Huizuiwa	Lintao	17LH-T1-L12	H3	Ceramic sherd	ceramic	body	11	plain	Xindian	medium sand	grey brown
FCN4755	21	2017	Huizuiwa	Lintao	17LH-T1-L12	H3	Ceramic sherd	ceramic	body	5.2	plain	Xindian	medium sand	orange
FCN4755	40	2017	Huizuiwa	Lintao	17LH-T1-L12	H3	Ceramic sherd	ceramic	body	3.9	plain	Xindian	medium sand	orange
FCN4755	47	2017	Huizuiwa	Lintao	17LH-T1-L12	H3	Ceramic sherd	ceramic	body	2	plain	Xindian	medium sand	orange
FCN4755	41	2017	Huizuiwa	Lintao	17LH-T1-L12	H3	Ceramic sherd	ceramic	body	3.3	plain	Xindian	fine	grey
FCN4755	56	2017	Huizuiwa	Lintao	17LH-T1-L12	H3	Ceramic sherd	ceramic	handle	0.8	plain	Xindian	fine	orange
FCN4755	18	2017	Huizuiwa	Lintao	17LH-T1-L12	H3	Ceramic sherd	ceramic	body	6	plain	Xindian	fine sand	grey brown
FCN4755	51	2017	Huizuiwa	Lintao	17LH-T1-L12	H3	Ceramic sherd	ceramic	body	2.6	plain	Xindian	fine sand	orange
FCN4755	57	2017	Huizuiwa	Lintao	17LH-T1-L12	H3	Ceramic sherd	ceramic	body	1.3	plain	Xindian	fine sand	orange
FCN4755	59	2017	Huizuiwa	Lintao	17LH-T1-L12	H3	Ceramic sherd	ceramic	body	1.6	plain	Xindian	fine sand	orange
FCN4755	14	2017	Huizuiwa	Lintao	17LH-T1-L12	H3	Ceramic sherd	ceramic	body	5.7	plain	Xindian	fine sand	orange yellow
FCN4755	53	2017	Huizuiwa	Lintao	17LH-T1-L12	H3	Ceramic sherd	ceramic	body	2.9	plain	Xindian	fine sand	orange yellow
FCN4755	61	2017	Huizuiwa	Lintao	17LH-T1-L12	H3	Ceramic sherd	ceramic	body	1.4	plain	Xindian	fine sand	orange yellow
FCN4755	50	2017	Huizuiwa	Lintao	17LH-T1-L12	H3	Ceramic sherd	ceramic	body	4.2	slip	Xindian	medium sand	brown
FCN4755	28	2017	Huizuiwa	Lintao	17LH-T1-L12	H3	Ceramic sherd	ceramic	body	9.2	slip	Xindian	medium sand	light brown
FCN4755	22	2017	Huizuiwa	Lintao	17LH-T1-L12	H3	Ceramic sherd	ceramic	body	9	slip	Xindian	medium sand	grey
FCN4755	29	2017	Huizuiwa	Lintao	17LH-T1-L12	H3	Ceramic sherd	ceramic	body	7.8	slip	Xindian	medium sand	grey
FCN4755	12	2017	Huizuiwa	Lintao	17LH-T1-L12	H3	Ceramic sherd	ceramic	body	11.4	slip	Xindian	medium sand	orange
FCN4755	44	2017	Huizuiwa	Lintao	17LH-T1-L12	H3	Ceramic sherd	ceramic	body	3	slip	Xindian	medium sand	orange
FCN4755	37	2017	Huizuiwa	Lintao	17LH-T1-L12	H3	Ceramic sherd	ceramic	body	6.1	slip	Xindian	medium sand	orange yellow
FCN4755	16	2017	Huizuiwa	Lintao	17LH-T1-L12	H3	Ceramic sherd	ceramic	body	6.4	slip	Xindian	fine sand	orange
FCN4755	25	2017	Huizuiwa	Lintao	17LH-T1-L12	H3	Ceramic sherd	ceramic	body	7.5	slip	Xindian	fine sand	orange
FCN4755	43	2017	Huizuiwa	Lintao	17LH-T1-L12	H3	Ceramic sherd	ceramic	body	1.6	slip	Xindian	fine sand	orange
FCN4755	5	2017	Huizuiwa	Lintao	17LH-T1-L12	H3	Ceramic sherd	ceramic	body	21	slip + black pigment	Xindian	medium sand	orange
FCN4755	13	2017	Huizuiwa	Lintao	17LH-T1-L12	H3	Ceramic sherd	ceramic	body	11.3	slip + black pigment	Xindian	medium sand	orange
FCN4755	6	2017	Huizuiwa	Lintao	17LH-T1-L12	H3	Ceramic sherd	ceramic	body	12	slip + black pigment	Xindian	fine sand	orange
FCN4755	20	2017	Huizuiwa	Lintao	17LH-T1-L12	H3	Ceramic sherd	ceramic	body	4.3	slip + black pigment	Xindian	fine sand	orange
FCN4755	26	2017	Huizuiwa	Lintao	17LH-T1-L12	H3	Ceramic sherd	ceramic	body	3.3	slip + black pigment	Xindian	fine sand	orange
FCN4755	15	2017	Huizuiwa	Lintao	17LH-T1-L12	H3	Ceramic sherd	ceramic	body	11.4	slip + black pigment	Xindian	coarse sand	grey brown
FCN4755	7	2017	Huizuiwa	Lintao	17LH-T1-L12	H3	Ceramic sherd	ceramic	body	22	slip + black pigment	Xindian	coarse sand	orange
FCN4755	10	2017	Huizuiwa	Lintao	17LH-T1-L12	H3	Ceramic sherd	ceramic	body	18.2	slip + fine cordmarked	Xindian	coarse sand	orange
FCN4259	4	2017	Huizuiwa	Lintao	17LH-T1-L13	H3	Ceramic sherd	ceramic	body	9.6	black pigment	Xindian	medium sand	orange
FCN4259	11	2017	Huizuiwa	Lintao	17LH-T1-L13	H3	Ceramic sherd	ceramic	body	0.6	black pigment	Xindian	fine sand	orange yellow
FCN4259	6	2017	Huizuiwa	Lintao	17LH-T1-L13	H3	Ceramic sherd	ceramic	body	4.3	fine cordmarked	Xindian	medium sand	orange
FCN4259	1	2017	Huizuiwa	Lintao	17LH-T1-L13	H3	Ceramic sherd	ceramic	body	20.4	fine cordmarked	Xindian	medium sand	yellow brown
FCN4259	10	2017	Huizuiwa	Lintao	17LH-T1-L13	H3	Ceramic sherd	ceramic	body	2.7	plain	Xindian	medium sand	grey
FCN4259	13	2017	Huizuiwa	Lintao	17LH-T1-L13	H3	Ceramic sherd	ceramic	body	1.2	plain	Xindian	medium sand	grey
FCN4259	5	2017	Huizuiwa	Lintao	17LH-T1-L13	H3	Ceramic sherd	ceramic	body	5.5	plain	Xindian	medium sand	yellow brown
FCN4259	12	2017	Huizuiwa	Lintao	17LH-T1-L13	H3	Ceramic sherd	ceramic	body	0.4	plain	Xindian	fine	orange yellow
FCN4259	14	2017	Huizuiwa	Lintao	17LH-T1-L13	H3	Ceramic sherd	ceramic	body	0.7	plain	Xindian	fine	orange yellow
FCN4259	3	2017	Huizuiwa	Lintao	17LH-T1-L13	H3	Ceramic sherd	ceramic	body	12	plain	Xindian	fine sand	orange
FCN4259	9	2017	Huizuiwa	Lintao	17LH-T1-L13	H3	Ceramic sherd	ceramic	body	2.7	plain	Xindian	fine sand	orange
FCN4259	8	2017	Huizuiwa	Lintao	17LH-T1-L13	H3	Ceramic sherd	ceramic	body	1.6	slip	Xindian	fine	grey
FCN4259	7	2017	Huizuiwa	Lintao	17LH-T1-L13	H3	Ceramic sherd	ceramic	body	1.7	slip	Xindian	fine	orange
FCN4259	2	2017	Huizuiwa	Lintao	17LH-T1-L13	H3	Ceramic sherd	ceramic	body	19	slip + black pigment	Xindian	medium sand	orange
FCN4764	68	2017	Huizuiwa	Lintao	17LH-T1-L14	Layer 4	Ceramic sherd	ceramic	body	9.3	1B	Xindian	coarse sand	grey
FCN4764	127	2017	Huizuiwa	Lintao	17LH-T1-L14	Layer 4	Ceramic sherd	ceramic	body	16.3	appliqué	Xindian	fine sand	grey
FCN4764	129	2017	Huizuiwa	Lintao	17LH-T1-L14	Layer 4	Ceramic sherd	ceramic	body	2.8	appliqué	Xindian	fine sand	orange yellow
FCN4764	44	2017	Huizuiwa	Lintao	17LH-T1-L14	Layer 4	Ceramic sherd	ceramic	body	8.4	black pigment	Xindian	medium sand	orange
FCN4764	165	2017	Huizuiwa	Lintao	17LH-T1-L14	Layer 4	Ceramic sherd	ceramic	body	4.4	black pigment	Xindian	medium sand	orange (grey core)
FCN4764	166	2017	Huizuiwa	Lintao	17LH-T1-L14	Layer 4	Ceramic sherd	ceramic	body	5.4	black pigment	Xindian	medium sand	orange (grey core)
FCN4764	107	2017	Huizuiwa	Lintao	17LH-T1-L14	Layer 4	Ceramic sherd	ceramic	body	1.3	black pigment	Xindian	fine	grey
FCN4764	120	2017	Huizuiwa	Lintao	17LH-T1-L14	Layer 4	Ceramic sherd	ceramic	body	2.5	black pigment	Xindian	fine	grey
FCN4764	201	2017	Huizuiwa	Lintao	17LH-T1-L14	Layer 4	Ceramic sherd	ceramic	body	0.6	black pigment	Xindian	fine	grey brown
FCN4764	12	2017	Huizuiwa	Lintao	17LH-T1-L14	Layer 4	Ceramic sherd	ceramic	body	2.6	black pigment	Xindian	fine	orange
FCN4764	102	2017	Huizuiwa	Lintao	17LH-T1-L14	Layer 4	Ceramic sherd	ceramic	body	2.2	black pigment	Xindian	fine	orange
FCN4764	134	2017	Huizuiwa	Lintao	17LH-T1-L14	Layer 4	Ceramic sherd	ceramic	body	2.6	black pigment	Xindian	fine	orange
FCN4764	21	2017	Huizuiwa	Lintao	17LH-T1-L14	Layer 4	Ceramic sherd	ceramic	body	2.1	black pigment	Xindian	fine sand	light brown (grey core)
FCN4764	75	2017	Huizuiwa	Lintao	17LH-T1-L14	Layer 4	Ceramic sherd	ceramic	body	13.2	black pigment	Xindian	fine sand	orange
FCN4764	178	2017	Huizuiwa	Lintao	17LH-T1-L14	Layer 4	Ceramic sherd	ceramic	body	2.1	black pigment	Xindian	fine sand	orange
FCN4764	147	2017	Huizuiwa	Lintao	17LH-T1-L14	Layer 4	Ceramic sherd	ceramic	body	1.2	black pigment	Xindian	fine sand	orange
FCN4764	152	2017	Huizuiwa	Lintao	17LH-T1-L14	Layer 4	Ceramic sherd	ceramic	body	1.3	black pigment	Xindian	fine sand	orange (brown)
FCN4764	20	2017	Huizuiwa	Lintao	17LH-T1-L14	Layer 4	Ceramic sherd	ceramic	body	0.6	black pigment	Xindian	fine sand	orange (grey core)
FCN4764	61	2017	Huizuiwa	Lintao	17LH-T1-L14	Layer 4	Ceramic sherd	ceramic	body	6	black pigment	Xindian	fine sand	orange (grey core)
FCN4764	189	2017	Huizuiwa	Lintao	17LH-T1-L14	Layer 4	Ceramic sherd	ceramic	body	1.4	black pigment	Xindian	fine sand	orange (grey core)
FCN4764	194	2017	Huizuiwa	Lintao	17LH-T1-L14	Layer 4	Ceramic sherd	ceramic	body	1.1	black pigment	Xindian	fine sand	orange (grey core)
FCN4764	45	2017	Huizuiwa	Lintao	17LH-T1-L14	Layer 4	Ceramic sherd	ceramic	body	12.6	black pigment	Xindian	coarse sand	grey brown
FCN4764	39	2017	Huizuiwa	Lintao	17LH-T1-L14	Layer 4	Ceramic sherd	ceramic	body	12.2	black pigment	Xindian	coarse sand	orange
FCN4764	46	2017	Huizuiwa	Lintao	17LH-T1-L14	Layer 4	Ceramic sherd	ceramic	body	27	black pigment	Xindian	coarse sand	orange
FCN4764	132	2017	Huizuiwa	Lintao	17LH-T1-L14	Layer 4	Ceramic sherd	ceramic	body	3.4	black pigment	Xindian	coarse sand	orange
FCN4764	141	2017	Huizuiwa	Lintao	17LH-T1-L14	Layer 4	Ceramic sherd	ceramic	body	8.1	black pigment	Xindian	coarse sand	orange
FCN4764	57	2017	Huizuiwa	Lintao	17LH-T1-L14	Layer 4	Ceramic sherd	ceramic	body	9.5	black pigment	Xindian	coarse sand	orange (grey core)
FCN4764	47	2017	Huizuiwa	Lintao	17LH-T1-L14	Layer 4	Ceramic sherd	ceramic	body	39.5	black pigment + appliqué	Xindian	coarse sand	orange yellow (grey)
FCN4764	66	2017	Huizuiwa	Lintao	17LH-T1-L14	Layer 4	Ceramic sherd	ceramic	body	6.9	black pigment + fine cordmarked	Xindian	medium sand	orange (grey core)
FCN4764	9	2017	Huizuiwa	Lintao	17LH-T1-L14	Layer 4	Ceramic sherd	ceramic	body	3.9	black pigment + fine cordmarked	Xindian	fine	orange
FCN4764	100	2017	Huizuiwa	Lintao	17LH-T1-L14	Layer 4	Ceramic sherd	ceramic	body	4.7	black pigment + fine cordmarked	Xindian	fine sand	grey
FCN4764	74	2017	Huizuiwa	Lintao	17LH-T1-L14	Layer 4	Ceramic sherd	ceramic	body	7.5	black pigment + fine cordmarked	Xindian	fine sand	orange
FCN4764	48	2017	Huizuiwa	Lintao	17LH-T1-L14	Layer 4	Ceramic sherd	ceramic	handle	31.8	black pigment + red pigment	Xindian	medium sand	orange (grey core)
FCN4764	58	2017	Huizuiwa	Lintao	17LH-T1-L14	Layer 4	Ceramic sherd	ceramic	body	2.9	black pigment + red pigment	Xindian	fine	light brown
FCN4764	128	2017	Huizuiwa	Lintao	17LH-T1-L14	Layer 4	Ceramic sherd	ceramic	body	4.6	black pigment + red pigment	Xindian	fine sand	orange yellow
FCN4764	94	2017	Huizuiwa	Lintao	17LH-T1-L14	Layer 4	Ceramic sherd	ceramic	handle	5	black pigment + red pigment + white pigment	Xindian	fine	orange (grey core)
FCN4764	22	2017	Huizuiwa	Lintao	17LH-T1-L14	Layer 4	Ceramic sherd	ceramic	body	5.4	black pigment + white pigment	Xindian	fine	grey
FCN4764	169	2017	Huizuiwa	Lintao	17LH-T1-L14	Layer 4	Ceramic sherd	ceramic	body	3.7	black pigment + white pigment	Xindian	fine	grey
FCN4764	8	2017	Huizuiwa	Lintao	17LH-T1-L14	Layer 4	Ceramic sherd	ceramic	body	5.8	black pigment + white pigment	Xindian	fine	orange (grey core)
FCN4764	16	2017	Huizuiwa	Lintao	17LH-T1-L14	Layer 4	Ceramic sherd	ceramic	body	1.7	black pigment + white pigment	Xindian	fine sand	light brown (grey core)
FCN4764	153	2017	Huizuiwa	Lintao	17LH-T1-L14	Layer 4	Ceramic sherd	ceramic	body	3	black pigment + white pigment	Xindian	fine sand	grey
FCN4764	19	2017	Huizuiwa	Lintao	17LH-T1-L14	Layer 4	Ceramic sherd	ceramic	body	1.2	black pigment + white pigment	Xindian	fine sand	orange (grey core)
FCN4764	14	2017	Huizuiwa	Lintao	17LH-T1-L14	Layer 4	Ceramic sherd	ceramic	body	4.3	black pigment + white pigment	Xindian	coarse sand	grey
FCN4764	56	2017	Huizuiwa	Lintao	17LH-T1-L14	Layer 4	Ceramic sherd	ceramic	body	15.9	black pigment + white pigment	Xindian	coarse sand	grey (orange core)
FCN4764	135	2017	Huizuiwa	Lintao	17LH-T1-L14	Layer 4	Ceramic sherd	ceramic	body	3.8	black pigment + white pigment	Xindian	coarse sand	orange
FCN4764	25	2017	Huizuiwa	Lintao	17LH-T1-L14	Layer 4	Ceramic sherd	ceramic	body	126.6	black pigment + white pigment	Xindian	coarse sand	orange (grey core)
FCN4764	159	2017	Huizuiwa	Lintao	17LH-T1-L14	Layer 4	Ceramic sherd	ceramic	body	2.3	black pigment + white pigment + fine cordmarked	Xindian	fine sand	orange
FCN4764	140	2017	Huizuiwa	Lintao	17LH-T1-L14	Layer 4	Ceramic sherd	ceramic	body	5.2	fine cordmarked	Xindian	medium sand	grey (brown core)
FCN4764	131	2017	Huizuiwa	Lintao	17LH-T1-L14	Layer 4	Ceramic sherd	ceramic	body	8.4	fine cordmarked	Xindian	medium sand	grey
FCN4764	27	2017	Huizuiwa	Lintao	17LH-T1-L14	Layer 4	Ceramic sherd	ceramic	body	34.1	fine cordmarked	Xindian	medium sand	orange
FCN4764	28	2017	Huizuiwa	Lintao	17LH-T1-L14	Layer 4	Ceramic sherd	ceramic	body	17.4	fine cordmarked	Xindian	medium sand	orange
FCN4764	126	2017	Huizuiwa	Lintao	17LH-T1-L14	Layer 4	Ceramic sherd	ceramic	body	19.8	fine cordmarked	Xindian	medium sand	orange
FCN4764	155	2017	Huizuiwa	Lintao	17LH-T1-L14	Layer 4	Ceramic sherd	ceramic	body	5.1	fine cordmarked	Xindian	medium sand	orange
FCN4764	69	2017	Huizuiwa	Lintao	17LH-T1-L14	Layer 4	Ceramic sherd	ceramic	body	13	fine cordmarked	Xindian	medium sand	orange (grey core)
FCN4764	118	2017	Huizuiwa	Lintao	17LH-T1-L14	Layer 4	Ceramic sherd	ceramic	body	3.9	fine cordmarked	Xindian	medium sand	orange (grey core)
FCN4764	148	2017	Huizuiwa	Lintao	17LH-T1-L14	Layer 4	Ceramic sherd	ceramic	foot	11	fine cordmarked	Xindian	medium sand	orange (grey core)
FCN4764	170	2017	Huizuiwa	Lintao	17LH-T1-L14	Layer 4	Ceramic sherd	ceramic	body	2.1	fine cordmarked	Xindian	medium sand
FCN4764	85	2017	Huizuiwa	Lintao	17LH-T1-L14	Layer 4	Ceramic sherd	ceramic	body	4.4	fine cordmarked	Xindian	fine	light brown
FCN4764	79	2017	Huizuiwa	Lintao	17LH-T1-L14	Layer 4	Ceramic sherd	ceramic	body	3.5	fine cordmarked	Xindian	fine	grey
FCN4764	176	2017	Huizuiwa	Lintao	17LH-T1-L14	Layer 4	Ceramic sherd	ceramic	body	3.7	fine cordmarked	Xindian	fine	grey
FCN4764	30	2017	Huizuiwa	Lintao	17LH-T1-L14	Layer 4	Ceramic sherd	ceramic	body	12	fine cordmarked	Xindian	fine	grey (orange core)
FCN4764	83	2017	Huizuiwa	Lintao	17LH-T1-L14	Layer 4	Ceramic sherd	ceramic	body	2.8	fine cordmarked	Xindian	fine	grey (orange core)
FCN4764	72	2017	Huizuiwa	Lintao	17LH-T1-L14	Layer 4	Ceramic sherd	ceramic	body	3.6	fine cordmarked	Xindian	fine	orange
FCN4764	113	2017	Huizuiwa	Lintao	17LH-T1-L14	Layer 4	Ceramic sherd	ceramic	body	1.1	fine cordmarked	Xindian	fine	orange
FCN4764	84	2017	Huizuiwa	Lintao	17LH-T1-L14	Layer 4	Ceramic sherd	ceramic	body	3.4	fine cordmarked	Xindian	fine sand	light brown
FCN4764	202	2017	Huizuiwa	Lintao	17LH-T1-L14	Layer 4	Ceramic sherd	ceramic	body	0.6	fine cordmarked	Xindian	fine sand	light brown
FCN4764	71	2017	Huizuiwa	Lintao	17LH-T1-L14	Layer 4	Ceramic sherd	ceramic	body	3.7	fine cordmarked	Xindian	fine sand	light brown (grey core)
FCN4764	29	2017	Huizuiwa	Lintao	17LH-T1-L14	Layer 4	Ceramic sherd	ceramic	base	22.7	fine cordmarked	Xindian	fine sand	light brown (grey core)
FCN4764	34	2017	Huizuiwa	Lintao	17LH-T1-L14	Layer 4	Ceramic sherd	ceramic	body	9	fine cordmarked	Xindian	fine sand	grey
FCN4764	78	2017	Huizuiwa	Lintao	17LH-T1-L14	Layer 4	Ceramic sherd	ceramic	body	9	fine cordmarked	Xindian	fine sand	grey
FCN4764	99	2017	Huizuiwa	Lintao	17LH-T1-L14	Layer 4	Ceramic sherd	ceramic	body	4.2	fine cordmarked	Xindian	fine sand	grey
FCN4764	38	2017	Huizuiwa	Lintao	17LH-T1-L14	Layer 4	Ceramic sherd	ceramic	body	17	fine cordmarked	Xindian	fine sand	grey (orange core)
FCN4764	64	2017	Huizuiwa	Lintao	17LH-T1-L14	Layer 4	Ceramic sherd	ceramic	body	9.6	fine cordmarked	Xindian	fine sand	grey (orange core)
FCN4764	179	2017	Huizuiwa	Lintao	17LH-T1-L14	Layer 4	Ceramic sherd	ceramic	body	3.2	fine cordmarked	Xindian	fine sand	grey (orange core)
FCN4764	185	2017	Huizuiwa	Lintao	17LH-T1-L14	Layer 4	Ceramic sherd	ceramic	body	3.2	fine cordmarked	Xindian	fine sand	grey (orange core)
FCN4764	89	2017	Huizuiwa	Lintao	17LH-T1-L14	Layer 4	Ceramic sherd	ceramic	body	1.9	fine cordmarked	Xindian	fine sand	grey brown
FCN4764	103	2017	Huizuiwa	Lintao	17LH-T1-L14	Layer 4	Ceramic sherd	ceramic	body	2.6	fine cordmarked	Xindian	fine sand	grey brown
FCN4764	116	2017	Huizuiwa	Lintao	17LH-T1-L14	Layer 4	Ceramic sherd	ceramic	body	1.6	fine cordmarked	Xindian	fine sand	grey brown
FCN4764	136	2017	Huizuiwa	Lintao	17LH-T1-L14	Layer 4	Ceramic sherd	ceramic	body	6.2	fine cordmarked	Xindian	fine sand	orange
FCN4764	156	2017	Huizuiwa	Lintao	17LH-T1-L14	Layer 4	Ceramic sherd	ceramic	body	2.5	fine cordmarked	Xindian	fine sand	orange
FCN4764	173	2017	Huizuiwa	Lintao	17LH-T1-L14	Layer 4	Ceramic sherd	ceramic	body	2	fine cordmarked	Xindian	fine sand	orange
FCN4764	117	2017	Huizuiwa	Lintao	17LH-T1-L14	Layer 4	Ceramic sherd	ceramic	body	1.6	fine cordmarked	Xindian	fine sand	orange (grey core)
FCN4764	123	2017	Huizuiwa	Lintao	17LH-T1-L14	Layer 4	Ceramic sherd	ceramic	body	7.1	fine cordmarked	Xindian	fine sand	orange (grey core)
FCN4764	137	2017	Huizuiwa	Lintao	17LH-T1-L14	Layer 4	Ceramic sherd	ceramic	body	3.6	fine cordmarked	Xindian	fine sand	orange (grey core)
FCN4764	174	2017	Huizuiwa	Lintao	17LH-T1-L14	Layer 4	Ceramic sherd	ceramic	body	2.3	fine cordmarked	Xindian	fine sand	orange (grey core)
FCN4764	177	2017	Huizuiwa	Lintao	17LH-T1-L14	Layer 4	Ceramic sherd	ceramic	body	4.1	fine cordmarked	Xindian	fine sand	orange (grey core)
FCN4764	70	2017	Huizuiwa	Lintao	17LH-T1-L14	Layer 4	Ceramic sherd	ceramic	body	14.1	fine cordmarked	Xindian	fine sand	orange (grey core)
FCN4764	23	2017	Huizuiwa	Lintao	17LH-T1-L14	Layer 4	Ceramic sherd	ceramic	base	39.8	fine cordmarked	Xindian	fine sand	orange (grey core)
FCN4764	146	2017	Huizuiwa	Lintao	17LH-T1-L14	Layer 4	Ceramic sherd	ceramic	body	2.6	fine cordmarked	Xindian	coarse sand	light brown
FCN4764	207	2017	Huizuiwa	Lintao	17LH-T1-L14	Layer 4	Ceramic sherd	ceramic	body	3.8	fine cordmarked	Xindian	coarse sand	light brown
FCN4764	76	2017	Huizuiwa	Lintao	17LH-T1-L14	Layer 4	Ceramic sherd	ceramic	body	35.7	fine cordmarked	Xindian	coarse sand	grey
FCN4764	67	2017	Huizuiwa	Lintao	17LH-T1-L14	Layer 4	Ceramic sherd	ceramic	body	5.4	fine cordmarked	Xindian	coarse sand	grey
FCN4764	130	2017	Huizuiwa	Lintao	17LH-T1-L14	Layer 4	Ceramic sherd	ceramic	body	4.5	fine cordmarked	Xindian	coarse sand	grey (orange core)
FCN4764	49	2017	Huizuiwa	Lintao	17LH-T1-L14	Layer 4	Ceramic sherd	ceramic	body	8.6	fine cordmarked	Xindian	coarse sand	grey (orange core)
FCN4764	26	2017	Huizuiwa	Lintao	17LH-T1-L14	Layer 4	Ceramic sherd	ceramic	body	85	fine cordmarked	Xindian	coarse sand	orange
FCN4764	59	2017	Huizuiwa	Lintao	17LH-T1-L14	Layer 4	Ceramic sherd	ceramic	body	7.4	fine cordmarked	Xindian	coarse sand	orange
FCN4764	87	2017	Huizuiwa	Lintao	17LH-T1-L14	Layer 4	Ceramic sherd	ceramic	body	13.7	fine cordmarked	Xindian	coarse sand	orange (grey core)
FCN4764	43	2017	Huizuiwa	Lintao	17LH-T1-L14	Layer 4	Ceramic sherd	ceramic	body	15.8	fine cordmarked	Xindian	coarse sand	orange (grey core)
FCN4764	62	2017	Huizuiwa	Lintao	17LH-T1-L14	Layer 4	Ceramic sherd	ceramic	body	4.7	fine cordmarked	Xindian	coarse sand	orange (grey core)
FCN4764	41	2017	Huizuiwa	Lintao	17LH-T1-L14	Layer 4	Ceramic sherd	ceramic	foot	17.9	fine cordmarked	Xindian	coarse sand	red brown
FCN4764	50	2017	Huizuiwa	Lintao	17LH-T1-L14	Layer 4	Ceramic sherd	ceramic	body	15.6	fine cordmarked + appliqué	Xindian	medium sand	grey (orange core)
FCN4764	24	2017	Huizuiwa	Lintao	17LH-T1-L14	Layer 4	Ceramic sherd	ceramic	neck	35.8	fine cordmarked + appliqué	Xindian	medium sand	light brown (grey core)
FCN4764	163	2017	Huizuiwa	Lintao	17LH-T1-L14	Layer 4	Ceramic sherd	ceramic	body	3	black pigment + fine cordmarked	Xindian	coarse sand	grey
FCN4764	40	2017	Huizuiwa	Lintao	17LH-T1-L14	Layer 4	Ceramic sherd	ceramic	body	18	slip + fine cordmarked	Xindian	fine	light brown
FCN4764	92	2017	Huizuiwa	Lintao	17LH-T1-L14	Layer 4	Ceramic sherd	ceramic	body	2.8	slip + fine cordmarked	Xindian	fine	orange (grey core)
FCN4764	172	2017	Huizuiwa	Lintao	17LH-T1-L14	Layer 4	Ceramic sherd	ceramic	body	4.7	incisions	Xindian	medium sand	grey
FCN4764	203	2017	Huizuiwa	Lintao	17LH-T1-L14	Layer 4	Ceramic sherd	ceramic	body	2.8	incisions	Xindian	coarse sand	grey
FCN4764	192	2017	Huizuiwa	Lintao	17LH-T1-L14	Layer 4	Ceramic sherd	ceramic	body	2	plain	Xindian	medium sand	light brown
FCN4764	53	2017	Huizuiwa	Lintao	17LH-T1-L14	Layer 4	Ceramic sherd	ceramic	body	48.9	plain	Xindian	medium sand	grey (brown core)
FCN4764	63	2017	Huizuiwa	Lintao	17LH-T1-L14	Layer 4	Ceramic sherd	ceramic	body	20	plain	Xindian	medium sand	grey (brown core)
FCN4764	104	2017	Huizuiwa	Lintao	17LH-T1-L14	Layer 4	Ceramic sherd	ceramic	body	2.4	plain	Xindian	medium sand	grey brown
FCN4764	105	2017	Huizuiwa	Lintao	17LH-T1-L14	Layer 4	Ceramic sherd	ceramic	body	5.6	plain	Xindian	medium sand	grey brown
FCN4764	200	2017	Huizuiwa	Lintao	17LH-T1-L14	Layer 4	Ceramic sherd	ceramic	body	1.3	plain	Xindian	medium sand	grey brown
FCN4764	121	2017	Huizuiwa	Lintao	17LH-T1-L14	Layer 4	Ceramic sherd	ceramic	body	2.1	plain	Xindian	fine	light brown
FCN4764	150	2017	Huizuiwa	Lintao	17LH-T1-L14	Layer 4	Ceramic sherd	ceramic	body	1.2	plain	Xindian	fine	light brown
FCN4764	190	2017	Huizuiwa	Lintao	17LH-T1-L14	Layer 4	Ceramic sherd	ceramic	body	0.9	plain	Xindian	fine	light brown
FCN4764	199	2017	Huizuiwa	Lintao	17LH-T1-L14	Layer 4	Ceramic sherd	ceramic	body	1.4	plain	Xindian	fine	grey
FCN4764	86	2017	Huizuiwa	Lintao	17LH-T1-L14	Layer 4	Ceramic sherd	ceramic	body	2.8	plain	Xindian	fine	grey
FCN4764	115	2017	Huizuiwa	Lintao	17LH-T1-L14	Layer 4	Ceramic sherd	ceramic	body	1.9	plain	Xindian	fine	grey
FCN4764	124	2017	Huizuiwa	Lintao	17LH-T1-L14	Layer 4	Ceramic sherd	ceramic	body	3.9	plain	Xindian	fine	grey
FCN4764	180	2017	Huizuiwa	Lintao	17LH-T1-L14	Layer 4	Ceramic sherd	ceramic	body	0.9	plain	Xindian	fine	grey
FCN4764	142	2017	Huizuiwa	Lintao	17LH-T1-L14	Layer 4	Ceramic sherd	ceramic	body	2.8	plain	Xindian	fine	grey (orange core)
FCN4764	108	2017	Huizuiwa	Lintao	17LH-T1-L14	Layer 4	Ceramic sherd	ceramic	body	2.3	plain	Xindian	fine	grey brown
FCN4764	151	2017	Huizuiwa	Lintao	17LH-T1-L14	Layer 4	Ceramic sherd	ceramic	body	1.9	plain	Xindian	fine	grey brown
FCN4764	55	2017	Huizuiwa	Lintao	17LH-T1-L14	Layer 4	Ceramic sherd	ceramic	body	10.3	plain	Xindian	fine	grey brown (orange)
FCN4764	93	2017	Huizuiwa	Lintao	17LH-T1-L14	Layer 4	Ceramic sherd	ceramic	body	3.3	plain	Xindian	fine	orange
FCN4764	204	2017	Huizuiwa	Lintao	17LH-T1-L14	Layer 4	Ceramic sherd	ceramic	body	3.7	plain	Xindian	fine	orange
FCN4764	81	2017	Huizuiwa	Lintao	17LH-T1-L14	Layer 4	Ceramic sherd	ceramic	body	2.8	plain	Xindian	fine	orange (brown)
FCN4764	133	2017	Huizuiwa	Lintao	17LH-T1-L14	Layer 4	Ceramic sherd	ceramic	body	1.6	plain	Xindian	fine	orange (grey core)
FCN4764	196	2017	Huizuiwa	Lintao	17LH-T1-L14	Layer 4	Ceramic sherd	ceramic	body	1.3	plain	Xindian	fine	orange (grey core)
FCN4764	197	2017	Huizuiwa	Lintao	17LH-T1-L14	Layer 4	Ceramic sherd	ceramic	body	1.4	plain	Xindian	fine	orange (grey core)
FCN4764	97	2017	Huizuiwa	Lintao	17LH-T1-L14	Layer 4	Ceramic sherd	ceramic	body	1.6	plain	Xindian	fine	orange (grey core)
FCN4764	119	2017	Huizuiwa	Lintao	17LH-T1-L14	Layer 4	Ceramic sherd	ceramic	body	2.7	plain	Xindian	fine sand	light brown
FCN4764	77	2017	Huizuiwa	Lintao	17LH-T1-L14	Layer 4	Ceramic sherd	ceramic	body	3.8	plain	Xindian	fine sand	light brown (grey core)
FCN4764	110	2017	Huizuiwa	Lintao	17LH-T1-L14	Layer 4	Ceramic sherd	ceramic	body	3.5	plain	Xindian	fine sand	light brown (grey core)
FCN4764	198	2017	Huizuiwa	Lintao	17LH-T1-L14	Layer 4	Ceramic sherd	ceramic	body	0.8	plain	Xindian	fine sand	grey
FCN4764	52	2017	Huizuiwa	Lintao	17LH-T1-L14	Layer 4	Ceramic sherd	ceramic	body	28.4	plain	Xindian	fine sand	grey (brown core)
FCN4764	101	2017	Huizuiwa	Lintao	17LH-T1-L14	Layer 4	Ceramic sherd	ceramic	body	2.1	plain	Xindian	fine sand	grey
FCN4764	181	2017	Huizuiwa	Lintao	17LH-T1-L14	Layer 4	Ceramic sherd	ceramic	body	2.2	plain	Xindian	fine sand	grey
FCN4764	182	2017	Huizuiwa	Lintao	17LH-T1-L14	Layer 4	Ceramic sherd	ceramic	body	1.3	plain	Xindian	fine sand	grey
FCN4764	183	2017	Huizuiwa	Lintao	17LH-T1-L14	Layer 4	Ceramic sherd	ceramic	body	1.4	plain	Xindian	fine sand	grey
FCN4764	184	2017	Huizuiwa	Lintao	17LH-T1-L14	Layer 4	Ceramic sherd	ceramic	body	1.7	plain	Xindian	fine sand	grey
FCN4764	188	2017	Huizuiwa	Lintao	17LH-T1-L14	Layer 4	Ceramic sherd	ceramic	body	1.6	plain	Xindian	fine sand	grey
FCN4764	35	2017	Huizuiwa	Lintao	17LH-T1-L14	Layer 4	Ceramic sherd	ceramic	foot	11.4	plain	Xindian	fine sand	grey
FCN4764	114	2017	Huizuiwa	Lintao	17LH-T1-L14	Layer 4	Ceramic sherd	ceramic	body	6.2	plain	Xindian	fine sand	grey (orange core)
FCN4764	186	2017	Huizuiwa	Lintao	17LH-T1-L14	Layer 4	Ceramic sherd	ceramic	body	2.1	plain	Xindian	fine sand	grey (orange core)
FCN4764	111	2017	Huizuiwa	Lintao	17LH-T1-L14	Layer 4	Ceramic sherd	ceramic	body	3.6	plain	Xindian	fine sand	grey brown
FCN4764	51	2017	Huizuiwa	Lintao	17LH-T1-L14	Layer 4	Ceramic sherd	ceramic	handle	6.8	plain	Xindian	fine sand	grey brown
FCN4764	122	2017	Huizuiwa	Lintao	17LH-T1-L14	Layer 4	Ceramic sherd	ceramic	handle	6.7	plain	Xindian	fine sand	orange
FCN4764	125	2017	Huizuiwa	Lintao	17LH-T1-L14	Layer 4	Ceramic sherd	ceramic	body	1.8	plain	Xindian	fine sand	orange (brown)
FCN4764	82	2017	Huizuiwa	Lintao	17LH-T1-L14	Layer 4	Ceramic sherd	ceramic	body	2.7	plain	Xindian	fine sand	orange (grey core)
FCN4764	98	2017	Huizuiwa	Lintao	17LH-T1-L14	Layer 4	Ceramic sherd	ceramic	body	4.8	plain	Xindian	fine sand	orange (grey core)
FCN4764	167	2017	Huizuiwa	Lintao	17LH-T1-L14	Layer 4	Ceramic sherd	ceramic	body	4.6	plain	Xindian	fine sand	orange (grey core)
FCN4764	187	2017	Huizuiwa	Lintao	17LH-T1-L14	Layer 4	Ceramic sherd	ceramic	body	2.8	plain	Xindian	fine sand	orange (grey core)
FCN4764	139	2017	Huizuiwa	Lintao	17LH-T1-L14	Layer 4	Ceramic sherd	ceramic	handle	6.7	plain	Xindian	fine sand	orange (grey core)
FCN4764	154	2017	Huizuiwa	Lintao	17LH-T1-L14	Layer 4	Ceramic sherd	ceramic	handle	7.9	plain	Xindian	fine sand	orange (grey core)
FCN4764	195	2017	Huizuiwa	Lintao	17LH-T1-L14	Layer 4	Ceramic sherd	ceramic	body	1.4	plain	Xindian	coarse sand	light brown (grey core)
FCN4764	191	2017	Huizuiwa	Lintao	17LH-T1-L14	Layer 4	Ceramic sherd	ceramic	body	2.3	plain	Xindian	coarse sand	grey
FCN4764	37	2017	Huizuiwa	Lintao	17LH-T1-L14	Layer 4	Ceramic sherd	ceramic	body	10.9	plain	Xindian	coarse sand	grey (orange core)
FCN4764	65	2017	Huizuiwa	Lintao	17LH-T1-L14	Layer 4	Ceramic sherd	ceramic	body	9	plain	Xindian	coarse sand	grey (orange core)
FCN4764	149	2017	Huizuiwa	Lintao	17LH-T1-L14	Layer 4	Ceramic sherd	ceramic	body	6.8	plain	Xindian	coarse sand	grey (orange core)
FCN4764	161	2017	Huizuiwa	Lintao	17LH-T1-L14	Layer 4	Ceramic sherd	ceramic	body	5.4	plain	Xindian	coarse sand	grey (orange core)
FCN4764	88	2017	Huizuiwa	Lintao	17LH-T1-L14	Layer 4	Ceramic sherd	ceramic	body	6.7	plain	Xindian	coarse sand	grey (red brown core)
FCN4764	60	2017	Huizuiwa	Lintao	17LH-T1-L14	Layer 4	Ceramic sherd	ceramic	body	11.9	plain	Xindian	coarse sand	orange (grey core)
FCN4764	158	2017	Huizuiwa	Lintao	17LH-T1-L14	Layer 4	Ceramic sherd	ceramic	body	6.9	plain	Xindian	coarse sand	orange (grey core)
FCN4764	54	2017	Huizuiwa	Lintao	17LH-T1-L14	Layer 4	Ceramic sherd	ceramic	handle	22.2	plain	Xindian	coarse sand	orange (grey core)
FCN4764	145	2017	Huizuiwa	Lintao	17LH-T1-L14	Layer 4	Ceramic sherd	ceramic	body	6.7	plain	Xindian	coarse sand	red (grey)
FCN4764	162	2017	Huizuiwa	Lintao	17LH-T1-L14	Layer 4	Ceramic sherd	ceramic	body	4.2	polish	Xindian	medium sand	orange (grey core)
FCN4764	80	2017	Huizuiwa	Lintao	17LH-T1-L14	Layer 4	Ceramic sherd	ceramic	body	6	polish	Xindian	fine	orange
FCN4764	144	2017	Huizuiwa	Lintao	17LH-T1-L14	Layer 4	Ceramic sherd	ceramic	handle	5.3	polish	Xindian	fine	orange yellow
FCN4764	157	2017	Huizuiwa	Lintao	17LH-T1-L14	Layer 4	Ceramic sherd	ceramic	body	5.6	polish	Xindian	fine sand	orange yellow
FCN4764	160	2017	Huizuiwa	Lintao	17LH-T1-L14	Layer 4	Ceramic sherd	ceramic	body	3.3	polish	Xindian	fine sand	orange yellow
FCN4764	138	2017	Huizuiwa	Lintao	17LH-T1-L14	Layer 4	Ceramic sherd	ceramic	body	14	polish	Xindian	coarse sand	grey
FCN4764	106	2017	Huizuiwa	Lintao	17LH-T1-L14	Layer 4	Ceramic sherd	ceramic	body	1.4	red pigment	Xindian	fine	orange (grey core)
FCN4764	109	2017	Huizuiwa	Lintao	17LH-T1-L14	Layer 4	Ceramic sherd	ceramic	body	3.6	slip	Xindian	fine	orange
FCN4764	175	2017	Huizuiwa	Lintao	17LH-T1-L14	Layer 4	Ceramic sherd	ceramic	body	1.7	slip	Xindian	fine sand	orange (grey core)
FCN4764	206	2017	Huizuiwa	Lintao	17LH-T1-L14	Layer 4	Ceramic sherd	ceramic	body	7	slip + black pigment	Xindian	medium sand	grey brown
FCN4764	15	2017	Huizuiwa	Lintao	17LH-T1-L14	Layer 4	Ceramic sherd	ceramic	body	3.5	slip + black pigment	Xindian	fine	grey
FCN4764	171	2017	Huizuiwa	Lintao	17LH-T1-L14	Layer 4	Ceramic sherd	ceramic	body	1.1	slip + black pigment	Xindian	fine	grey
FCN4764	193	2017	Huizuiwa	Lintao	17LH-T1-L14	Layer 4	Ceramic sherd	ceramic	body	1.4	slip + black pigment	Xindian	fine	grey
FCN4764	95	2017	Huizuiwa	Lintao	17LH-T1-L14	Layer 4	Ceramic sherd	ceramic	body	2.8	slip + black pigment	Xindian	fine	orange (grey core)
FCN4764	96	2017	Huizuiwa	Lintao	17LH-T1-L14	Layer 4	Ceramic sherd	ceramic	body	2.5	slip + black pigment	Xindian	fine	orange (grey core)
FCN4764	10	2017	Huizuiwa	Lintao	17LH-T1-L14	Layer 4	Ceramic sherd	ceramic	body	5.2	slip + black pigment	Xindian	fine sand	light brown (grey core)
FCN4764	11	2017	Huizuiwa	Lintao	17LH-T1-L14	Layer 4	Ceramic sherd	ceramic	body	2.4	slip + black pigment	Xindian	fine sand	light brown (grey core)
FCN4764	13	2017	Huizuiwa	Lintao	17LH-T1-L14	Layer 4	Ceramic sherd	ceramic	body	2.1	slip + black pigment	Xindian	fine sand	light brown (grey core)
FCN4764	18	2017	Huizuiwa	Lintao	17LH-T1-L14	Layer 4	Ceramic sherd	ceramic	body	1.4	slip + black pigment	Xindian	fine sand	light brown (grey core)
FCN4764	42	2017	Huizuiwa	Lintao	17LH-T1-L14	Layer 4	Ceramic sherd	ceramic	body	9.2	slip + black pigment	Xindian	fine sand	orange
FCN4764	1	2017	Huizuiwa	Lintao	17LH-T1-L14	Layer 4	Ceramic sherd	ceramic	body	36.9	slip + black pigment	Xindian	fine sand	orange (grey core)
FCN4764	3	2017	Huizuiwa	Lintao	17LH-T1-L14	Layer 4	Ceramic sherd	ceramic	body	8.9	slip + black pigment	Xindian	fine sand	orange (grey core)
FCN4764	4	2017	Huizuiwa	Lintao	17LH-T1-L14	Layer 4	Ceramic sherd	ceramic	body	4.6	slip + black pigment	Xindian	fine sand	orange (grey core)
FCN4764	5	2017	Huizuiwa	Lintao	17LH-T1-L14	Layer 4	Ceramic sherd	ceramic	body	1.6	slip + black pigment	Xindian	fine sand	orange (grey core)
FCN4764	6	2017	Huizuiwa	Lintao	17LH-T1-L14	Layer 4	Ceramic sherd	ceramic	body	11.8	slip + black pigment	Xindian	fine sand	orange (grey core)
FCN4764	2	2017	Huizuiwa	Lintao	17LH-T1-L14	Layer 4	Ceramic sherd	ceramic	base	38.7	slip + black pigment	Xindian	fine sand	orange (grey core)
FCN4764	31	2017	Huizuiwa	Lintao	17LH-T1-L14	Layer 4	Ceramic sherd	ceramic	body	20.4	slip + black pigment	Xindian	fine sand	orange yellow
FCN4764	33	2017	Huizuiwa	Lintao	17LH-T1-L14	Layer 4	Ceramic sherd	ceramic	body	1.9	slip + black pigment	Xindian	fine sand	orange yellow (grey)
FCN4764	164	2017	Huizuiwa	Lintao	17LH-T1-L14	Layer 4	Ceramic sherd	ceramic	body	4.7	slip + black pigment	Xindian	coarse sand	grey
FCN4764	32	2017	Huizuiwa	Lintao	17LH-T1-L14	Layer 4	Ceramic sherd	ceramic	body	24.7	slip + black pigment	Xindian	coarse sand	orange yellow (grey)
FCN4764	205	2017	Huizuiwa	Lintao	17LH-T1-L14	Layer 4	Ceramic sherd	ceramic	body	13	slip + black pigment + fine cordmarked	Xindian	fine sand	light brown (grey core)
FCN4764	36	2017	Huizuiwa	Lintao	17LH-T1-L14	Layer 4	Ceramic sherd	ceramic	body	7.9	slip + black pigment + red pigment	Xindian	fine	light brown
FCN4764	7	2017	Huizuiwa	Lintao	17LH-T1-L14	Layer 4	Ceramic sherd	ceramic	neck	55.2	slip + black pigment + red pigment	Xindian	fine sand	orange (grey core)
FCN4764	17	2017	Huizuiwa	Lintao	17LH-T1-L14	Layer 4	Ceramic sherd	ceramic	body	1.7	slip + red pigment	Xindian	fine sand	light brown (grey core)
FCN4764	73	2017	Huizuiwa	Lintao	17LH-T1-L14	Layer 4	Ceramic sherd	ceramic	body	9	slip + red pigment	Xindian	fine sand	grey
FCN4764	91	2017	Huizuiwa	Lintao	17LH-T1-L14	Layer 4	Ceramic sherd	ceramic	body	5.7	white pigment	Xindian	medium sand	orange
FCN4764	90	2017	Huizuiwa	Lintao	17LH-T1-L14	Layer 4	Ceramic sherd	ceramic	body	1.5	white pigment	Xindian	fine	orange (grey core)
FCN4764	112	2017	Huizuiwa	Lintao	17LH-T1-L14	Layer 4	Ceramic sherd	ceramic	body	1.8	white pigment	Xindian	fine sand	grey (orange core)
FCN4764	168	2017	Huizuiwa	Lintao	17LH-T1-L14	Layer 4	Ceramic sherd	ceramic	body	3.5	white pigment + fine cordmarked	Xindian	fine sand	orange (grey core)
FCN4764	143	2017	Huizuiwa	Lintao	17LH-T1-L14	Layer 4				6.1		Xindian
FCN4771	19	2017	Huizuiwa	Lintao	17LH-T1-L15	Layer 4	Ceramic sherd	ceramic	body	10.1	appliqué	Xindian	medium sand	orange
FCN4771	10	2017	Huizuiwa	Lintao	17LH-T1-L15	Layer 4	Ceramic sherd	ceramic	body	19.6	appliqué	Xindian	medium sand	orange yellow
FCN4771	35	2017	Huizuiwa	Lintao	17LH-T1-L15	Layer 4	Ceramic sherd	ceramic	body	5.8	fine cordmarked + appliqué + incisions	Xindian	fine sand	orange
FCN4771	32	2017	Huizuiwa	Lintao	17LH-T1-L15	Layer 4	Ceramic sherd	ceramic	body	2.4	black pigment	Xindian	fine	grey
FCN4771	1	2017	Huizuiwa	Lintao	17LH-T1-L15	Layer 4	Ceramic sherd	ceramic	body	36.5	black pigment	Xindian	fine sand	orange
FCN4771	2	2017	Huizuiwa	Lintao	17LH-T1-L15	Layer 4	Ceramic sherd	ceramic	body	21.2	black pigment	Xindian	fine sand	orange
FCN4771	4	2017	Huizuiwa	Lintao	17LH-T1-L15	Layer 4	Ceramic sherd	ceramic	body	116	black pigment	Xindian	coarse sand	yellow brown
FCN4771	9	2017	Huizuiwa	Lintao	17LH-T1-L15	Layer 4	Ceramic sherd	ceramic	body	9.9	fine cordmarked	Xindian	medium sand	orange
FCN4771	18	2017	Huizuiwa	Lintao	17LH-T1-L15	Layer 4	Ceramic sherd	ceramic	body	9.3	fine cordmarked	Xindian	medium sand	orange
FCN4771	20	2017	Huizuiwa	Lintao	17LH-T1-L15	Layer 4	Ceramic sherd	ceramic	body	9	fine cordmarked	Xindian	medium sand	orange
FCN4771	31	2017	Huizuiwa	Lintao	17LH-T1-L15	Layer 4	Ceramic sherd	ceramic	body	8.6	fine cordmarked	Xindian	medium sand	orange
FCN4771	37	2017	Huizuiwa	Lintao	17LH-T1-L15	Layer 4	Ceramic sherd	ceramic	body	3.1	fine cordmarked	Xindian	medium sand	orange
FCN4771	16	2017	Huizuiwa	Lintao	17LH-T1-L15	Layer 4	Ceramic sherd	ceramic	body	13.5	fine cordmarked	Xindian	medium sand	orange yellow
FCN4771	21	2017	Huizuiwa	Lintao	17LH-T1-L15	Layer 4	Ceramic sherd	ceramic	body	9.8	fine cordmarked	Xindian	fine sand	grey
FCN4771	36	2017	Huizuiwa	Lintao	17LH-T1-L15	Layer 4	Ceramic sherd	ceramic	body	1.2	fine cordmarked	Xindian	fine sand	grey
FCN4771	15	2017	Huizuiwa	Lintao	17LH-T1-L15	Layer 4	Ceramic sherd	ceramic	body	7.4	fine cordmarked	Xindian	fine sand	orange
FCN4771	34	2017	Huizuiwa	Lintao	17LH-T1-L15	Layer 4	Ceramic sherd	ceramic	body	4.3	fine cordmarked	Xindian	fine sand	orange
FCN4771	5	2017	Huizuiwa	Lintao	17LH-T1-L15	Layer 4	Ceramic sherd	ceramic	foot	48.9	fine cordmarked	Xindian	fine sand	orange
FCN4771	27	2017	Huizuiwa	Lintao	17LH-T1-L15	Layer 4	Ceramic sherd	ceramic	body	12.8	fine cordmarked	Xindian	fine sand	orange yellow
FCN4771	17	2017	Huizuiwa	Lintao	17LH-T1-L15	Layer 4	Ceramic sherd	ceramic	handle	9.5	fine cordmarked	Xindian	fine sand	orange yellow
FCN4771	13	2017	Huizuiwa	Lintao	17LH-T1-L15	Layer 4	Ceramic sherd	ceramic	body	15.3	fine cordmarked + appliqué	Xindian	fine sand	orange yellow
FCN4771	30	2017	Huizuiwa	Lintao	17LH-T1-L15	Layer 4	Ceramic sherd	ceramic	body	5.7	plain	Xindian	medium sand	grey
FCN4771	33	2017	Huizuiwa	Lintao	17LH-T1-L15	Layer 4	Ceramic sherd	ceramic	body	7.2	plain	Xindian	medium sand	orange yellow
FCN4771	29	2017	Huizuiwa	Lintao	17LH-T1-L15	Layer 4	Ceramic sherd	ceramic	body	5.5	plain	Xindian	medium sand	yellow brown
FCN4771	38	2017	Huizuiwa	Lintao	17LH-T1-L15	Layer 4	Ceramic sherd	ceramic	N/A	0.4	plain	Xindian	fine	orange yellow
FCN4771	11	2017	Huizuiwa	Lintao	17LH-T1-L15	Layer 4	Ceramic sherd	ceramic	body	8.7	plain	Xindian	fine sand	orange
FCN4771	12	2017	Huizuiwa	Lintao	17LH-T1-L15	Layer 4	Ceramic sherd	ceramic	body	11.9	plain	Xindian	fine sand	orange
FCN4771	24	2017	Huizuiwa	Lintao	17LH-T1-L15	Layer 4	Ceramic sherd	ceramic	body	3.8	plain	Xindian	fine sand	orange
FCN4771	28	2017	Huizuiwa	Lintao	17LH-T1-L15	Layer 4	Ceramic sherd	ceramic	body	8.1	plain	Xindian	fine sand	orange yellow
FCN4771	14	2017	Huizuiwa	Lintao	17LH-T1-L15	Layer 4	Ceramic sherd	ceramic	body	16.2	plain	Xindian	coarse sand	orange
FCN4771	25	2017	Huizuiwa	Lintao	17LH-T1-L15	Layer 4	Ceramic sherd	ceramic	body	13.2	slip	Xindian	medium sand	orange
FCN4771	7	2017	Huizuiwa	Lintao	17LH-T1-L15	Layer 4	Ceramic sherd	ceramic	handle	17.5	slip	Xindian	medium sand	orange yellow
FCN4771	8	2017	Huizuiwa	Lintao	17LH-T1-L15	Layer 4	Ceramic sherd	ceramic	body	25.9	slip + black pigment	Xindian	medium sand	orange
FCN4771	26	2017	Huizuiwa	Lintao	17LH-T1-L15	Layer 4	Ceramic sherd	ceramic	body	5.4	slip + black pigment	Xindian	medium sand	orange yellow
FCN4771	22	2017	Huizuiwa	Lintao	17LH-T1-L15	Layer 4	Ceramic sherd	ceramic	body	6.8	slip + black pigment	Xindian	fine sand	grey
FCN4771	3	2017	Huizuiwa	Lintao	17LH-T1-L15	Layer 4	Ceramic sherd	ceramic	body	41.4	slip + black pigment	Xindian	fine sand	orange
FCN4771	23	2017	Huizuiwa	Lintao	17LH-T1-L15	Layer 4	Ceramic sherd	ceramic	body	4.5	slip + black pigment	Xindian	fine sand	orange
FCN4771	6	2017	Huizuiwa	Lintao	17LH-T1-L15	Layer 4	Ceramic sherd	ceramic	body	30.6	slip + black pigment	Xindian	coarse sand	orange
FCN4776	18	2017	Huizuiwa	Lintao	17LH-T1-L16	H3	Ceramic sherd	ceramic	body	6.2	appliqué	Xindian	medium sand	grey
FCN4776	10	2017	Huizuiwa	Lintao	17LH-T1-L16	H3	Ceramic sherd	ceramic	body	19	appliqué	Xindian	medium sand	orange
FCN4776	11	2017	Huizuiwa	Lintao	17LH-T1-L16	H3	Ceramic sherd	ceramic	body	22.2	appliqué	Xindian	medium sand	orange
FCN4776	4	2017	Huizuiwa	Lintao	17LH-T1-L16	H3	Ceramic sherd	ceramic	body	23.3	appliqué	Xindian	coarse sand	orange
FCN4776	15	2017	Huizuiwa	Lintao	17LH-T1-L16	H3	Ceramic sherd	ceramic	body	6.1	black pigment	Xindian	medium sand	orange
FCN4776	13	2017	Huizuiwa	Lintao	17LH-T1-L16	H3	Ceramic sherd	ceramic	body	13.3	black pigment	Xindian	medium sand	orange yellow
FCN4776	17	2017	Huizuiwa	Lintao	17LH-T1-L16	H3	Ceramic sherd	ceramic	body	6.2	black pigment	Xindian	medium sand	yellow brown
FCN4776	16	2017	Huizuiwa	Lintao	17LH-T1-L16	H3	Ceramic sherd	ceramic	handle	3.7	black pigment	Xindian	fine	orange yellow
FCN4776	22	2017	Huizuiwa	Lintao	17LH-T1-L16	H3	Ceramic sherd	ceramic	body	0.8	black pigment	Xindian	fine	yellow brown
FCN4776	9	2017	Huizuiwa	Lintao	17LH-T1-L16	H3	Ceramic sherd	ceramic	body	9.6	black pigment	Xindian	fine sand	orange
FCN4776	7	2017	Huizuiwa	Lintao	17LH-T1-L16	H3	Ceramic sherd	ceramic	body	18.6	fine cordmarked	Xindian	medium sand	orange
FCN4776	14	2017	Huizuiwa	Lintao	17LH-T1-L16	H3	Ceramic sherd	ceramic	body	10.2	fine cordmarked	Xindian	medium sand	orange
FCN4776	6	2017	Huizuiwa	Lintao	17LH-T1-L16	H3	Ceramic sherd	ceramic	body	9.2	fine cordmarked	Xindian	fine sand	grey
FCN4776	5	2017	Huizuiwa	Lintao	17LH-T1-L16	H3	Ceramic sherd	ceramic	body	7.8	fine cordmarked	Xindian	fine sand	orange
FCN4776	8	2017	Huizuiwa	Lintao	17LH-T1-L16	H3	Ceramic sherd	ceramic	body	17.4	fine cordmarked	Xindian	fine sand	orange
FCN4776	20	2017	Huizuiwa	Lintao	17LH-T1-L16	H3	Ceramic sherd	ceramic	body	2.4	plain	Xindian	medium sand	orange
FCN4776	23	2017	Huizuiwa	Lintao	17LH-T1-L16	H3	Ceramic sherd	ceramic	body	2	plain	Xindian	medium sand	orange
FCN4776	24	2017	Huizuiwa	Lintao	17LH-T1-L16	H3	Ceramic sherd	ceramic	body	2.7	plain	Xindian	medium sand	orange
FCN4776	21	2017	Huizuiwa	Lintao	17LH-T1-L16	H3	Ceramic sherd	ceramic	body	2.5	plain	Xindian	medium sand	orange yellow
FCN4776	3	2017	Huizuiwa	Lintao	17LH-T1-L16	H3	Ceramic sherd	ceramic	body	26.8	slip + black pigment	Xindian	medium sand	orange
FCN4776	2	2017	Huizuiwa	Lintao	17LH-T1-L16	H3	Ceramic sherd	ceramic	body	71	slip + black pigment	Xindian	medium sand	orange yellow
FCN4776	1	2017	Huizuiwa	Lintao	17LH-T1-L16	H3	Ceramic sherd	ceramic	neck	63.3	slip + black pigment	Xindian	medium sand	orange yellow
FCN4776	19	2017	Huizuiwa	Lintao	17LH-T1-L16	H3	Ceramic sherd	ceramic	body	3	slip + black pigment	Xindian	fine sand	grey
FCN4776	12	2017	Huizuiwa	Lintao	17LH-T1-L16	H3	Ceramic sherd	ceramic	body	7.5	slip + black pigment	Xindian	fine sand	yellow brown
FCN5048	1	2017	Huizuiwa	Lintao	17LH-T1-L16	H3	Ceramic sherd	ceramic	body	27.3	black pigment	Xindian	medium sand	light brown
FCN5048	3	2017	Huizuiwa	Lintao	17LH-T1-L16	H3	Ceramic sherd	ceramic	body	3.6	fine cordmarked	Xindian	medium sand	orange
FCN5048	2	2017	Huizuiwa	Lintao	17LH-T1-L16	H3	Ceramic sherd	ceramic	body	19.8	slip	Xindian	medium sand	light brown
FCN4784	18	2017	Huizuiwa	Lintao	17LH-T1-L17	H2	Ceramic sherd	ceramic	body	5.5	appliqué	Xindian	coarse sand	orange
FCN4784	16	2017	Huizuiwa	Lintao	17LH-T1-L17	H2	Ceramic sherd	ceramic	body	6.5	black pigment	Xindian	fine	grey
FCN4784	15	2017	Huizuiwa	Lintao	17LH-T1-L17	H2	Ceramic sherd	ceramic	body	21.1	black pigment	Xindian	fine sand	orange (grey core)
FCN4784	13	2017	Huizuiwa	Lintao	17LH-T1-L17	H2	Ceramic sherd	ceramic	body	11.7	black pigment + white pigment	Xindian	coarse sand	orange (brown)
FCN4784	21	2017	Huizuiwa	Lintao	17LH-T1-L17	H2	Ceramic sherd	ceramic	body	8.6	fine cordmarked	Xindian	medium sand	grey (orange yellow)
FCN4784	7	2017	Huizuiwa	Lintao	17LH-T1-L17	H2	Ceramic sherd	ceramic	body	45.7	fine cordmarked	Xindian	fine sand	light brown (grey core)
FCN4784	3	2017	Huizuiwa	Lintao	17LH-T1-L17	H2	Ceramic sherd	ceramic	body	8.3	fine cordmarked	Xindian	fine sand	grey
FCN4784	4	2017	Huizuiwa	Lintao	17LH-T1-L17	H2	Ceramic sherd	ceramic	body	7.6	fine cordmarked	Xindian	fine sand	grey
FCN4784	5	2017	Huizuiwa	Lintao	17LH-T1-L17	H2	Ceramic sherd	ceramic	body	6.6	fine cordmarked	Xindian	fine sand	grey
FCN4784	23	2017	Huizuiwa	Lintao	17LH-T1-L17	H2	Ceramic sherd	ceramic	body	4.2	fine cordmarked	Xindian	fine sand	orange yellow
FCN4784	14	2017	Huizuiwa	Lintao	17LH-T1-L17	H2	Ceramic sherd	ceramic	body	13.3	fine cordmarked	Xindian	coarse sand	grey (orange core)
FCN4784	11	2017	Huizuiwa	Lintao	17LH-T1-L17	H2	Ceramic sherd	ceramic	body	29.1	fine cordmarked	Xindian	coarse sand	orange
FCN4784	2	2017	Huizuiwa	Lintao	17LH-T1-L17	H2	Ceramic sherd	ceramic	base	80.3	slip + fine cordmarked	Xindian	fine sand	orange (grey core)
FCN4784	20	2017	Huizuiwa	Lintao	17LH-T1-L17	H2	Ceramic sherd	ceramic	body	2.3	plain	Xindian	fine	orange
FCN4784	22	2017	Huizuiwa	Lintao	17LH-T1-L17	H2	Ceramic sherd	ceramic	body	3.5	plain	Xindian	fine	orange
FCN4784	19	2017	Huizuiwa	Lintao	17LH-T1-L17	H2	Ceramic sherd	ceramic	handle	9.9	plain	Xindian	fine sand	orange
FCN4784	10	2017	Huizuiwa	Lintao	17LH-T1-L17	H2	Ceramic sherd	ceramic	body	10.3	plain	Xindian	fine sand	orange (grey core)
FCN4784	8	2017	Huizuiwa	Lintao	17LH-T1-L17	H2	Ceramic sherd	ceramic	body	28.1	slip	Xindian	coarse sand	orange (grey core)
FCN4784	6	2017	Huizuiwa	Lintao	17LH-T1-L17	H2	Ceramic sherd	ceramic	body	9.5	slip + black pigment	Xindian	fine sand	red (grey)
FCN4784	17	2017	Huizuiwa	Lintao	17LH-T1-L17	H2	Ceramic sherd	ceramic	body	5.1	slip + black pigment + fine cordmarked	Xindian	fine sand	orange (grey core)
FCN4784	1	2017	Huizuiwa	Lintao	17LH-T1-L17	H2	Ceramic sherd	ceramic	neck	64.5	slip + black pigment + fine cordmarked	Xindian	fine sand	orange (grey core)
FCN4784	12	2017	Huizuiwa	Lintao	17LH-T1-L17	H2	Ceramic sherd	ceramic	body	11.2	slip + black pigment + white pigment	Xindian	fine sand	orange (grey core)
FCN4784	9	2017	Huizuiwa	Lintao	17LH-T1-L17	H2	Ceramic sherd	ceramic	body	14.1	slip + black pigment + white pigment	Xindian	fine sand	orange yellow
FCN4790	60	2017	Huizuiwa	Lintao	17LH-T1-L18	H3	Ceramic sherd	ceramic	body	10.5	appliqué	Xindian	fine sand	orange
FCN4790	53	2017	Huizuiwa	Lintao	17LH-T1-L18	H3	Ceramic sherd	ceramic	body	32.3	appliqué + incisions	Xindian	medium sand	orange
FCN4790	74	2017	Huizuiwa	Lintao	17LH-T1-L18	H3	Ceramic sherd	ceramic	body	3.7	basket impressions	Xindian	fine sand	orange
FCN4790	15	2017	Huizuiwa	Lintao	17LH-T1-L18	H3	Ceramic sherd	ceramic	body	30.1	black pigment	Xindian	medium sand	grey
FCN4790	3	2017	Huizuiwa	Lintao	17LH-T1-L18	H3	Ceramic sherd	ceramic	body	153.2	black pigment	Xindian	medium sand	orange
FCN4790	42	2017	Huizuiwa	Lintao	17LH-T1-L18	H3	Ceramic sherd	ceramic	body	9.5	black pigment	Xindian	medium sand	orange
FCN4790	63	2017	Huizuiwa	Lintao	17LH-T1-L18	H3	Ceramic sherd	ceramic	body	8.4	black pigment	Xindian	medium sand	orange
FCN4790	72	2017	Huizuiwa	Lintao	17LH-T1-L18	H3	Ceramic sherd	ceramic	body	3.1	black pigment	Xindian	medium sand	orange
FCN4790	95	2017	Huizuiwa	Lintao	17LH-T1-L18	H3	Ceramic sherd	ceramic	body	3.7	black pigment	Xindian	medium sand	orange
FCN4790	28	2017	Huizuiwa	Lintao	17LH-T1-L18	H3	Ceramic sherd	ceramic	body	2.8	black pigment	Xindian	fine	orange
FCN4790	82	2017	Huizuiwa	Lintao	17LH-T1-L18	H3	Ceramic sherd	ceramic	body	0.9	black pigment	Xindian	fine	orange
FCN4790	86	2017	Huizuiwa	Lintao	17LH-T1-L18	H3	Ceramic sherd	ceramic	body	1.4	black pigment	Xindian	fine	orange
FCN4790	88	2017	Huizuiwa	Lintao	17LH-T1-L18	H3	Ceramic sherd	ceramic	body	2.9	black pigment	Xindian	fine	yellow brown
FCN4790	89	2017	Huizuiwa	Lintao	17LH-T1-L18	H3	Ceramic sherd	ceramic	body	6.9	black pigment	Xindian	fine	yellow brown
FCN4790	61	2017	Huizuiwa	Lintao	17LH-T1-L18	H3	Ceramic sherd	ceramic	body	3.7	black pigment	Xindian	fine sand	orange
FCN4790	97	2017	Huizuiwa	Lintao	17LH-T1-L18	H3	Ceramic sherd	ceramic	body	1.9	black pigment	Xindian	fine sand	orange
FCN4790	51	2017	Huizuiwa	Lintao	17LH-T1-L18	H3	Ceramic sherd	ceramic	body	15.6	black pigment	Xindian	fine sand	orange yellow
FCN4790	69	2017	Huizuiwa	Lintao	17LH-T1-L18	H3	Ceramic sherd	ceramic	body	3.9	black pigment	Xindian	fine sand	orange yellow
FCN4790	16	2017	Huizuiwa	Lintao	17LH-T1-L18	H3	Ceramic sherd	ceramic	body	37.7	black pigment	Xindian	coarse sand	orange
FCN4790	10	2017	Huizuiwa	Lintao	17LH-T1-L18	H3	Ceramic sherd	ceramic	body	42.8	black pigment	Xindian	coarse sand	orange yellow
FCN4790	85	2017	Huizuiwa	Lintao	17LH-T1-L18	H3	Ceramic sherd	ceramic	body	6	black pigment + fine cordmarked	Xindian	fine	yellow brown
FCN4790	58	2017	Huizuiwa	Lintao	17LH-T1-L18	H3	Ceramic sherd	ceramic	handle	8.3	black pigment + red pigment	Xindian	fine	orange yellow
FCN4790	14	2017	Huizuiwa	Lintao	17LH-T1-L18	H3	Ceramic sherd	ceramic	body	30.2	black pigment + white pigment	Xindian	medium sand	orange
FCN4790	19	2017	Huizuiwa	Lintao	17LH-T1-L18	H3	Ceramic sherd	ceramic	body	17.6	fine cordmarked	Xindian	medium sand	brown
FCN4790	49	2017	Huizuiwa	Lintao	17LH-T1-L18	H3	Ceramic sherd	ceramic	foot	17.7	fine cordmarked	Xindian	medium sand	grey
FCN4790	50	2017	Huizuiwa	Lintao	17LH-T1-L18	H3	Ceramic sherd	ceramic	body	23.3	fine cordmarked	Xindian	medium sand	grey brown
FCN4790	7	2017	Huizuiwa	Lintao	17LH-T1-L18	H3	Ceramic sherd	ceramic	body	32.9	fine cordmarked	Xindian	medium sand	orange
FCN4790	44	2017	Huizuiwa	Lintao	17LH-T1-L18	H3	Ceramic sherd	ceramic	body	11.1	fine cordmarked	Xindian	medium sand	orange
FCN4790	46	2017	Huizuiwa	Lintao	17LH-T1-L18	H3	Ceramic sherd	ceramic	body	8.4	fine cordmarked	Xindian	medium sand	orange
FCN4790	52	2017	Huizuiwa	Lintao	17LH-T1-L18	H3	Ceramic sherd	ceramic	body	44.1	fine cordmarked	Xindian	medium sand	orange
FCN4790	56	2017	Huizuiwa	Lintao	17LH-T1-L18	H3	Ceramic sherd	ceramic	body	14.6	fine cordmarked	Xindian	medium sand	orange
FCN4790	62	2017	Huizuiwa	Lintao	17LH-T1-L18	H3	Ceramic sherd	ceramic	body	5.5	fine cordmarked	Xindian	medium sand	orange
FCN4790	92	2017	Huizuiwa	Lintao	17LH-T1-L18	H3	Ceramic sherd	ceramic	body	17.7	fine cordmarked	Xindian	medium sand	orange
FCN4790	68	2017	Huizuiwa	Lintao	17LH-T1-L18	H3	Ceramic sherd	ceramic	body	5.9	fine cordmarked	Xindian	fine sand	brown
FCN4790	18	2017	Huizuiwa	Lintao	17LH-T1-L18	H3	Ceramic sherd	ceramic	body	26.7	fine cordmarked	Xindian	fine sand	grey
FCN4790	36	2017	Huizuiwa	Lintao	17LH-T1-L18	H3	Ceramic sherd	ceramic	body	2.9	fine cordmarked	Xindian	fine sand	grey
FCN4790	64	2017	Huizuiwa	Lintao	17LH-T1-L18	H3	Ceramic sherd	ceramic	body	7.1	fine cordmarked	Xindian	fine sand	grey
FCN4790	31	2017	Huizuiwa	Lintao	17LH-T1-L18	H3	Ceramic sherd	ceramic	body	8	fine cordmarked	Xindian	fine sand	orange
FCN4790	38	2017	Huizuiwa	Lintao	17LH-T1-L18	H3	Ceramic sherd	ceramic	body	6.7	fine cordmarked	Xindian	fine sand	orange
FCN4790	43	2017	Huizuiwa	Lintao	17LH-T1-L18	H3	Ceramic sherd	ceramic	body	8.7	fine cordmarked	Xindian	fine sand	orange
FCN4790	76	2017	Huizuiwa	Lintao	17LH-T1-L18	H3	Ceramic sherd	ceramic	body	3.2	fine cordmarked	Xindian	fine sand	orange
FCN4790	30	2017	Huizuiwa	Lintao	17LH-T1-L18	H3	Ceramic sherd	ceramic	body	10.1	fine cordmarked	Xindian	fine sand	orange yellow
FCN4790	39	2017	Huizuiwa	Lintao	17LH-T1-L18	H3	Ceramic sherd	ceramic	body	7.2	fine cordmarked	Xindian	fine sand	yellow brown
FCN4790	6	2017	Huizuiwa	Lintao	17LH-T1-L18	H3	Ceramic sherd	ceramic	body	212.3	fine cordmarked	Xindian	coarse sand	orange
FCN4790	59	2017	Huizuiwa	Lintao	17LH-T1-L18	H3	Ceramic sherd	ceramic	body	23	fine cordmarked	Xindian	coarse sand	orange
FCN4790	11	2017	Huizuiwa	Lintao	17LH-T1-L18	H3	Ceramic sherd	ceramic	foot	24.2	fine cordmarked	Xindian	coarse sand	orange
FCN4790	8	2017	Huizuiwa	Lintao	17LH-T1-L18	H3	Ceramic sherd	ceramic	body	65.3	fine cordmarked	Xindian	coarse sand	red brown
FCN4790	1	2017	Huizuiwa	Lintao	17LH-T1-L18	H3	Ceramic sherd	ceramic	body	229.2	fine cordmarked	Xindian	coarse sand	yellow brown
FCN4790	4	2017	Huizuiwa	Lintao	17LH-T1-L18	H3	Ceramic sherd	ceramic	body	231.5	fine cordmarked	Xindian	coarse sand	yellow brown
FCN4790	2	2017	Huizuiwa	Lintao	17LH-T1-L18	H3	Ceramic sherd	ceramic	base	190.8	fine cordmarked	Xindian	coarse sand	yellow brown
FCN4790	9	2017	Huizuiwa	Lintao	17LH-T1-L18	H3	Ceramic sherd	ceramic	foot	71.2	fine cordmarked	Xindian	coarse sand	yellow brown
FCN4790	17	2017	Huizuiwa	Lintao	17LH-T1-L18	H3	Ceramic sherd	ceramic	body	15.7	fine cordmarked + appliqué	Xindian	fine sand	red brown
FCN4790	27	2017	Huizuiwa	Lintao	17LH-T1-L18	H3	Ceramic sherd	ceramic	body	9.3	black pigment + fine cordmarked	Xindian	fine sand	grey
FCN4790	96	2017	Huizuiwa	Lintao	17LH-T1-L18	H3	Ceramic sherd	ceramic	body	3.6	slip + fine cordmarked	Xindian	fine sand	grey black
FCN4790	55	2017	Huizuiwa	Lintao	17LH-T1-L18	H3	Ceramic sherd	ceramic	body	7	folded rim	Xindian	fine sand	orange
FCN4790	22	2017	Huizuiwa	Lintao	17LH-T1-L18	H3	Ceramic sherd	ceramic	body	16.1	incisions	Xindian	medium sand	orange
FCN4790	71	2017	Huizuiwa	Lintao	17LH-T1-L18	H3	Ceramic sherd	ceramic	body	13.4	line incisions	Xindian	fine sand	orange
FCN4790	94	2017	Huizuiwa	Lintao	17LH-T1-L18	H3	stone object	stone			N/A	Xindian
FCN4790	33	2017	Huizuiwa	Lintao	17LH-T1-L18	H3	Ceramic sherd	ceramic	body	10.5	plain	Xindian	medium sand	grey
FCN4790	45	2017	Huizuiwa	Lintao	17LH-T1-L18	H3	Ceramic sherd	ceramic	body	3.4	plain	Xindian	medium sand	grey brown
FCN4790	32	2017	Huizuiwa	Lintao	17LH-T1-L18	H3	Ceramic sherd	ceramic	body	8.6	plain	Xindian	medium sand	orange
FCN4790	34	2017	Huizuiwa	Lintao	17LH-T1-L18	H3	Ceramic sherd	ceramic	body	3.5	plain	Xindian	medium sand	orange
FCN4790	54	2017	Huizuiwa	Lintao	17LH-T1-L18	H3	Ceramic sherd	ceramic	body	10.6	plain	Xindian	medium sand	orange
FCN4790	65	2017	Huizuiwa	Lintao	17LH-T1-L18	H3	Ceramic sherd	ceramic	body	9.3	plain	Xindian	medium sand	orange
FCN4790	35	2017	Huizuiwa	Lintao	17LH-T1-L18	H3	Ceramic sherd	ceramic	body	3	plain	Xindian	fine	orange
FCN4790	75	2017	Huizuiwa	Lintao	17LH-T1-L18	H3	Ceramic sherd	ceramic	body	2.7	plain	Xindian	fine	orange
FCN4790	77	2017	Huizuiwa	Lintao	17LH-T1-L18	H3	Ceramic sherd	ceramic	body	1.6	plain	Xindian	fine	orange
FCN4790	70	2017	Huizuiwa	Lintao	17LH-T1-L18	H3	Ceramic sherd	ceramic	body	6.3	plain	Xindian	fine sand	brown
FCN4790	20	2017	Huizuiwa	Lintao	17LH-T1-L18	H3	Ceramic sherd	ceramic	body	16.7	plain	Xindian	fine sand	grey
FCN4790	26	2017	Huizuiwa	Lintao	17LH-T1-L18	H3	Ceramic sherd	ceramic	body	6.9	plain	Xindian	fine sand	grey
FCN4790	37	2017	Huizuiwa	Lintao	17LH-T1-L18	H3	Ceramic sherd	ceramic	body	5	plain	Xindian	fine sand	grey
FCN4790	21	2017	Huizuiwa	Lintao	17LH-T1-L18	H3	Ceramic sherd	ceramic	body	10	plain	Xindian	fine sand	grey black
FCN4790	73	2017	Huizuiwa	Lintao	17LH-T1-L18	H3	Ceramic sherd	ceramic	body	2	plain	Xindian	fine sand	orange
FCN4790	79	2017	Huizuiwa	Lintao	17LH-T1-L18	H3	Ceramic sherd	ceramic	body	1.5	plain	Xindian	fine sand	orange
FCN4790	81	2017	Huizuiwa	Lintao	17LH-T1-L18	H3	Ceramic sherd	ceramic	body	2	plain	Xindian	fine sand	orange
FCN4790	47	2017	Huizuiwa	Lintao	17LH-T1-L18	H3	Ceramic sherd	ceramic	handle	5.2	plain	Xindian	fine sand	orange
FCN4790	12	2017	Huizuiwa	Lintao	17LH-T1-L18	H3	Ceramic sherd	ceramic	body	8.5	plain	Xindian	fine sand	orange yellow
FCN4790	24	2017	Huizuiwa	Lintao	17LH-T1-L18	H3	Ceramic sherd	ceramic	base	15	plain	Xindian	fine sand	orange yellow
FCN4790	48	2017	Huizuiwa	Lintao	17LH-T1-L18	H3	Ceramic sherd	ceramic	handle	6.7	plain	Xindian	fine sand	yellow brown
FCN4790	13	2017	Huizuiwa	Lintao	17LH-T1-L18	H3	Ceramic sherd	ceramic	body	38.3	plain	Xindian	coarse sand	orange
FCN4790	40	2017	Huizuiwa	Lintao	17LH-T1-L18	H3	Ceramic sherd	ceramic	body	10.8	plain	Xindian	coarse sand	orange
FCN4790	57	2017	Huizuiwa	Lintao	17LH-T1-L18	H3	Ceramic sherd	ceramic	body	9.1	polish	Xindian	fine sand	grey
FCN4790	41	2017	Huizuiwa	Lintao	17LH-T1-L18	H3	Ceramic sherd	ceramic	body	6.6	slip	Xindian	fine	orange
FCN4790	29	2017	Huizuiwa	Lintao	17LH-T1-L18	H3	Ceramic sherd	ceramic	body	6.7	slip	Xindian	fine sand	orange
FCN4790	67	2017	Huizuiwa	Lintao	17LH-T1-L18	H3	Ceramic sherd	ceramic	body	4.6	slip	Xindian	fine sand	orange yellow
FCN4790	87	2017	Huizuiwa	Lintao	17LH-T1-L18	H3	Ceramic sherd	ceramic	body	9.8	slip	Xindian	fine sand	yellow brown
FCN4790	25	2017	Huizuiwa	Lintao	17LH-T1-L18	H3	Ceramic sherd	ceramic	body	10.6	slip	Xindian	coarse sand	grey
FCN4790	78	2017	Huizuiwa	Lintao	17LH-T1-L18	H3	Ceramic sherd	ceramic	body	9.2	slip + black pigment	Xindian	medium sand	brown
FCN4790	23	2017	Huizuiwa	Lintao	17LH-T1-L18	H3	Ceramic sherd	ceramic	body	8.1	slip + black pigment	Xindian	fine sand	brown
FCN4790	83	2017	Huizuiwa	Lintao	17LH-T1-L18	H3	Ceramic sherd	ceramic	body	8.1	slip + black pigment	Xindian	fine sand	orange
FCN4790	84	2017	Huizuiwa	Lintao	17LH-T1-L18	H3	Ceramic sherd	ceramic	body	22.3	slip + black pigment	Xindian	fine sand	orange
FCN4790	90	2017	Huizuiwa	Lintao	17LH-T1-L18	H3	Ceramic sherd	ceramic	body	15.2	slip + black pigment	Xindian	fine sand	orange
FCN4790	66	2017	Huizuiwa	Lintao	17LH-T1-L18	H3	Ceramic sherd	ceramic	body	5.3	slip + black pigment	Xindian	fine sand	orange
FCN4790	91	2017	Huizuiwa	Lintao	17LH-T1-L18	H3	Ceramic sherd	ceramic	body	41.5	slip + black pigment	Xindian	fine sand	orange
FCN4790	5	2017	Huizuiwa	Lintao	17LH-T1-L18	H3	Ceramic sherd	ceramic	body	149.8	slip + black pigment	Xindian	coarse sand	red brown
FCN4790	80	2017	Huizuiwa	Lintao	17LH-T1-L18	H3	Ceramic sherd	ceramic	body	12	slip + fine cordmarked	Xindian	coarse sand	orange
FCN4795	32	2017	Huizuiwa	Lintao	17LH-T1-L20	H3	Ceramic sherd	ceramic	body	0.6	black pigment	Xindian	medium sand	orange
FCN4795	33	2017	Huizuiwa	Lintao	17LH-T1-L20	H3	Ceramic sherd	ceramic	base	9.2	black pigment	Xindian	medium sand	orange
FCN4795	21	2017	Huizuiwa	Lintao	17LH-T1-L20	H3	Ceramic sherd	ceramic	body	3.2	black pigment	Xindian	fine	light brown
FCN4795	28	2017	Huizuiwa	Lintao	17LH-T1-L20	H3	Ceramic sherd	ceramic	body	5.2	black pigment	Xindian	fine	orange
FCN4795	1	2017	Huizuiwa	Lintao	17LH-T1-L20	H3	Ceramic sherd	ceramic	handle	77.8	black pigment	Xindian	fine sand	light brown (red)
FCN4795	29	2017	Huizuiwa	Lintao	17LH-T1-L20	H3	Ceramic sherd	ceramic	handle	3.5	black pigment	Xindian	fine sand	orange
FCN4795	9	2017	Huizuiwa	Lintao	17LH-T1-L20	H3	Ceramic sherd	ceramic	base	25.1	black pigment + fine cordmarked	Xindian	fine sand	light brown
FCN4795	2	2017	Huizuiwa	Lintao	17LH-T1-L20	H3	Ceramic sherd	ceramic	body	18.2	black pigment + fine cordmarked	Xindian	fine sand	light brown (red)
FCN4795	13	2017	Huizuiwa	Lintao	17LH-T1-L20	H3	Ceramic sherd	ceramic	body	22.6	black pigment + fine cordmarked	Xindian	coarse sand	orange (grey core)
FCN4795	7	2017	Huizuiwa	Lintao	17LH-T1-L20	H3	Ceramic sherd	ceramic	handle	23.7	black pigment + red pigment	Xindian	medium sand	light brown (orange)
FCN4795	22	2017	Huizuiwa	Lintao	17LH-T1-L20	H3	Ceramic sherd	ceramic	body	12.4	black pigment + white pigment	Xindian	coarse sand	red
FCN4795	18	2017	Huizuiwa	Lintao	17LH-T1-L20	H3	Ceramic sherd	ceramic	body	14.8	fine cordmarked	Xindian	fine sand	light brown
FCN4795	25	2017	Huizuiwa	Lintao	17LH-T1-L20	H3	Ceramic sherd	ceramic	body	13.3	fine cordmarked	Xindian	fine sand	light brown
FCN4795	23	2017	Huizuiwa	Lintao	17LH-T1-L20	H3	Ceramic sherd	ceramic	body	6.5	fine cordmarked	Xindian	fine sand	orange
FCN4795	17	2017	Huizuiwa	Lintao	17LH-T1-L20	H3	Ceramic sherd	ceramic	body	17.4	fine cordmarked	Xindian	fine sand	orange (grey core)
FCN4795	26	2017	Huizuiwa	Lintao	17LH-T1-L20	H3	Ceramic sherd	ceramic	body	8.9	fine cordmarked	Xindian	fine sand	orange yellow
FCN4795	19	2017	Huizuiwa	Lintao	17LH-T1-L20	H3	Ceramic sherd	ceramic	body	11.8	fine cordmarked	Xindian	coarse sand	grey (orange core)
FCN4795	20	2017	Huizuiwa	Lintao	17LH-T1-L20	H3	Ceramic sherd	ceramic	body	16.6	fine cordmarked	Xindian	coarse sand	orange
FCN4795	5	2017	Huizuiwa	Lintao	17LH-T1-L20	H3	Ceramic sherd	ceramic	body	13.1	fine cordmarked + appliqué	Xindian	fine sand	orange (brown)
FCN4795	24	2017	Huizuiwa	Lintao	17LH-T1-L20	H3	Ceramic sherd	ceramic	body	9.9	black pigment + fine cordmarked	Xindian	coarse sand	orange
FCN4795	3	2017	Huizuiwa	Lintao	17LH-T1-L20	H3	Ceramic sherd	ceramic	base	54.3	slip + fine cordmarked	Xindian	fine sand	light brown (red)
FCN4795	15	2017	Huizuiwa	Lintao	17LH-T1-L20	H3	Ceramic sherd	ceramic	body	18.2	slip + fine cordmarked	Xindian	coarse sand	orange
FCN4795	31	2017	Huizuiwa	Lintao	17LH-T1-L20	H3	Ceramic sherd	ceramic	body	8.7	plain	Xindian	medium sand	orange
FCN4795	6	2017	Huizuiwa	Lintao	17LH-T1-L20	H3	Ceramic sherd	ceramic	handle	19.2	plain	Xindian	fine sand	orange (grey core)
FCN4795	16	2017	Huizuiwa	Lintao	17LH-T1-L20	H3	Ceramic sherd	ceramic	body	25.6	plain	Xindian	coarse sand	grey
FCN4795	4	2017	Huizuiwa	Lintao	17LH-T1-L20	H3	Ceramic sherd	ceramic	body	33.8	plain	Xindian	coarse sand	orange
FCN4795	14	2017	Huizuiwa	Lintao	17LH-T1-L20	H3	Ceramic sherd	ceramic	body	29.4	slip	Xindian	medium sand	grey (brown core)
FCN4795	27	2017	Huizuiwa	Lintao	17LH-T1-L20	H3	Ceramic sherd	ceramic	body	6.1	slip	Xindian	fine	light brown (orange)
FCN4795	10	2017	Huizuiwa	Lintao	17LH-T1-L20	H3	Ceramic sherd	ceramic	body	33.1	slip + black pigment	Xindian	medium sand	orange
FCN4795	34	2017	Huizuiwa	Lintao	17LH-T1-L20	H3	Ceramic sherd	ceramic	body	6.3	slip + black pigment	Xindian	fine	orange
FCN4795	30	2017	Huizuiwa	Lintao	17LH-T1-L20	H3	Ceramic sherd	ceramic	body	1	slip + black pigment	Xindian	fine sand	orange
FCN4795	11	2017	Huizuiwa	Lintao	17LH-T1-L20	H3	Ceramic sherd	ceramic	body	43.2	slip + black pigment	Xindian	coarse sand	orange (grey core)
FCN4795	12	2017	Huizuiwa	Lintao	17LH-T1-L20	H3	Ceramic sherd	ceramic	body	43.5	slip + black pigment	Xindian	coarse sand	orange (grey core)
FCN4795	8	2017	Huizuiwa	Lintao	17LH-T1-L20	H3	Ceramic sherd	ceramic	body	37.3	slip + black pigment + white pigment	Xindian	medium sand	grey (orange core)
FCN4799	19	2017	Huizuiwa	Lintao	17LH-T1-L21	H3	Ceramic sherd	ceramic	body	13.8	appliqué	Xindian	medium sand	orange
FCN4799	12	2017	Huizuiwa	Lintao	17LH-T1-L21	H3	Ceramic sherd	ceramic	body	5.1	black pigment	Xindian	medium sand	orange
FCN4799	13	2017	Huizuiwa	Lintao	17LH-T1-L21	H3	Ceramic sherd	ceramic	body	12.6	black pigment	Xindian	medium sand	orange
FCN4799	22	2017	Huizuiwa	Lintao	17LH-T1-L21	H3	Ceramic sherd	ceramic	body	3.9	black pigment	Xindian	fine sand	orange
FCN4799	6	2017	Huizuiwa	Lintao	17LH-T1-L21	H3	Ceramic sherd	ceramic	body	23.5	black pigment + red pigment	Xindian	fine sand	orange
FCN4799	10	2017	Huizuiwa	Lintao	17LH-T1-L21	H3	Ceramic sherd	ceramic	handle	12.3	fine cordmarked	Xindian	medium sand	brown
FCN4799	17	2017	Huizuiwa	Lintao	17LH-T1-L21	H3	Ceramic sherd	ceramic	body	5.1	fine cordmarked	Xindian	fine sand	brown
FCN4799	14	2017	Huizuiwa	Lintao	17LH-T1-L21	H3	Ceramic sherd	ceramic	body	6.1	fine cordmarked	Xindian	fine sand	orange
FCN4799	11	2017	Huizuiwa	Lintao	17LH-T1-L21	H3	Ceramic sherd	ceramic	body	6.4	folded rim	Xindian	fine sand	yellow brown
FCN4799	20	2017	Huizuiwa	Lintao	17LH-T1-L21	H3	Ceramic sherd	ceramic	body	11.1	plain	Xindian	medium sand	brown
FCN4799	2	2017	Huizuiwa	Lintao	17LH-T1-L21	H3	Ceramic sherd	ceramic	body	23.4	plain	Xindian	medium sand	orange
FCN4799	16	2017	Huizuiwa	Lintao	17LH-T1-L21	H3	Ceramic sherd	ceramic	body	8.9	plain	Xindian	medium sand	orange
FCN4799	18	2017	Huizuiwa	Lintao	17LH-T1-L21	H3	Ceramic sherd	ceramic	body	9.5	plain	Xindian	medium sand	orange
FCN4799	21	2017	Huizuiwa	Lintao	17LH-T1-L21	H3	Ceramic sherd	ceramic	body	21.2	plain	Xindian	coarse sand	orange
FCN4799	5	2017	Huizuiwa	Lintao	17LH-T1-L21	H3	Ceramic sherd	ceramic	body	26.9	slip	Xindian	medium sand	grey
FCN4799	23	2017	Huizuiwa	Lintao	17LH-T1-L21	H3	Ceramic sherd	ceramic	body	1.2	slip	Xindian	fine	orange
FCN4799	15	2017	Huizuiwa	Lintao	17LH-T1-L21	H3	Ceramic sherd	ceramic	body	20.6	slip	Xindian	coarse sand	brown
FCN4799	4	2017	Huizuiwa	Lintao	17LH-T1-L21	H3	Ceramic sherd	ceramic	body	26.9	slip + black pigment	Xindian	medium sand	orange
FCN4799	24	2017	Huizuiwa	Lintao	17LH-T1-L21	H3	Ceramic sherd	ceramic	body	1	slip + black pigment	Xindian	fine	orange
FCN4799	3	2017	Huizuiwa	Lintao	17LH-T1-L21	H3	Ceramic sherd	ceramic	body	20.7	slip + black pigment	Xindian	fine sand	grey
FCN4799	8	2017	Huizuiwa	Lintao	17LH-T1-L21	H3	Ceramic sherd	ceramic	body	10.3	slip + black pigment	Xindian	fine sand	orange
FCN4799	1	2017	Huizuiwa	Lintao	17LH-T1-L21	H3	Ceramic sherd	ceramic	body	21	slip + black pigment	Xindian	fine sand	orange yellow
FCN4799	7	2017	Huizuiwa	Lintao	17LH-T1-L21	H3	Ceramic sherd	ceramic	body	9	slip + black pigment + red pigment	Xindian	fine sand	grey
FCN4799	9	2017	Huizuiwa	Lintao	17LH-T1-L21	H3	Ceramic sherd	ceramic	body	9.8	slip + fine cordmarked	Xindian	fine sand	brown
FCN5006	16	2017	Huizuiwa	Lintao	17LH-T1-L22	H3	Ceramic sherd	ceramic	body	8.4	appliqué	Xindian	medium sand	red
FCN5006	35	2017	Huizuiwa	Lintao	17LH-T1-L22	H3	Ceramic sherd	ceramic	body	6.5	appliqué	Xindian	fine	grey
FCN5006	21	2017	Huizuiwa	Lintao	17LH-T1-L22	H3	Ceramic sherd	ceramic	body	13.4	appliqué	Xindian	fine sand	orange
FCN5006	51	2017	Huizuiwa	Lintao	17LH-T1-L22	H3	Ceramic sherd	ceramic	body	2.7	black pigment	Xindian	medium sand	orange (grey core)
FCN5006	4	2017	Huizuiwa	Lintao	17LH-T1-L22	H3	Ceramic sherd	ceramic	body	44.2	fine cordmarked	Xindian	medium sand	grey
FCN5006	11	2017	Huizuiwa	Lintao	17LH-T1-L22	H3	Ceramic sherd	ceramic	body	13.7	fine cordmarked	Xindian	medium sand	grey (brown core)
FCN5006	5	2017	Huizuiwa	Lintao	17LH-T1-L22	H3	Ceramic sherd	ceramic	body	24.1	fine cordmarked	Xindian	medium sand	orange yellow
FCN5006	41	2017	Huizuiwa	Lintao	17LH-T1-L22	H3	Ceramic sherd	ceramic	body	4.6	fine cordmarked	Xindian	fine	light brown (grey core)
FCN5006	37	2017	Huizuiwa	Lintao	17LH-T1-L22	H3	Ceramic sherd	ceramic	body	4.7	fine cordmarked	Xindian	fine	orange
FCN5006	44	2017	Huizuiwa	Lintao	17LH-T1-L22	H3	Ceramic sherd	ceramic	body	5.4	fine cordmarked	Xindian	fine sand	grey brown
FCN5006	47	2017	Huizuiwa	Lintao	17LH-T1-L22	H3	Ceramic sherd	ceramic	body	3.3	fine cordmarked	Xindian	fine sand	grey brown
FCN5006	7	2017	Huizuiwa	Lintao	17LH-T1-L22	H3	Ceramic sherd	ceramic	body	11.1	fine cordmarked	Xindian	fine sand	orange
FCN5006	6	2017	Huizuiwa	Lintao	17LH-T1-L22	H3	Ceramic sherd	ceramic	body	14.6	fine cordmarked	Xindian	fine sand	orange yellow
FCN5006	40	2017	Huizuiwa	Lintao	17LH-T1-L22	H3	Ceramic sherd	ceramic	body	6.7	fine cordmarked	Xindian	coarse sand	orange (grey core)
FCN5006	39	2017	Huizuiwa	Lintao	17LH-T1-L22	H3	Ceramic sherd	ceramic	body	6.5	slip + fine cordmarked	Xindian	fine sand	orange (grey core)
FCN5006	45	2017	Huizuiwa	Lintao	17LH-T1-L22	H3	Ceramic sherd	ceramic	body	3.1	plain	Xindian	medium sand	grey
FCN5006	2	2017	Huizuiwa	Lintao	17LH-T1-L22	H3	Ceramic sherd	ceramic	body	33	plain	Xindian	medium sand	grey (brown core)
FCN5006	3	2017	Huizuiwa	Lintao	17LH-T1-L22	H3	Ceramic sherd	ceramic	body	42.7	plain	Xindian	medium sand	grey (brown core)
FCN5006	1	2017	Huizuiwa	Lintao	17LH-T1-L22	H3	Ceramic sherd	ceramic	body	62	plain	Xindian	medium sand	orange
FCN5006	23	2017	Huizuiwa	Lintao	17LH-T1-L22	H3	Ceramic sherd	ceramic	body	19.1	plain	Xindian	medium sand	orange (brown)
FCN5006	48	2017	Huizuiwa	Lintao	17LH-T1-L22	H3	Ceramic sherd	ceramic	body	2.2	plain	Xindian	fine	light brown
FCN5006	28	2017	Huizuiwa	Lintao	17LH-T1-L22	H3	Ceramic sherd	ceramic	body	4.5	plain	Xindian	fine	light brown (grey core)
FCN5006	13	2017	Huizuiwa	Lintao	17LH-T1-L22	H3	Ceramic sherd	ceramic	body	7.7	plain	Xindian	fine	grey
FCN5006	14	2017	Huizuiwa	Lintao	17LH-T1-L22	H3	Ceramic sherd	ceramic	body	8.2	plain	Xindian	fine	orange
FCN5006	49	2017	Huizuiwa	Lintao	17LH-T1-L22	H3	Ceramic sherd	ceramic	body	2	plain	Xindian	fine	orange
FCN5006	46	2017	Huizuiwa	Lintao	17LH-T1-L22	H3	Ceramic sherd	ceramic	body	3.1	plain	Xindian	fine sand	grey brown
FCN5006	24	2017	Huizuiwa	Lintao	17LH-T1-L22	H3	Ceramic sherd	ceramic	body	11.6	plain	Xindian	fine sand	orange
FCN5006	26	2017	Huizuiwa	Lintao	17LH-T1-L22	H3	Ceramic sherd	ceramic	body	11.4	plain	Xindian	fine sand	orange
FCN5006	9	2017	Huizuiwa	Lintao	17LH-T1-L22	H3	Ceramic sherd	ceramic	handle	14.6	plain	Xindian	fine sand	orange yellow (grey)
FCN5006	27	2017	Huizuiwa	Lintao	17LH-T1-L22	H3	Ceramic sherd	ceramic	body	11.3	plain	Xindian	coarse sand	orange yellow
FCN5006	20	2017	Huizuiwa	Lintao	17LH-T1-L22	H3	Ceramic sherd	ceramic	body	14.6	slip	Xindian	medium sand	orange (grey core)
FCN5006	31	2017	Huizuiwa	Lintao	17LH-T1-L22	H3	Ceramic sherd	ceramic	body	11.7	slip	Xindian	fine sand	orange
FCN5006	32	2017	Huizuiwa	Lintao	17LH-T1-L22	H3	Ceramic sherd	ceramic	body	4.6	slip	Xindian	coarse sand	orange
FCN5006	12	2017	Huizuiwa	Lintao	17LH-T1-L22	H3	Ceramic sherd	ceramic	body	12.1	slip + black pigment	Xindian	medium sand	light brown
FCN5006	29	2017	Huizuiwa	Lintao	17LH-T1-L22	H3	Ceramic sherd	ceramic	body	7.6	slip + black pigment	Xindian	medium sand	orange (grey core)
FCN5006	17	2017	Huizuiwa	Lintao	17LH-T1-L22	H3	Ceramic sherd	ceramic	body	9	slip + black pigment	Xindian	fine	light brown (grey core)
FCN5006	18	2017	Huizuiwa	Lintao	17LH-T1-L22	H3	Ceramic sherd	ceramic	body	5	slip + black pigment	Xindian	fine	light brown (grey core)
FCN5006	25	2017	Huizuiwa	Lintao	17LH-T1-L22	H3	Ceramic sherd	ceramic	body	8.5	slip + black pigment	Xindian	fine	light brown (grey core)
FCN5006	36	2017	Huizuiwa	Lintao	17LH-T1-L22	H3	Ceramic sherd	ceramic	body	2.9	slip + black pigment	Xindian	fine	light brown (grey core)
FCN5006	42	2017	Huizuiwa	Lintao	17LH-T1-L22	H3	Ceramic sherd	ceramic	body	2.5	slip + black pigment	Xindian	fine	light brown (grey core)
FCN5006	10	2017	Huizuiwa	Lintao	17LH-T1-L22	H3	Ceramic sherd	ceramic	body	5.3	slip + black pigment	Xindian	fine	grey
FCN5006	30	2017	Huizuiwa	Lintao	17LH-T1-L22	H3	Ceramic sherd	ceramic	body	5.2	slip + black pigment	Xindian	fine	grey
FCN5006	38	2017	Huizuiwa	Lintao	17LH-T1-L22	H3	Ceramic sherd	ceramic	body	2.7	slip + black pigment	Xindian	fine	grey
FCN5006	43	2017	Huizuiwa	Lintao	17LH-T1-L22	H3	Ceramic sherd	ceramic	body	3	slip + black pigment	Xindian	fine	orange (grey core)
FCN5006	15	2017	Huizuiwa	Lintao	17LH-T1-L22	H3	Ceramic sherd	ceramic	body	15.3	slip + black pigment	Xindian	fine sand	light brown
FCN5006	8	2017	Huizuiwa	Lintao	17LH-T1-L22	H3	Ceramic sherd	ceramic	body	10.1	slip + black pigment	Xindian	fine sand	orange
FCN5006	50	2017	Huizuiwa	Lintao	17LH-T1-L22	H3	Ceramic sherd	ceramic	body	4	slip + black pigment	Xindian	coarse sand	orange
FCN5006	19	2017	Huizuiwa	Lintao	17LH-T1-L22	H3	Ceramic sherd	ceramic	body	18.4	slip + black pigment	Xindian	coarse sand	orange (grey core)
FCN5006	33	2017	Huizuiwa	Lintao	17LH-T1-L22	H3	Ceramic sherd	ceramic	body	4.3	slip + black pigment + red pigment	Xindian	fine	orange
FCN5006	22	2017	Huizuiwa	Lintao	17LH-T1-L22	H3	Ceramic sherd	ceramic	body	21.4	slip + fine cordmarked	Xindian	coarse sand	grey
FCN5006	34	2017	Huizuiwa	Lintao	17LH-T1-L22	H3	Ceramic sherd	ceramic	body	4.8	slip + red pigment	Xindian	medium sand	orange (grey core)
FCN5011	17	2017	Huizuiwa	Lintao	17LH-T1-L23	H4	Ceramic sherd	ceramic	body	42	black pigment	Xindian	medium sand	brown
FCN5011	38	2017	Huizuiwa	Lintao	17LH-T1-L23	H4	Ceramic sherd	ceramic	body	10	black pigment	Xindian	medium sand	light brown
FCN5011	79	2017	Huizuiwa	Lintao	17LH-T1-L23	H4	Ceramic sherd	ceramic	body	0.9	black pigment	Xindian	medium sand	grey
FCN5011	8	2017	Huizuiwa	Lintao	17LH-T1-L23	H4	Ceramic sherd	ceramic	body	12.7	black pigment	Xindian	medium sand	orange
FCN5011	12	2017	Huizuiwa	Lintao	17LH-T1-L23	H4	Ceramic sherd	ceramic	body	15.7	black pigment	Xindian	medium sand	orange
FCN5011	71	2017	Huizuiwa	Lintao	17LH-T1-L23	H4	Ceramic sherd	ceramic	body	3.5	black pigment	Xindian	medium sand	orange
FCN5011	74	2017	Huizuiwa	Lintao	17LH-T1-L23	H4	Ceramic sherd	ceramic	body	2.4	black pigment	Xindian	medium sand	orange
FCN5011	5	2017	Huizuiwa	Lintao	17LH-T1-L23	H4	Ceramic sherd	ceramic	body	49.1	black pigment	Xindian	medium sand	orange yellow
FCN5011	6	2017	Huizuiwa	Lintao	17LH-T1-L23	H4	Ceramic sherd	ceramic	body	16.5	black pigment	Xindian	medium sand	orange yellow
FCN5011	57	2017	Huizuiwa	Lintao	17LH-T1-L23	H4	Ceramic sherd	ceramic	body	13.6	black pigment	Xindian	medium sand	orange yellow
FCN5011	64	2017	Huizuiwa	Lintao	17LH-T1-L23	H4	Ceramic sherd	ceramic	body	2.2	black pigment	Xindian	fine	grey
FCN5011	33	2017	Huizuiwa	Lintao	17LH-T1-L23	H4	Ceramic sherd	ceramic	body	2.5	black pigment	Xindian	fine	orange yellow
FCN5011	39	2017	Huizuiwa	Lintao	17LH-T1-L23	H4	Ceramic sherd	ceramic	body	4.7	black pigment	Xindian	fine	orange yellow
FCN5011	66	2017	Huizuiwa	Lintao	17LH-T1-L23	H4	Ceramic sherd	ceramic	body	1.8	black pigment	Xindian	fine	orange yellow
FCN5011	77	2017	Huizuiwa	Lintao	17LH-T1-L23	H4	Ceramic sherd	ceramic	body	1	black pigment	Xindian	fine	orange yellow
FCN5011	35	2017	Huizuiwa	Lintao	17LH-T1-L23	H4	Ceramic sherd	ceramic	body	5.1	black pigment	Xindian	fine sand	orange
FCN5011	51	2017	Huizuiwa	Lintao	17LH-T1-L23	H4	Ceramic sherd	ceramic	body	6.1	black pigment	Xindian	fine sand	orange
FCN5011	70	2017	Huizuiwa	Lintao	17LH-T1-L23	H4	Ceramic sherd	ceramic	body	1.5	black pigment	Xindian	fine sand	orange
FCN5011	14	2017	Huizuiwa	Lintao	17LH-T1-L23	H4	Ceramic sherd	ceramic	body	6.8	black pigment	Xindian	fine sand	orange yellow
FCN5011	16	2017	Huizuiwa	Lintao	17LH-T1-L23	H4	Ceramic sherd	ceramic	body	16.3	black pigment	Xindian	fine sand	orange yellow
FCN5011	43	2017	Huizuiwa	Lintao	17LH-T1-L23	H4	Ceramic sherd	ceramic	body	11.5	black pigment	Xindian	fine sand	orange yellow
FCN5011	78	2017	Huizuiwa	Lintao	17LH-T1-L23	H4	Ceramic sherd	ceramic	body	1.1	black pigment	Xindian	fine sand	orange yellow
FCN5011	11	2017	Huizuiwa	Lintao	17LH-T1-L23	H4	Ceramic sherd	ceramic	body	13.5	black pigment	Xindian	fine sand	orange yellow
FCN5011	62	2017	Huizuiwa	Lintao	17LH-T1-L23	H4	Ceramic sherd	ceramic	body	2	black pigment + red pigment	Xindian	fine sand	orange
FCN5011	42	2017	Huizuiwa	Lintao	17LH-T1-L23	H4	Ceramic sherd	ceramic	body	13.1	cordmarked	Xindian	medium sand	light brown
FCN5011	18	2017	Huizuiwa	Lintao	17LH-T1-L23	H4	Ceramic sherd	ceramic	body	26.2	cordmarked	Xindian	medium sand	orange
FCN5011	22	2017	Huizuiwa	Lintao	17LH-T1-L23	H4	Ceramic sherd	ceramic	body	12.9	crossed cordmarked	Xindian	medium sand	orange
FCN5011	26	2017	Huizuiwa	Lintao	17LH-T1-L23	H4	Ceramic sherd	ceramic	body	6.1	fine cordmarked	Xindian	medium sand	grey
FCN5011	68	2017	Huizuiwa	Lintao	17LH-T1-L23	H4	Ceramic sherd	ceramic	body	2.9	fine cordmarked	Xindian	medium sand	grey
FCN5011	1	2017	Huizuiwa	Lintao	17LH-T1-L23	H4	Ceramic sherd	ceramic	body	71.6	fine cordmarked	Xindian	medium sand	orange
FCN5011	2	2017	Huizuiwa	Lintao	17LH-T1-L23	H4	Ceramic sherd	ceramic	body	91.4	fine cordmarked	Xindian	medium sand	orange
FCN5011	3	2017	Huizuiwa	Lintao	17LH-T1-L23	H4	Ceramic sherd	ceramic	body	33.5	fine cordmarked	Xindian	medium sand	orange
FCN5011	28	2017	Huizuiwa	Lintao	17LH-T1-L23	H4	Ceramic sherd	ceramic	body	6	fine cordmarked	Xindian	medium sand	orange
FCN5011	36	2017	Huizuiwa	Lintao	17LH-T1-L23	H4	Ceramic sherd	ceramic	body	6	fine cordmarked	Xindian	medium sand	orange
FCN5011	40	2017	Huizuiwa	Lintao	17LH-T1-L23	H4	Ceramic sherd	ceramic	body	11.6	fine cordmarked	Xindian	medium sand	orange
FCN5011	58	2017	Huizuiwa	Lintao	17LH-T1-L23	H4	Ceramic sherd	ceramic	body	8.6	fine cordmarked	Xindian	medium sand	orange
FCN5011	61	2017	Huizuiwa	Lintao	17LH-T1-L23	H4	Ceramic sherd	ceramic	body	6.3	fine cordmarked	Xindian	medium sand	orange
FCN5011	15	2017	Huizuiwa	Lintao	17LH-T1-L23	H4	Ceramic sherd	ceramic	base	44.3	fine cordmarked	Xindian	medium sand	orange
FCN5011	7	2017	Huizuiwa	Lintao	17LH-T1-L23	H4	Ceramic sherd	ceramic	body	14	fine cordmarked	Xindian	medium sand	orange yellow
FCN5011	29	2017	Huizuiwa	Lintao	17LH-T1-L23	H4	Ceramic sherd	ceramic	body	5.4	fine cordmarked	Xindian	medium sand	orange yellow
FCN5011	47	2017	Huizuiwa	Lintao	17LH-T1-L23	H4	Ceramic sherd	ceramic	body	13.6	fine cordmarked	Xindian	medium sand	orange yellow
FCN5011	48	2017	Huizuiwa	Lintao	17LH-T1-L23	H4	Ceramic sherd	ceramic	body	6.6	fine cordmarked	Xindian	medium sand	orange yellow
FCN5011	59	2017	Huizuiwa	Lintao	17LH-T1-L23	H4	Ceramic sherd	ceramic	body	7	fine cordmarked	Xindian	medium sand	orange yellow
FCN5011	75	2017	Huizuiwa	Lintao	17LH-T1-L23	H4	Ceramic sherd	ceramic	body	2.9	fine cordmarked	Xindian	fine	grey
FCN5011	53	2017	Huizuiwa	Lintao	17LH-T1-L23	H4	Ceramic sherd	ceramic	body	6.6	fine cordmarked	Xindian	fine sand	brown
FCN5011	23	2017	Huizuiwa	Lintao	17LH-T1-L23	H4	Ceramic sherd	ceramic	body	7.2	fine cordmarked	Xindian	fine sand	orange
FCN5011	24	2017	Huizuiwa	Lintao	17LH-T1-L23	H4	Ceramic sherd	ceramic	body	5.9	fine cordmarked	Xindian	fine sand	orange
FCN5011	56	2017	Huizuiwa	Lintao	17LH-T1-L23	H4	Ceramic sherd	ceramic	body	7	slip + black pigment + fine cordmarked	Xindian	medium sand	orange yellow
FCN5011	13	2017	Huizuiwa	Lintao	17LH-T1-L23	H4	Ceramic sherd	ceramic	body	8.3	line incisions	Xindian	fine sand	orange yellow
FCN5011	31	2017	Huizuiwa	Lintao	17LH-T1-L23	H4	Ceramic sherd	ceramic	handle	5.5	plain	Xindian	medium sand	brown
FCN5011	20	2017	Huizuiwa	Lintao	17LH-T1-L23	H4	Ceramic sherd	ceramic	body	11.6	plain	Xindian	medium sand	orange
FCN5011	32	2017	Huizuiwa	Lintao	17LH-T1-L23	H4	Ceramic sherd	ceramic	body	6.6	plain	Xindian	medium sand	orange
FCN5011	49	2017	Huizuiwa	Lintao	17LH-T1-L23	H4	Ceramic sherd	ceramic	body	8	plain	Xindian	medium sand	orange
FCN5011	60	2017	Huizuiwa	Lintao	17LH-T1-L23	H4	Ceramic sherd	ceramic	body	6	plain	Xindian	medium sand	orange
FCN5011	55	2017	Huizuiwa	Lintao	17LH-T1-L23	H4	Ceramic sherd	ceramic	body	6.4	plain	Xindian	medium sand	orange
FCN5011	44	2017	Huizuiwa	Lintao	17LH-T1-L23	H4	Ceramic sherd	ceramic	body	12.4	plain	Xindian	medium sand	orange yellow
FCN5011	72	2017	Huizuiwa	Lintao	17LH-T1-L23	H4	Ceramic sherd	ceramic	body	1.8	plain	Xindian	fine	brown
FCN5011	76	2017	Huizuiwa	Lintao	17LH-T1-L23	H4	Ceramic sherd	ceramic	body	1.7	plain	Xindian	fine	grey
FCN5011	30	2017	Huizuiwa	Lintao	17LH-T1-L23	H4	Ceramic sherd	ceramic	body	12	plain	Xindian	fine	orange yellow
FCN5011	69	2017	Huizuiwa	Lintao	17LH-T1-L23	H4	Ceramic sherd	ceramic	body	3.2	plain	Xindian	fine sand	orange
FCN5011	65	2017	Huizuiwa	Lintao	17LH-T1-L23	H4	Ceramic sherd	ceramic	handle	3.4	plain	Xindian	fine sand	orange
FCN5011	67	2017	Huizuiwa	Lintao	17LH-T1-L23	H4	Ceramic sherd	ceramic	handle	2.6	plain	Xindian	fine sand	orange
FCN5011	73	2017	Huizuiwa	Lintao	17LH-T1-L23	H4	Ceramic sherd	ceramic	handle	2.6	plain	Xindian	fine sand	orange
FCN5011	37	2017	Huizuiwa	Lintao	17LH-T1-L23	H4	Ceramic sherd	ceramic	body	9.6	plain	Xindian	fine sand	orange yellow
FCN5011	46	2017	Huizuiwa	Lintao	17LH-T1-L23	H4	Ceramic sherd	ceramic	body	16.6	plain	Xindian	coarse sand	orange
FCN5011	80	2017	Huizuiwa	Lintao	17LH-T1-L23	H4	Ceramic sherd	ceramic	body	5.9	plain	Xindian	medium sand	grey brown
FCN5011	41	2017	Huizuiwa	Lintao	17LH-T1-L23	H4	Ceramic sherd	ceramic	body	3.4	polish	Xindian	fine sand	orange yellow
FCN5011	4	2017	Huizuiwa	Lintao	17LH-T1-L23	H4	Ceramic sherd	ceramic	body	41.6	slip	Xindian	medium sand	orange
FCN5011	19	2017	Huizuiwa	Lintao	17LH-T1-L23	H4	Ceramic sherd	ceramic	body	6.6	slip	Xindian	fine	brown
FCN5011	21	2017	Huizuiwa	Lintao	17LH-T1-L23	H4	Ceramic sherd	ceramic	body	14.2	slip + black pigment	Xindian	medium sand	grey
FCN5011	25	2017	Huizuiwa	Lintao	17LH-T1-L23	H4	Ceramic sherd	ceramic	body	13.3	slip + black pigment	Xindian	medium sand	grey
FCN5011	63	2017	Huizuiwa	Lintao	17LH-T1-L23	H4	Ceramic sherd	ceramic	body	3.4	slip + black pigment	Xindian	medium sand	grey
FCN5011	27	2017	Huizuiwa	Lintao	17LH-T1-L23	H4	Ceramic sherd	ceramic	body	8.6	slip + black pigment	Xindian	medium sand	orange
FCN5011	45	2017	Huizuiwa	Lintao	17LH-T1-L23	H4	Ceramic sherd	ceramic	body	7.3	slip + black pigment	Xindian	medium sand	red
FCN5011	9	2017	Huizuiwa	Lintao	17LH-T1-L23	H4	Ceramic sherd	ceramic	body	19.9	slip + black pigment	Xindian	fine sand	orange
FCN5011	54	2017	Huizuiwa	Lintao	17LH-T1-L23	H4	Ceramic sherd	ceramic	body	3.4	slip + black pigment	Xindian	fine sand	orange
FCN5011	10	2017	Huizuiwa	Lintao	17LH-T1-L23	H4	Ceramic sherd	ceramic	body	23.8	slip + black pigment	Xindian	fine sand	orange yellow
FCN5011	52	2017	Huizuiwa	Lintao	17LH-T1-L23	H4	Ceramic sherd	ceramic	body	7	slip + black pigment	Xindian	fine sand	orange yellow
FCN5011	50	2017	Huizuiwa	Lintao	17LH-T1-L23	H4	Ceramic sherd	ceramic	body	3.9	slip + black pigment + red pigment	Xindian	fine sand	orange yellow
FCN5011	34	2017	Huizuiwa	Lintao	17LH-T1-L23	H4	Ceramic sherd	ceramic	body	30.3	slip + red pigment	Xindian	medium sand	brown
FCN5016	11	2017	Huizuiwa	Lintao	17LH-T1-L24	Layer 4	Ceramic sherd	ceramic	body	3.9	appliqué	Xindian	fine	brown
FCN5016	8	2017	Huizuiwa	Lintao	17LH-T1-L24	Layer 4	Ceramic sherd	ceramic	body	5	black pigment	Xindian	fine	orange (grey core)
FCN5016	13	2017	Huizuiwa	Lintao	17LH-T1-L24	Layer 4	Ceramic sherd	ceramic	body	1.1	black pigment	Xindian	fine sand	orange
FCN5016	1	2017	Huizuiwa	Lintao	17LH-T1-L24	Layer 4	Ceramic sherd	ceramic	body	45.2	black pigment + white pigment	Xindian	coarse sand	orange (grey core)
FCN5016	12	2017	Huizuiwa	Lintao	17LH-T1-L24	Layer 4	Ceramic sherd	ceramic	body	2.9	fine cordmarked	Xindian	fine	orange
FCN5016	5	2017	Huizuiwa	Lintao	17LH-T1-L24	Layer 4	Ceramic sherd	ceramic	body	5.1	fine cordmarked	Xindian	fine sand	grey brown
FCN5016	14	2017	Huizuiwa	Lintao	17LH-T1-L24	Layer 4	Ceramic sherd	ceramic	body	11.8	fine cordmarked	Xindian	coarse sand	orange (grey core)
FCN5016	3	2017	Huizuiwa	Lintao	17LH-T1-L24	Layer 4	Ceramic sherd	ceramic	body	6.1	fine cordmarked + appliqué	Xindian	fine sand	orange yellow
FCN5016	10	2017	Huizuiwa	Lintao	17LH-T1-L24	Layer 4	Ceramic sherd	ceramic	body	2.6	plain	Xindian	fine	light brown
FCN5016	9	2017	Huizuiwa	Lintao	17LH-T1-L24	Layer 4	Ceramic sherd	ceramic	body	3.5	plain	Xindian	fine sand	orange
FCN5016	4	2017	Huizuiwa	Lintao	17LH-T1-L24	Layer 4	Ceramic sherd	ceramic	body	5	plain	Xindian	fine sand	orange yellow
FCN5016	6	2017	Huizuiwa	Lintao	17LH-T1-L24	Layer 4	Ceramic sherd	ceramic	body	7.2	plain	Xindian	coarse sand	orange (grey core)
FCN5016	2	2017	Huizuiwa	Lintao	17LH-T1-L24	Layer 4	Ceramic sherd	ceramic	body	19.2	slip + black pigment	Xindian	medium sand	orange
FCN5016	7	2017	Huizuiwa	Lintao	17LH-T1-L24	Layer 4	Ceramic sherd	ceramic	handle	5.4	slip + black pigment	Xindian	fine	orange
FCN5022	25	2017	Huizuiwa	Lintao	17LH-T1-L26	H4	Ceramic sherd	ceramic	body	2.9	appliqué	Xindian	medium sand	orange (grey core)
FCN5022	22	2017	Huizuiwa	Lintao	17LH-T1-L26	H4	Ceramic sherd	ceramic	body	10.3	black pigment	Xindian	medium sand	grey
FCN5022	7	2017	Huizuiwa	Lintao	17LH-T1-L26	H4	Ceramic sherd	ceramic	body	17.2	black pigment	Xindian	medium sand	orange
FCN5022	37	2017	Huizuiwa	Lintao	17LH-T1-L26	H4	Ceramic sherd	ceramic	body	5.4	black pigment	Xindian	medium sand	orange
FCN5022	38	2017	Huizuiwa	Lintao	17LH-T1-L26	H4	Ceramic sherd	ceramic	handle	2.5	black pigment	Xindian	medium sand	orange
FCN5022	40	2017	Huizuiwa	Lintao	17LH-T1-L26	H4	Ceramic sherd	ceramic	body	1.7	black pigment	Xindian	medium sand	yellow brown
FCN5022	23	2017	Huizuiwa	Lintao	17LH-T1-L26	H4	Ceramic sherd	ceramic	body	3.8	black pigment	Xindian	fine
FCN5022	4	2017	Huizuiwa	Lintao	17LH-T1-L26	H4	Ceramic sherd	ceramic	body	15.9	black pigment	Xindian	fine sand	orange yellow
FCN5022	28	2017	Huizuiwa	Lintao	17LH-T1-L26	H4	Ceramic sherd	ceramic	body	4.5	cordmarked	Xindian	medium sand	grey
FCN5022	14	2017	Huizuiwa	Lintao	17LH-T1-L26	H4	Ceramic sherd	ceramic	body	11.7	fine cordmarked	Xindian	medium sand	brown
FCN5022	15	2017	Huizuiwa	Lintao	17LH-T1-L26	H4	Ceramic sherd	ceramic	body	6.4	fine cordmarked	Xindian	medium sand	brown
FCN5022	5	2017	Huizuiwa	Lintao	17LH-T1-L26	H4	Ceramic sherd	ceramic	handle	28.3	fine cordmarked	Xindian	medium sand	brown
FCN5022	2	2017	Huizuiwa	Lintao	17LH-T1-L26	H4	Ceramic sherd	ceramic	foot	52.9	fine cordmarked	Xindian	medium sand	brown
FCN5022	3	2017	Huizuiwa	Lintao	17LH-T1-L26	H4	Ceramic sherd	ceramic	foot	27.7	fine cordmarked	Xindian	medium sand	brown
FCN5022	29	2017	Huizuiwa	Lintao	17LH-T1-L26	H4	Ceramic sherd	ceramic	body	7.5	fine cordmarked	Xindian	medium sand	grey
FCN5022	39	2017	Huizuiwa	Lintao	17LH-T1-L26	H4	Ceramic sherd	ceramic	body	1.7	fine cordmarked	Xindian	medium sand	grey
FCN5022	17	2017	Huizuiwa	Lintao	17LH-T1-L26	H4	Ceramic sherd	ceramic	body	5.9	fine cordmarked	Xindian	medium sand	orange
FCN5022	30	2017	Huizuiwa	Lintao	17LH-T1-L26	H4	Ceramic sherd	ceramic	body	7.8	fine cordmarked	Xindian	medium sand	orange
FCN5022	33	2017	Huizuiwa	Lintao	17LH-T1-L26	H4	Ceramic sherd	ceramic	body	4.4	fine cordmarked	Xindian	medium sand	orange
FCN5022	31	2017	Huizuiwa	Lintao	17LH-T1-L26	H4	Ceramic sherd	ceramic	body	5.1	fine cordmarked	Xindian	medium sand	orange (grey core)
FCN5022	19	2017	Huizuiwa	Lintao	17LH-T1-L26	H4	Ceramic sherd	ceramic	body	4.1	fine cordmarked	Xindian	medium sand	orange yellow
FCN5022	35	2017	Huizuiwa	Lintao	17LH-T1-L26	H4	Ceramic sherd	ceramic	body	2.8	fine cordmarked	Xindian	medium sand	orange yellow
FCN5022	36	2017	Huizuiwa	Lintao	17LH-T1-L26	H4	Ceramic sherd	ceramic	body	5.3	fine cordmarked	Xindian	medium sand	yellow brown
FCN5022	18	2017	Huizuiwa	Lintao	17LH-T1-L26	H4	Ceramic sherd	ceramic	body	4.7	fine cordmarked	Xindian	fine sand	orange yellow
FCN5022	11	2017	Huizuiwa	Lintao	17LH-T1-L26	H4	Ceramic sherd	ceramic	body	14.1	fine cordmarked	Xindian	coarse sand	brown
FCN5022	8	2017	Huizuiwa	Lintao	17LH-T1-L26	H4	Ceramic sherd	ceramic	body	6.9	fine cordmarked	Xindian	coarse sand	orange
FCN5022	20	2017	Huizuiwa	Lintao	17LH-T1-L26	H4	Ceramic sherd	ceramic	body	5.8	fine cordmarked	Xindian	coarse sand	orange
FCN5022	1	2017	Huizuiwa	Lintao	17LH-T1-L26	H4	Ceramic sherd	ceramic	foot	137.1	fine cordmarked	Xindian	coarse sand	orange
FCN5022	24	2017	Huizuiwa	Lintao	17LH-T1-L26	H4	Ceramic sherd	ceramic	body	7.9	line incisions	Xindian	medium sand	orange yellow
FCN5022	34	2017	Huizuiwa	Lintao	17LH-T1-L26	H4	Ceramic sherd	ceramic	body	5.5	plain	Xindian	medium sand	light brown
FCN5022	6	2017	Huizuiwa	Lintao	17LH-T1-L26	H4	Ceramic sherd	ceramic	body	17.2	plain	Xindian	medium sand	orange
FCN5022	12	2017	Huizuiwa	Lintao	17LH-T1-L26	H4	Ceramic sherd	ceramic	body	9.6	plain	Xindian	medium sand	orange
FCN5022	27	2017	Huizuiwa	Lintao	17LH-T1-L26	H4	Ceramic sherd	ceramic	body	8.6	plain	Xindian	medium sand	orange
FCN5022	16	2017	Huizuiwa	Lintao	17LH-T1-L26	H4	Ceramic sherd	ceramic	body	12.1	plain	Xindian	medium sand	orange yellow
FCN5022	32	2017	Huizuiwa	Lintao	17LH-T1-L26	H4	Ceramic sherd	ceramic	body	8.4	plain	Xindian	medium sand	orange yellow
FCN5022	10	2017	Huizuiwa	Lintao	17LH-T1-L26	H4	Ceramic sherd	ceramic	body	14	plain	Xindian	coarse sand	brown
FCN5022	9	2017	Huizuiwa	Lintao	17LH-T1-L26	H4	Ceramic sherd	ceramic	body	22.6	slip + black pigment	Xindian	medium sand	light brown
FCN5022	26	2017	Huizuiwa	Lintao	17LH-T1-L26	H4	Ceramic sherd	ceramic	body	4.5	slip + black pigment	Xindian	medium sand	orange yellow
FCN5022	41	2017	Huizuiwa	Lintao	17LH-T1-L26	H4	Ceramic sherd	ceramic	body	0.7	slip + black pigment	Xindian	fine	orange
FCN5022	13	2017	Huizuiwa	Lintao	17LH-T1-L26	H4	Ceramic sherd	ceramic	body	10.6	slip + black pigment	Xindian	fine sand	orange
FCN5022	21	2017	Huizuiwa	Lintao	17LH-T1-L26	H4	Ceramic sherd	ceramic	body	6	slip + black pigment	Xindian	coarse sand	orange
FCN5029	13	2017	Huizuiwa	Lintao	17LH-T1-L27	H4	Ceramic sherd	ceramic	body	0.7	black pigment	Xindian	fine	orange
FCN5029	12	2017	Huizuiwa	Lintao	17LH-T1-L27	H4	Ceramic sherd	ceramic	body	1.4	fine cordmarked	Xindian	medium sand	orange
FCN5029	2	2017	Huizuiwa	Lintao	17LH-T1-L27	H4	Ceramic sherd	ceramic	body	6.1	fine cordmarked	Xindian	fine	light brown
FCN5029	3	2017	Huizuiwa	Lintao	17LH-T1-L27	H4	Ceramic sherd	ceramic	body	7.2	fine cordmarked	Xindian	fine	grey
FCN5029	10	2017	Huizuiwa	Lintao	17LH-T1-L27	H4	Ceramic sherd	ceramic	body	1	fine cordmarked	Xindian	fine	grey
FCN5029	4	2017	Huizuiwa	Lintao	17LH-T1-L27	H4	Ceramic sherd	ceramic	body	4.3	fine cordmarked	Xindian	fine	yellow brown
FCN5029	5	2017	Huizuiwa	Lintao	17LH-T1-L27	H4	Ceramic sherd	ceramic	body	8.2	fine cordmarked	Xindian	fine sand	grey
FCN5029	8	2017	Huizuiwa	Lintao	17LH-T1-L27	H4	Ceramic sherd	ceramic	body	1.2	plain	Xindian	fine	light brown
FCN5029	6	2017	Huizuiwa	Lintao	17LH-T1-L27	H4	Ceramic sherd	ceramic	body	2.2	plain	Xindian	fine sand	grey
FCN5029	14	2017	Huizuiwa	Lintao	17LH-T1-L27	H4	Ceramic sherd	ceramic	body	0.7	plain	Xindian	fine sand	orange
FCN5029	11	2017	Huizuiwa	Lintao	17LH-T1-L27	H4	Ceramic sherd	ceramic	body	3.4	plain	Xindian	coarse sand	orange
FCN5029	1	2017	Huizuiwa	Lintao	17LH-T1-L27	H4	Ceramic sherd	ceramic	body	38.9	slip + black pigment	Xindian	fine	light brown (grey core)
FCN5029	7	2017	Huizuiwa	Lintao	17LH-T1-L27	H4	Ceramic sherd	ceramic	body	1.5	slip + black pigment	Xindian	fine	orange (grey core)
FCN5029	9	2017	Huizuiwa	Lintao	17LH-T1-L27	H4	Ceramic sherd	ceramic	body	0.6	slip + black pigment	Xindian	fine	orange (grey core)
FCN5031	1	2017	Huizuiwa	Lintao	17LH-T1-L28	Layer 4	Ceramic sherd	ceramic	body	4.7	black pigment	Xindian	fine sand	orange
FCN5031	3	2017	Huizuiwa	Lintao	17LH-T1-L28	Layer 4	Ceramic sherd	ceramic	body	3.7	fine cordmarked	Xindian	fine	light brown
FCN5031	7	2017	Huizuiwa	Lintao	17LH-T1-L28	Layer 4	Ceramic sherd	ceramic	body	1	fine cordmarked	Xindian	fine	grey
FCN5031	5	2017	Huizuiwa	Lintao	17LH-T1-L28	Layer 4	Ceramic sherd	ceramic	body	2.3	plain	Xindian	medium sand	grey brown
FCN5031	6	2017	Huizuiwa	Lintao	17LH-T1-L28	Layer 4	Ceramic sherd	ceramic	body	0.8	plain	Xindian	fine sand	orange
FCN5031	4	2017	Huizuiwa	Lintao	17LH-T1-L28	Layer 4	Ceramic sherd	ceramic	handle	3.1	plain	Xindian	fine sand	red
FCN5031	2	2017	Huizuiwa	Lintao	17LH-T1-L28	Layer 4	Ceramic sherd	ceramic	body	2.4	red pigment	Xindian	fine	grey
FCN5034	27	2017	Huizuiwa	Lintao	17LH-T1-L29	H5	Ceramic sherd	ceramic	body	2.7	black pigment	Xindian	medium sand	orange (grey core)
FCN5034	26	2017	Huizuiwa	Lintao	17LH-T1-L29	H5	Ceramic sherd	ceramic	body	1.4	black pigment	Xindian	fine	light brown
FCN5034	28	2017	Huizuiwa	Lintao	17LH-T1-L29	H5	Ceramic sherd	ceramic	body	1.5	black pigment	Xindian	fine	orange (grey core)
FCN5034	31	2017	Huizuiwa	Lintao	17LH-T1-L29	H5	Ceramic sherd	ceramic	body	1.5	black pigment	Xindian	fine sand	light brown
FCN5034	35	2017	Huizuiwa	Lintao	17LH-T1-L29	H5	Ceramic sherd	ceramic	body	0.7	black pigment	Xindian	fine sand	orange
FCN5034	4	2017	Huizuiwa	Lintao	17LH-T1-L29	H5	Ceramic sherd	ceramic	body	26	black pigment	Xindian	coarse sand	orange
FCN5034	30	2017	Huizuiwa	Lintao	17LH-T1-L29	H5	Ceramic sherd	ceramic	body	2.4	black pigment + white pigment	Xindian	fine sand	light brown
FCN5034	12	2017	Huizuiwa	Lintao	17LH-T1-L29	H5	Ceramic sherd	ceramic	body	5.4	fine cordmarked	Xindian	medium sand	light brown
FCN5034	13	2017	Huizuiwa	Lintao	17LH-T1-L29	H5	Ceramic sherd	ceramic	body	5.3	fine cordmarked	Xindian	fine	light brown
FCN5034	29	2017	Huizuiwa	Lintao	17LH-T1-L29	H5	Ceramic sherd	ceramic	body	1.9	fine cordmarked	Xindian	fine	light brown
FCN5034	25	2017	Huizuiwa	Lintao	17LH-T1-L29	H5	Ceramic sherd	ceramic	body	2.5	fine cordmarked	Xindian	fine	orange
FCN5034	21	2017	Huizuiwa	Lintao	17LH-T1-L29	H5	Ceramic sherd	ceramic	body	5.7	fine cordmarked	Xindian	fine sand	orange (grey core)
FCN5034	7	2017	Huizuiwa	Lintao	17LH-T1-L29	H5	Ceramic sherd	ceramic	body	11.1	fine cordmarked	Xindian	fine sand	orange yellow
FCN5034	9	2017	Huizuiwa	Lintao	17LH-T1-L29	H5	Ceramic sherd	ceramic	body	18.6	fine cordmarked	Xindian	coarse sand	orange (grey core)
FCN5034	15	2017	Huizuiwa	Lintao	17LH-T1-L29	H5	Ceramic sherd	ceramic	body	7.1	black pigment + fine cordmarked	Xindian	medium sand	orange
FCN5034	3	2017	Huizuiwa	Lintao	17LH-T1-L29	H5	Ceramic sherd	ceramic	body	27.7	black pigment + fine cordmarked	Xindian	fine sand	grey (brown core)
FCN5034	10	2017	Huizuiwa	Lintao	17LH-T1-L29	H5	Ceramic sherd	ceramic	body	10.1	slip + fine cordmarked	Xindian	coarse sand	orange (grey core)
FCN5034	2	2017	Huizuiwa	Lintao	17LH-T1-L29	H5	Ceramic sherd	ceramic	body	38	slip + fine cordmarked	Xindian	coarse sand	red (grey brown)
FCN5034	14	2017	Huizuiwa	Lintao	17LH-T1-L29	H5	Ceramic sherd	ceramic	body	5.7	plain	Xindian	medium sand	grey (red core)
FCN5034	16	2017	Huizuiwa	Lintao	17LH-T1-L29	H5	Ceramic sherd	ceramic	body	4.5	plain	Xindian	medium sand	grey brown
FCN5034	33	2017	Huizuiwa	Lintao	17LH-T1-L29	H5	Ceramic sherd	ceramic	body	2.8	plain	Xindian	fine	grey (red core)
FCN5034	17	2017	Huizuiwa	Lintao	17LH-T1-L29	H5	Ceramic sherd	ceramic	body	4	plain	Xindian	fine	orange
FCN5034	36	2017	Huizuiwa	Lintao	17LH-T1-L29	H5	Ceramic sherd	ceramic	body	0.8	plain	Xindian	fine sand	brown
FCN5034	22	2017	Huizuiwa	Lintao	17LH-T1-L29	H5	Ceramic sherd	ceramic	body	6.1	plain	Xindian	fine sand	light brown
FCN5034	23	2017	Huizuiwa	Lintao	17LH-T1-L29	H5	Ceramic sherd	ceramic	body	2	plain	Xindian	fine sand	light brown (grey core)
FCN5034	24	2017	Huizuiwa	Lintao	17LH-T1-L29	H5	Ceramic sherd	ceramic	body	4.3	plain	Xindian	fine sand	grey brown
FCN5034	18	2017	Huizuiwa	Lintao	17LH-T1-L29	H5	Ceramic sherd	ceramic	body	4	plain	Xindian	fine sand	orange
FCN5034	34	2017	Huizuiwa	Lintao	17LH-T1-L29	H5	Ceramic sherd	ceramic	body	7.5	plain	Xindian	fine sand	orange yellow
FCN5034	11	2017	Huizuiwa	Lintao	17LH-T1-L29	H5	Ceramic sherd	ceramic	body	6.9	plain	Xindian	coarse sand	grey (red core)
FCN5034	8	2017	Huizuiwa	Lintao	17LH-T1-L29	H5	Ceramic sherd	ceramic	body	15.6	plain	Xindian	coarse sand	orange
FCN5034	19	2017	Huizuiwa	Lintao	17LH-T1-L29	H5	Ceramic sherd	ceramic	body	3.8	plain	Xindian	coarse sand	red (grey)
FCN5034	32	2017	Huizuiwa	Lintao	17LH-T1-L29	H5	Ceramic sherd	ceramic	body	1.8	slip	Xindian	fine	light brown
FCN5034	20	2017	Huizuiwa	Lintao	17LH-T1-L29	H5	Ceramic sherd	ceramic	body	4.1	slip + black pigment	Xindian	fine	grey brown
FCN5034	6	2017	Huizuiwa	Lintao	17LH-T1-L29	H5	Ceramic sherd	ceramic	body	8.5	slip + black pigment	Xindian	fine sand	grey (red core)
FCN5034	5	2017	Huizuiwa	Lintao	17LH-T1-L29	H5	Ceramic sherd	ceramic	body	9.9	slip + black pigment	Xindian	coarse sand	orange (grey core)
FCN5034	1	2017	Huizuiwa	Lintao	17LH-T1-L29	H5	Ceramic sherd	ceramic	body	74.9	slip + black pigment + fine cordmarked	Xindian	coarse sand	grey (red core)
FCN5040	20	2017	Huizuiwa	Lintao	17LH-T1-L30	H4	Ceramic sherd	ceramic	body	4	black pigment	Xindian	fine sand	orange
FCN5040	25	2017	Huizuiwa	Lintao	17LH-T1-L30	H4	Ceramic sherd	ceramic	body	1.8	black pigment	Xindian	fine sand	orange
FCN5040	13	2017	Huizuiwa	Lintao	17LH-T1-L30	H4	Ceramic sherd	ceramic	body	3.3	black pigment	Xindian	fine sand	orange yellow
FCN5040	26	2017	Huizuiwa	Lintao	17LH-T1-L30	H4	Ceramic sherd	ceramic	body	2	black pigment	Xindian	fine sand	orange yellow
FCN5040	7	2017	Huizuiwa	Lintao	17LH-T1-L30	H4	Ceramic sherd	ceramic	body	4.3	black pigment + red pigment + white pigment	Xindian	fine sand	light brown
FCN5040	18	2017	Huizuiwa	Lintao	17LH-T1-L30	H4	Ceramic sherd	ceramic	body	4.4	appliqué	Xindian	fine sand	orange yellow
FCN5040	9	2017	Huizuiwa	Lintao	17LH-T1-L30	H4	Ceramic sherd	ceramic	body	15.3	fine cordmarked	Xindian	medium sand	brown
FCN5040	1	2017	Huizuiwa	Lintao	17LH-T1-L30	H4	Ceramic sherd	ceramic	body	16.4	fine cordmarked	Xindian	medium sand	orange
FCN5040	5	2017	Huizuiwa	Lintao	17LH-T1-L30	H4	Ceramic sherd	ceramic	body	7.4	fine cordmarked	Xindian	medium sand	orange
FCN5040	8	2017	Huizuiwa	Lintao	17LH-T1-L30	H4	Ceramic sherd	ceramic	body	14.2	fine cordmarked	Xindian	medium sand	orange
FCN5040	27	2017	Huizuiwa	Lintao	17LH-T1-L30	H4	Ceramic sherd	ceramic	body	4.9	fine cordmarked	Xindian	medium sand	orange
FCN5040	38	2017	Huizuiwa	Lintao	17LH-T1-L30	H4	Ceramic sherd	ceramic	body	4.1	fine cordmarked	Xindian	medium sand	orange
FCN5040	32	2017	Huizuiwa	Lintao	17LH-T1-L30	H4	Ceramic sherd	ceramic	body	2.5	fine cordmarked	Xindian	fine sand	grey
FCN5040	6	2017	Huizuiwa	Lintao	17LH-T1-L30	H4	Ceramic sherd	ceramic	body	6.3	fine cordmarked	Xindian	fine sand	orange
FCN5040	11	2017	Huizuiwa	Lintao	17LH-T1-L30	H4	Ceramic sherd	ceramic	body	4.4	fine cordmarked	Xindian	fine sand	orange
FCN5040	24	2017	Huizuiwa	Lintao	17LH-T1-L30	H4	Ceramic sherd	ceramic	body	2	fine cordmarked	Xindian	fine sand	orange
FCN5040	29	2017	Huizuiwa	Lintao	17LH-T1-L30	H4	Ceramic sherd	ceramic	body	2.5	fine cordmarked	Xindian	fine sand	orange
FCN5040	34	2017	Huizuiwa	Lintao	17LH-T1-L30	H4	Ceramic sherd	ceramic	body	1.7	fine cordmarked	Xindian	fine sand	orange
FCN5040	35	2017	Huizuiwa	Lintao	17LH-T1-L30	H4	Ceramic sherd	ceramic	body	3.2	fine cordmarked	Xindian	fine sand	orange
FCN5040	23	2017	Huizuiwa	Lintao	17LH-T1-L30	H4	Ceramic sherd	ceramic	body	3.7	plain	Xindian	medium sand	grey
FCN5040	12	2017	Huizuiwa	Lintao	17LH-T1-L30	H4	Ceramic sherd	ceramic	body	8.4	plain	Xindian	medium sand	orange
FCN5040	22	2017	Huizuiwa	Lintao	17LH-T1-L30	H4	Ceramic sherd	ceramic	body	3.9	plain	Xindian	medium sand	orange
FCN5040	31	2017	Huizuiwa	Lintao	17LH-T1-L30	H4	Ceramic sherd	ceramic	body	2.2	plain	Xindian	fine	grey
FCN5040	15	2017	Huizuiwa	Lintao	17LH-T1-L30	H4	Ceramic sherd	ceramic	body	1.6	plain	Xindian	fine	orange
FCN5040	33	2017	Huizuiwa	Lintao	17LH-T1-L30	H4	Ceramic sherd	ceramic	body	1.9	plain	Xindian	fine	orange
FCN5040	19	2017	Huizuiwa	Lintao	17LH-T1-L30	H4	Ceramic sherd	ceramic	body	3.7	plain	Xindian	fine sand	orange
FCN5040	28	2017	Huizuiwa	Lintao	17LH-T1-L30	H4	Ceramic sherd	ceramic	body	1.8	plain	Xindian	fine sand	orange
FCN5040	21	2017	Huizuiwa	Lintao	17LH-T1-L30	H4	Ceramic sherd	ceramic	body	3	plain	Xindian	fine sand	orange yellow
FCN5040	4	2017	Huizuiwa	Lintao	17LH-T1-L30	H4	Ceramic sherd	ceramic	body	23.5	plain	Xindian	coarse sand	orange yellow
FCN5040	3	2017	Huizuiwa	Lintao	17LH-T1-L30	H4	Ceramic sherd	ceramic	body	11.3	slip	Xindian	medium sand	orange
FCN5040	36	2017	Huizuiwa	Lintao	17LH-T1-L30	H4	Ceramic sherd	ceramic	body	2.9	slip	Xindian	medium sand	orange
FCN5040	2	2017	Huizuiwa	Lintao	17LH-T1-L30	H4	Ceramic sherd	ceramic	body	5.4	slip	Xindian	medium sand	orange yellow
FCN5040	30	2017	Huizuiwa	Lintao	17LH-T1-L30	H4	Ceramic sherd	ceramic	body	1.2	slip	Xindian	fine	orange
FCN5040	14	2017	Huizuiwa	Lintao	17LH-T1-L30	H4	Ceramic sherd	ceramic	body	4.9	slip + black pigment	Xindian	medium sand	orange
FCN5040	10	2017	Huizuiwa	Lintao	17LH-T1-L30	H4	Ceramic sherd	ceramic	body	5.2	slip + black pigment	Xindian	medium sand	orange yellow
FCN5040	37	2017	Huizuiwa	Lintao	17LH-T1-L30	H4	Ceramic sherd	ceramic	body	1	slip + black pigment	Xindian	fine	grey
FCN5040	17	2017	Huizuiwa	Lintao	17LH-T1-L30	H4	Ceramic sherd	ceramic	body	8.2	slip + black pigment	Xindian	fine sand	orange
FCN5040	16	2017	Huizuiwa	Lintao	17LH-T1-L30	H4	Ceramic sherd	ceramic	body	4.9	slip + fine cordmarked	Xindian	fine sand	orange
FCN5043	5	2017	Huizuiwa	Lintao	17LH-T1-L31	H4	Ceramic sherd	ceramic	body	6	appliqué	Xindian	fine sand	light brown
FCN5043	1	2017	Huizuiwa	Lintao	17LH-T1-L31	H4	Ceramic sherd	ceramic	handle	101.6	appliqué + lines	Xindian	medium sand	light brown
FCN5043	30	2017	Huizuiwa	Lintao	17LH-T1-L31	H4	Ceramic sherd	ceramic	body	0.9	black pigment	Xindian	medium sand	orange
FCN5043	19	2017	Huizuiwa	Lintao	17LH-T1-L31	H4	Ceramic sherd	ceramic	body	1.8	black pigment	Xindian	fine sand	light brown
FCN5043	23	2017	Huizuiwa	Lintao	17LH-T1-L31	H4	Ceramic sherd	ceramic	body	2.1	black pigment	Xindian	fine sand	light brown
FCN5043	2	2017	Huizuiwa	Lintao	17LH-T1-L31	H4	Ceramic sherd	ceramic	body	7.6	black pigment	Xindian	fine sand	light brown (grey core)
FCN5043	8	2017	Huizuiwa	Lintao	17LH-T1-L31	H4	Ceramic sherd	ceramic	body	7.5	black pigment	Xindian	fine sand	orange
FCN5043	12	2017	Huizuiwa	Lintao	17LH-T1-L31	H4	Ceramic sherd	ceramic	body	3.1	black pigment	Xindian	fine sand	orange
FCN5043	21	2017	Huizuiwa	Lintao	17LH-T1-L31	H4	Ceramic sherd	ceramic	body	3.4	fine cordmarked	Xindian	medium sand	light brown
FCN5043	25	2017	Huizuiwa	Lintao	17LH-T1-L31	H4	Ceramic sherd	ceramic	body	2.2	fine cordmarked	Xindian	medium sand	light brown
FCN5043	28	2017	Huizuiwa	Lintao	17LH-T1-L31	H4	Ceramic sherd	ceramic	body	2.4	fine cordmarked	Xindian	medium sand	light brown
FCN5043	10	2017	Huizuiwa	Lintao	17LH-T1-L31	H4	Ceramic sherd	ceramic	body	4.3	fine cordmarked	Xindian	medium sand	grey
FCN5043	22	2017	Huizuiwa	Lintao	17LH-T1-L31	H4	Ceramic sherd	ceramic	body	2.9	fine cordmarked	Xindian	medium sand	grey (brown core)
FCN5043	13	2017	Huizuiwa	Lintao	17LH-T1-L31	H4	Ceramic sherd	ceramic	body	6.1	fine cordmarked	Xindian	medium sand	grey (brown core)
FCN5043	20	2017	Huizuiwa	Lintao	17LH-T1-L31	H4	Ceramic sherd	ceramic	body	3.8	fine cordmarked	Xindian	medium sand	orange (brown)
FCN5043	3	2017	Huizuiwa	Lintao	17LH-T1-L31	H4	Ceramic sherd	ceramic	body	9.3	fine cordmarked	Xindian	fine sand	light brown
FCN5043	16	2017	Huizuiwa	Lintao	17LH-T1-L31	H4	Ceramic sherd	ceramic	body	2.4	fine cordmarked	Xindian	fine sand	light brown (orange)
FCN5043	4	2017	Huizuiwa	Lintao	17LH-T1-L31	H4	Ceramic sherd	ceramic	body	7.2	fine cordmarked	Xindian	fine sand	orange
FCN5043	29	2017	Huizuiwa	Lintao	17LH-T1-L31	H4	Ceramic sherd	ceramic	body	1.4	plain	Xindian	medium sand	light brown
FCN5043	17	2017	Huizuiwa	Lintao	17LH-T1-L31	H4	Ceramic sherd	ceramic	body	3.3	plain	Xindian	medium sand	light brown (orange)
FCN5043	11	2017	Huizuiwa	Lintao	17LH-T1-L31	H4	Ceramic sherd	ceramic	body	6.7	plain	Xindian	medium sand	grey
FCN5043	24	2017	Huizuiwa	Lintao	17LH-T1-L31	H4	Ceramic sherd	ceramic	body	4.4	plain	Xindian	medium sand	grey
FCN5043	26	2017	Huizuiwa	Lintao	17LH-T1-L31	H4	Ceramic sherd	ceramic	body	2.9	plain	Xindian	medium sand	grey
FCN5043	27	2017	Huizuiwa	Lintao	17LH-T1-L31	H4	Ceramic sherd	ceramic	body	1.9	plain	Xindian	medium sand	grey
FCN5043	15	2017	Huizuiwa	Lintao	17LH-T1-L31	H4	Ceramic sherd	ceramic	handle	3.5	plain	Xindian	medium sand	grey brown
FCN5043	18	2017	Huizuiwa	Lintao	17LH-T1-L31	H4	Ceramic sherd	ceramic	body	2.7	plain	Xindian	medium sand	orange
FCN5043	9	2017	Huizuiwa	Lintao	17LH-T1-L31	H4	Ceramic sherd	ceramic	body	10.9	plain	Xindian	medium sand	orange (grey core)
FCN5043	6	2017	Huizuiwa	Lintao	17LH-T1-L31	H4	Ceramic sherd	ceramic	body	10.7	plain	Xindian	fine sand	light brown
FCN5043	7	2017	Huizuiwa	Lintao	17LH-T1-L31	H4	Ceramic sherd	ceramic	body	9.4	plain	Xindian	fine sand	light brown
FCN5043	14	2017	Huizuiwa	Lintao	17LH-T1-L31	H4	Ceramic sherd	ceramic	body	20.3	plain	Xindian
